# Supplementary material
Source: PubMed Central journal article supplement (PMC6764152)
Supplement: ja9b07140_si_001.pdf [file ja9b07140_si_001.pdf]

# Supporting information

## Efficient Copper Catalyzed Multicomponent Synthesis of *N*-acyl amidines via Acyl Nitrenes

Kaj M. van Vliet,<sup>[a]</sup> Lara H. Polak,<sup>[a]</sup> Maxime A. Siegler,<sup>[b]</sup> Jarl Ivar van der Vlugt,<sup>[a]</sup> Célia Fonseca Guerra,<sup>[c][d]</sup> and Bas de Bruin\*<sup>[a]</sup>

[a] Homogeneous, Supramolecular and Bio-inspired Catalysis Group (HomKat), van 't Hoff Institute for Molecular Sciences (HIMS), Universiteit van Amsterdam (UvA), Amsterdam 1012 WX, The Netherlands

[b] Department of Chemistry, John Hopkins University, Baltimore, Maryland 21218, United States.

[c] Department of Theoretical Chemistry and Amsterdam Center for Multiscale Modeling, Vrije Universiteit Amsterdam (VU), De Boelelaan 1083, 1081 HV Amsterdam, The Netherlands.

[d] Leiden Institute of Chemistry, Gorlaeus Laboratories, Leiden University, Einsteinweg 55, 2333 CC Leiden, The Netherlands.

### Contents

|                                                                        |            |
|------------------------------------------------------------------------|------------|
| <b>EXPERIMENTAL SECTION</b>                                            | <b>S2</b>  |
| General Considerations                                                 | S2         |
| Synthesis of copper catalysts                                          | S2         |
| Synthesis of substrates                                                | S4         |
| Hydroxamic acids                                                       | S4         |
| Dioxazolones                                                           | S5         |
| Condition screening table                                              | S9         |
| Cu-catalyzed three-component reactions                                 | S10        |
| Kinetic measurements                                                   | S18        |
| Formation of [Cu(CCPh)(Xantphos)]                                      | S21        |
| H/D-Exchange Experiment                                                | S24        |
| X-ray Diffraction                                                      | S25        |
| NMR spectra                                                            | S26        |
| <b>COMPUTATIONAL SECTION</b>                                           | <b>S38</b> |
| General Considerations                                                 | S38        |
| Energies                                                               | S38        |
| Energy Comparison Between Nitrene Insertion and Curtius Rearrangement. | S39        |
| Coordinates                                                            | S40        |
| <b>REFERENCES IN THE SI</b>                                            | <b>S51</b> |

## EXPERIMENTAL SECTION

### General Considerations

All reactions were performed in air, unless stated otherwise. For inert experiments, solvents were distilled from sodium (toluene, tetrahydrofuran, diethyl ether) or  $\text{CaH}_2$  (dichloromethane, hexane, methanol, acetonitrile). All chemicals were purchased from commercial suppliers and have been used without further purification. NMR spectra ( $^1\text{H}$ ,  $^{13}\text{C}$  and  $^{31}\text{P}$ ) were recorded on a Bruker AV400, AV300, DRX 500 or DRX 300 spectrometer, referenced to residual solvent resonance signals. Mass spectrometry spectra were recorded on a JEOL JMS-T100LP AccuTOF 2012 (ESI), JEOL JMS-T100GCv AccuTOF 2012, (EI, CI & FD) or Bruker Impact II Q-TOF 2018 (ESI, CSI).

### Synthesis of copper catalysts

$\text{CuCl}$ ,  $\text{CuBr}$ ,  $\text{CuI}$ ,  $[\text{Cu}(\text{NCMe})_4]\text{PF}_6$  and  $[\text{Cu}(\text{NCMe})_4]\text{BF}_4$ , dppe and  $\text{PPh}_3$  were purchased from commercial suppliers and have been used without further purification.  $[\text{Cu}(\text{NCMe})(\text{TpBr}_3)]$ ,  $[\text{Cu}(\text{THF})(\text{TpMs})]$  and  $[\text{CuCl}(\text{IPr})]$  have been received from the group of Pedro J. Pérez at the University of Huelva.<sup>1</sup> Copper(I)acetate is a grey solid and is highly oxygen and water sensitive. As many suppliers send it as a green solid, we advise to order it from Strem Chemicals or to make it yourself as described below.

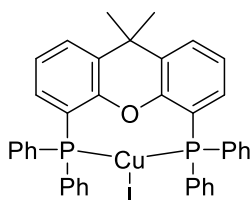

#### [Cu(Xantphos)]

$[\text{Cu}(\text{Xantphos})]$  was synthesized according to a modified literature procedure.<sup>2</sup> In a 100 mL round-bottomed flask,  $\text{CuI}$  (1g, 5.3 mmol) was dissolved in MeCN (50 mL) at 50 °C. To this solution was added Xantphos (3.6 g, 6.2 mmol). The reaction mixture was stirred for 2h at 50 °C, cooled to room temperature and filtered. The residue was washed with cold MeCN (25 mL) and dried *in vacuo* to give the product as a white solid (4g, 5.3 mmol, >99% yield).  $^1\text{H}$  NMR (400 MHz, methylene chloride- $d_2$ )  $\delta$  7.58 (d,  $J = 7.7$  Hz, 2H), 7.43 (q,  $J = 6.2$  Hz, 8H), 7.34 (t,  $J = 7.4$  Hz, 4H), 7.25 (t,  $J = 7.5$  Hz, 8H), 7.12 (t,  $J = 7.7$  Hz, 2H), 6.60 (dt,  $J = 7.8, 3.9$  Hz, 2H), 1.66 (s, 6H).  $^{31}\text{P}$  NMR (162 MHz, methylene chloride- $d_2$ )  $\delta$  -17.81.

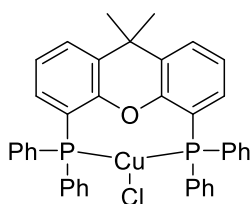

#### [CuCl(Xantphos)]<sup>3</sup>

In a flame-dried Schlenk flask Xantphos (1g, 1.7 mmol) was added to a suspension of  $\text{CuCl}$  (beads, 168 mg, 1.7 mmol) in acetonitrile (20 mL). After stirring the reaction overnight, the suspension was filtered and washed with acetonitrile to give the product as a white solid.  $^1\text{H}$  NMR (400 MHz, chloroform- $d$ )  $\delta$  7.55 (d,  $J = 7.7$  Hz, 2H), 7.47 – 7.39 (m, 8H), 7.35 – 7.27 (m, 4H), 7.27 – 7.20 (m, 8H), 7.11 (t,  $J = 7.7$  Hz, 2H), 6.63 – 6.55 (m, 2H), 1.70 (s, 6H).  $^{13}\text{C}$  NMR (126 MHz, chloroform- $d$ )  $\delta$  154.58 (t,  $J = 6.2$  Hz), 133.78 (t,  $J = 8.0$  Hz), 133.17, 131.69 – 131.23 (m), 129.78, 128.52 (t,  $J = 4.9$  Hz), 126.70, 124.75, 119.96 (t,  $J = 13.9$  Hz), 35.75, 28.35.  $^{31}\text{P}$  NMR (162 MHz, chloroform- $d$ )  $\delta$  -17.66.

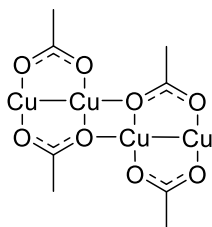

### Copper(I)acetate (CuOAc) (preferably purchased from Strem)

CuOAc was synthesized according to a literature procedure.<sup>4</sup> In a N<sub>2</sub>-filled glovebox, a 250 mL flame-dried Schlenk flask was charged with CuCl (3.3 g, 33 mmol). The schlenk flask was attached to a Schlenk line and dried *in vacuo*, after which degassed DCM (120 mL) was added. Acetic acid was dried by fractional distillation from acetic anhydride and KMnO<sub>3</sub>,<sup>5</sup> degassed and added (1.9 mL).

After stirring for 10 min at r.t., dry and degassed Et<sub>3</sub>N (5.2 mL, distilled over CaH<sub>2</sub>) was added, turning the white suspension in a solution. After stirring for 4h at r.t. under an atmosphere of N<sub>2</sub>, the reaction mixture turned into a blue-grey suspension. The product was collected by inert filtration using an inversion filter. The blue filtrate was discarded and the product was washed with DCM (50 mL) and dried *in vacuo*. The product (0.79 g, 6.4 mmol, 19% yield) was stored under an atmosphere of N<sub>2</sub>.

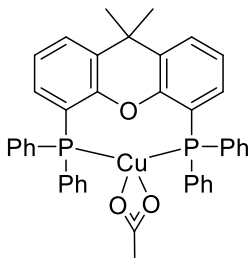

### [Cu(OAc)(Xantphos)]

Try to avoid the use of colored batches of CuOAc as purification can be difficult. [Cu(OAc)(Xantphos)] was synthesized according to a literature procedure.<sup>6</sup> A flame-dried Schlenk flask was charged with Xantphos (3 g, 5.2 mmol) and flushed with nitrogen. In a N<sub>2</sub>-filled glovebox, CuOAc (638 mg, 5.2 mmol) was added. The flask was attached to a Schlenk line and dry, degassed THF (200 mL) was added. After stirring the reaction for 4h at r.t. under an

atmosphere of N<sub>2</sub>, the reaction mixture was opened to air and solvents were removed *in vacuo*. The concentrate was dissolved in DCM, precipitated with pentane, filtered and washed with pentane to give the product as a white solid (2.7 g, 3.8 mmol, 74% yield). <sup>1</sup>H NMR (300 MHz, CDCl<sub>3</sub>) δ 7.51 (t, *J* = 6.6 Hz, 2H), 7.45– 7.15 (m, 20H), 7.08 (t, *J* = 7.9 Hz, 2H), 6.58 (s, 2H), 1.93 (s, 3H), 1.66 (s, 6H); <sup>13</sup>C NMR (126 MHz, CDCl<sub>3</sub>) δ 155.15, 133.86, 133.79, 133.72, 133.58, 132.17, 132.03, 131.89, 131.53, 129.58, 128.46, 128.42, 128.38, 126.31, 124.43, 99.99, 35.86, 28.01. <sup>31</sup>P NMR (121 MHz, CDCl<sub>3</sub>) δ -16.80. HRMS (FD<sup>+</sup>) *m/z* calcd. for C<sub>41</sub>H<sub>35</sub>CuO<sub>3</sub>P<sub>2</sub> [M +H]<sup>+</sup> 700.1357 found 700.1379.

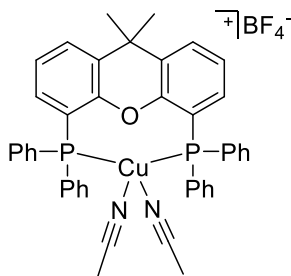

### [Cu(NCMe)<sub>2</sub>(Xantphos)]BF<sub>4</sub>

In a 100 mL round-bottomed flask, Xantphos (1.84 g, 3.2 mmol) was added to a solution of [Cu(NCMe)<sub>4</sub>]BF<sub>4</sub> (1 g, 3.2 mmol) in DCM (60 mL). After stirring the reaction mixture for 2h, the solvent was removed *in vacuo* to give the product as a white solid (2.6 g, 3.2 mmol, quantitative yield). <sup>1</sup>H NMR (300 MHz, chloroform-*d*) δ 7.60 (dd, *J* = 7.8, 1.4 Hz, 2H), 7.44 – 7.21 (m, 20H), 7.17 (t, *J* = 7.7 Hz, 2H), 6.65 (ddt, *J* = 6.5, 4.1, 2.1 Hz, 2H), 2.16 (s, 6H), 1.69 (s, 6H). <sup>13</sup>C NMR (126 MHz, chloroform-*d*) δ 154.34 (t, *J* = 6.0 Hz), 133.31 (t, *J* = 8.1 Hz), 131.47, 130.53 (t, *J* = 18.0 Hz), 130.32, 128.95 (t, *J* = 4.9 Hz), 127.23,

124.99, 121.64 – 117.86 (m), 35.82, 28.38, 2.15. <sup>31</sup>P NMR (121 MHz, chloroform-*d*) δ -14.01.

## Synthesis of substrates

### Hydroxamic acids

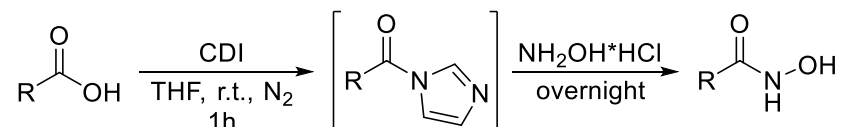

#### Typical procedure A

In a flame-dried Schlenk flask, carbonyldiimidazole (CDI, 7.8 g, 48 mmol, 1.5 equiv.) was added to a solution of acid acid (32 mmol, 1 equiv.) in dry THF (100 mL). After one hour of stirring at room temperature under a nitrogen atmosphere, hydroxylamine hydrochloride (4.5 g, 64 mmol, 2 equiv.) was added and the resulting solution was stirred under N<sub>2</sub> overnight. Subsequently, the solution was diluted with an aqueous solution of potassium bisulfate (5%, 100 mL) and extracted with ethyl acetate (2 x 100 mL). The combined organic layers were washed with brine (150 mL), dried over MgSO<sub>4</sub> and concentrated *in vacuo*. If necessary, the compound was recrystallized from either EtOAc or EtOAc/hexane mixtures.

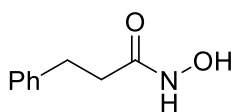

#### **N-hydroxy-3-phenylpropanamide**<sup>8</sup>

Prepared according to typical procedure A, yielding a white solid. Isolated yield: 4.9 g (29.7 mmol, 89%). <sup>1</sup>H NMR (400 MHz, DMSO-*d*<sub>6</sub>) δ 10.37 (s, 1H), 8.71 (s, 1H), 7.27 (t, *J* = 7.4 Hz, 1H), 7.19 (d, *J* = 8.0 Hz, 2H), 2.80 (t, *J* = 7.8 Hz, 1H), 2.25 (t, *J* = 7.8 Hz, 1H). <sup>13</sup>C NMR (126 MHz, DMSO-*d*<sub>6</sub>) δ 168.24, 141.06, 128.27, 128.20, 125.92, 33.88, 32.71, 30.84.

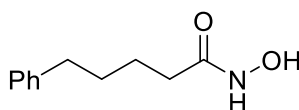

#### **N-hydroxy-5-phenylpentanamide**<sup>7</sup>

Prepared according to typical procedure A, yielding a white solid. Isolated yield: 832 mg, (4.3 mmol, 86%). <sup>1</sup>H NMR (400 MHz, DMSO-*d*<sub>6</sub>) δ 10.38 (s, 1H), 9.77 (s, 0H), 9.04 (s, 0H), 8.71 (s, 1H), 7.27 (t, *J* = 7.5 Hz, 2H), 7.21 – 7.13 (m, 3H), 2.57 (t, *J* = 6.9 Hz, 2H), 1.98 (t, 2H), 1.61 – 1.46 (m, 4H). <sup>13</sup>C NMR (101 MHz, DMSO-*d*<sub>6</sub>) δ 169.51, 142.52, 128.73, 128.68, 126.10, 35.31, 32.59, 31.05, 25.26.

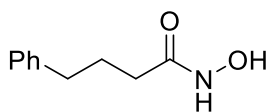

#### **N-hydroxy-4-phenylbutanamide**<sup>8</sup>

Prepared according to general procedure A, yielding a white solid. Isolated yield: 0.212 g, 1.2 mmol, 66%. <sup>1</sup>H NMR (300 MHz, CDCl<sub>3</sub>) δ 7.43 – 7.11 (m, 7H), 2.77 (t, *J* = 7.4 Hz, 2H), 2.65 (t, *J* = 7.5 Hz, 2H), 2.10 (p, *J* = 7.4 Hz, 2H). <sup>13</sup>C NMR (126 MHz, DMSO-*d*<sub>6</sub>) δ 169.33, 142.12, 128.76, 126.24, 99.99, 35.07, 32.25, 27.45.

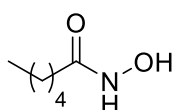

#### **N-hydroxyhexanamide**

Prepared according to typical procedure A, yielding a white solid. Isolated yield: 1.9 g (14.5 mmol, 45%). <sup>1</sup>H NMR (500 MHz, DMSO-*d*<sub>6</sub>) δ 10.31 (s, 1H), 8.64 (s, 1H), 1.92 (t,

$J = 7.4$  Hz, 2H), 1.48 (p,  $J = 7.4$  Hz, 2H), 1.32 – 1.15 (m, 4H), 0.85 (t,  $J = 7.1$  Hz, 3H).  $^{13}\text{C}$  NMR (126 MHz,  $\text{DMSO-}d_6$ )  $\delta$  169.10, 32.21, 30.78, 24.77, 21.80, 13.85.

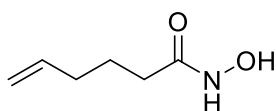

#### **N-hydroxyhex-5-enamide<sup>8</sup>**

Prepared according to typical procedure A, yielding a white solid. Isolated yield: 1.55 g, 12.0 mmol, 84%.  $^1\text{H}$  NMR (500 MHz,  $\text{DMSO-}d_6$ )  $\delta$  10.34 (s, 1H), 8.66 (s, 1H), 5.78 (ddt,  $J = 16.9, 9.9, 6.5$  Hz, 1H), 5.08 – 4.77 (m, 2H), 2.11 – 1.82 (m, 4H), 1.57 (p,  $J = 7.5$  Hz, 2H).  $^{13}\text{C}$  NMR (126 MHz,  $\text{DMSO-}d_6$ )  $\delta$  168.91, 138.15, 115.15, 40.02, 39.95, 39.85, 39.78, 39.69, 39.61, 39.52, 39.45, 39.35, 39.19, 39.03, 39.02, 32.65, 31.68, 24.37.

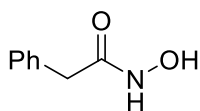

#### **N-hydroxy-2-phenylacetamide**

Prepared according to typical procedure A, yielding a white solid. Isolated yield: 1.7 g, 11.2 mmol, 37%.  $^1\text{H}$  NMR (400 MHz,  $\text{DMSO-}d_6$ )  $\delta$  10.65 (s, 1H), 8.82 (s, 1H), 7.25 (m, 5H), 3.27 (s, 2H).  $^{13}\text{C}$  NMR (126 MHz,  $\text{DMSO-}d_6$ )  $\delta$  166.97, 136.06, 128.90, 128.17, 126.40, 39.39.

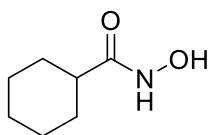

#### **N-hydroxycyclohexanecarboxamide<sup>7</sup>**

Prepared according to typical procedure A, yielding a white solid. Isolated yield: 3.06 g, 21.4 mmol, 53%.  $^2\text{H}$  NMR (400 MHz, chloroform- $d$ )  $\delta$  2.69 (m, 1H), 2.02 (m, 2H), 1.90 – 1.80 (m, 2H), 1.73 (m, 1H), 1.54 (qd,  $J = 11.7, 3.3$  Hz, 2H), 1.46 – 1.26 (m, 3H).

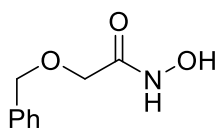

#### **2-(benzyloxy)-N-hydroxyacetamide**

Prepared according to typical procedure A, yielding a white solid. Isolated yield: 3.51 g, 19.4 mmol, 69%.  $^1\text{H}$  NMR (500 MHz,  $\text{DMSO-}d_6$ )  $\delta$  7.43 – 7.17 (m, 5H), 4.52 (d,  $J = 3.4$  Hz, 2H), 3.88 (s, 2H).  $^{13}\text{C}$  NMR (126 MHz,  $\text{DMSO-}d_6$ )  $\delta$  165.90, 138.19, 128.70, 128.12, 128.05, 72.73, 68.55.

## **Dioxazolones**

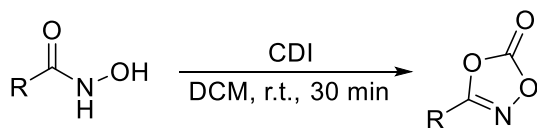

### **Typical procedure B**

The hydroxamic acid (15 mmol, 1 equiv.) was dissolved in DCM (150 mL), followed by the addition of carbonyldiimidazole (2.4 g, 22.5 mmol, 1.5 equiv.). After stirring at room temperatures for 30 minutes, the solution was diluted with aqueous HCl solution (1 M, 100 mL) and extracted with DCM (2 x 150 mL). The combined organic layers were dried over magnesium sulfate, and concentrated under reduced pressure. The crude was purified by filtration over a plug of silica with DCM to give the product.

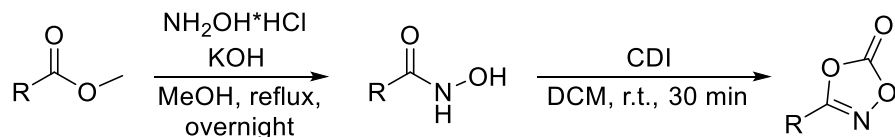

### Typical procedure C

Potassium hydroxide (13.4 g, 239 mmol, 6 equiv.) was added to a suspension of methyl ester (5 mL, 40 mmol, 1 equiv.) and hydroxylamine hydrochloride (8.3 g, 119 mmol, 3 equiv.) in methanol (200 mL). After refluxing overnight, the mixture was acidified to pH 4 with HCl (1M in H<sub>2</sub>O). The methanol was evaporated under reduced pressure and the compound was extracted with ethyl acetate (3 x 170 mL). The combined organic layers were dried over magnesium sulfate, after which the solvents were evaporated, yielding a white solid that was directly used for typical procedure B to give the dioxazolone.

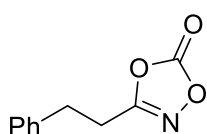

### 3-phenethyl-1,4,2-dioxazol-5-one (1a)<sup>8</sup>

Prepared according to typical procedure B, resulting in a colorless oil that solidifies when solidified product was added. Isolated yield: 4.3 g, 22.6 mmol, 81%. <sup>1</sup>H NMR (400 MHz, chloroform-*d*) δ 7.38 – 7.22 (m, 3H), 7.21 (d, *J* = 7.5 Hz, 2H), 3.04 (t, *J* = 7.6 Hz, 2H), 2.99 – 2.90 (m, 2H); <sup>13</sup>C NMR (126 MHz, CDCl<sub>3</sub>) δ 165.96, 154.13, 138.14, 129.05, 128.30, 127.29, 30.59, 26.79.

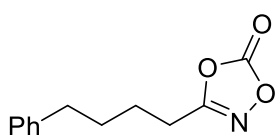

### 3-(4-phenylbutyl)-1,4,2-dioxazol-5-one (1b)<sup>9</sup>

Prepared according to typical procedure B, resulting in a colorless oil. Isolated yield: 2.83 g, 12.9 mmol, 83%. <sup>1</sup>H NMR (500 MHz, chloroform-*d*) δ 7.32 (t, *J* = 7.5 Hz, 2H), 7.27 – 7.17 (m, 3H), 2.73 – 2.67 (m, 2H), 2.67 – 2.60 (m, 2H), 1.82 – 1.72 (m, 4H). <sup>13</sup>C NMR (126 MHz, chloroform-*d*) δ 166.59, 154.21, 141.32, 128.52, 128.39, 126.13, 35.19, 30.37, 24.65, 24.02.

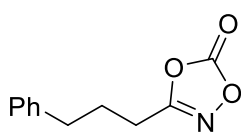

### 3-(3-phenylpropyl)-1,4,2-dioxazol-5-one (1c)<sup>8</sup>

Prepared according to typical procedure B, resulting in a colorless liquid. Isolated yield: 0.212 g, 1.2 mmol, 66%. <sup>1</sup>H NMR (300 MHz, CDCl<sub>3</sub>) δ 7.38 – 7.13 (m, 5H), 2.75 (t, *J* = 7.4 Hz, 2H), 2.62 (t, *J* = 7.5 Hz, 2H), 2.07 (p, *J* = 7.4 Hz, 2H); <sup>13</sup>C NMR (126 MHz, CDCl<sub>3</sub>) δ 166.56, 154.19, 139.92, 128.76, 128.55, 126.62, 34.64, 25.96, 24.11.

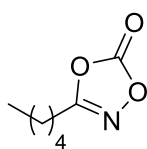

### 3-pentyl-1,4,2-dioxazol-5-one (1d)<sup>9</sup>

Prepared according to typical procedure B, resulting in a colorless oil. Isolated yield: 1.7 g, 10.8 mmol, 75%. <sup>1</sup>H NMR (500 MHz, chloroform-*d*) δ 2.61 (t, *J* = 7.6 Hz, 2H), 1.72 (q, *J* = 7.4 Hz, 2H), 1.37 (qt, *J* = 8.8, 4.5 Hz, 4H), 0.92 (t, *J* = 7.0 Hz, 3H). <sup>13</sup>C NMR (126 MHz, chloroform-*d*) δ 166.72, 154.22, 30.79, 24.71, 24.20, 22.02, 13.73.

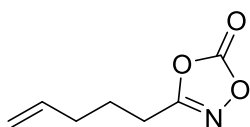

### 3-(pent-4-en-1-yl)-1,4,2-dioxazol-5-one (1e)<sup>8</sup>

Prepared according to typical procedure B, resulting in a colorless liquid. Isolated yield: 0.20 g, 1.3 mmol, 17%. <sup>1</sup>H-NMR (400 MHz, CDCl<sub>3</sub>) δ 5.76 (ddt, *J* = 17.1, 10.3, 6.7 Hz, 1H), 5.13 – 5.04 (m, 2H), 2.64 (t, *J* = 7.5 Hz, 2H), 2.25 – 2.12 (m, 2H), 1.84 (p, *J* = 7.3 Hz, 2H); <sup>13</sup>C NMR (126 MHz, CDCl<sub>3</sub>) δ 166.66, 154.27, 136.33, 116.75, 32.58, 24.09, 23.65.

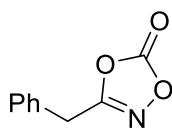

### 3-benzyl-1,4,2-dioxazol-5-one (1f)<sup>11</sup>

Prepared according to typical procedure C, yielding a colorless liquid. Isolated yield: 0.62 g, 3.5 mmol, 43% yield). <sup>1</sup>H NMR (400 MHz, CDCl<sub>3</sub>) δ 7.42 – 7.27 (m, 5H), 3.93 (s, 2H); <sup>13</sup>C NMR (126 MHz, CDCl<sub>3</sub>) δ 165.42, 154.05, 130.54, 129.41, 129.12, 128.61, 31.39.

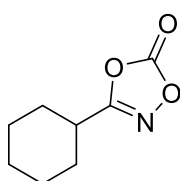

### 3-cyclohexyl-1,4,2-dioxazol-5-one (1g)<sup>10</sup>

Prepared according to typical procedure B, resulting in a colorless liquid. Isolated yield: 3.22 g, 19.0 mmol, 91%. <sup>1</sup>H NMR (400 MHz, chloroform-*d*) δ 2.66 (td, *J* = 11.2, 5.6 Hz, 1H), 1.99 (dd, *J* = 13.2, 3.9 Hz, 2H), 1.88 – 1.77 (m, 2H), 1.71 (dd, *J* = 11.7, 4.8 Hz, 1H), 1.52 (qd, *J* = 11.7, 3.3 Hz, 2H), 1.43 – 1.23 (m, 3H). <sup>13</sup>C NMR (126 MHz, chloroform-*d*) δ 169.32, 154.29, 34.54, 28.05, 25.21, 24.77.

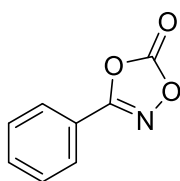

### 3-phenyl-1,4,2-dioxazol-5-one (1h)<sup>11</sup>

Prepared according to typical procedure C, resulting in a white solid. Isolated yield: 1.9 g, 11.4 mmol, 28% yield). <sup>1</sup>H-NMR (400 MHz, CDCl<sub>3</sub>) δ 7.86 (d, *J* = 8.1 Hz, 2H), 7.66 (t, *J* = 7.3 Hz, 1H), 7.55 (t, *J* = 7.3 Hz, 2H); <sup>13</sup>C NMR (126 MHz, CDCl<sub>3</sub>) δ 163.68, 153.97, 133.92, 129.53, 126.76, 120.28.

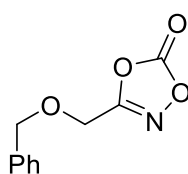

### 3-((benzyloxy)methyl)-1,4,2-dioxazol-5-one (1i)

Prepared according to typical procedure B, resulting in a colorless oil. Isolated yield: 346 mg, 1.7 mmol, 15% yield. <sup>1</sup>H NMR (400 MHz, chloroform-*d*) δ 7.43 – 7.31 (m, 5H), 4.66 (s, 2H), 4.45 (s, 2H). <sup>13</sup>C NMR (101 MHz, chloroform-*d*) δ 163.24, 153.49, 135.67, 128.65, 128.54, 128.10, 73.67, 60.17.

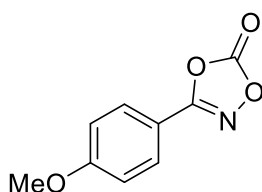

### 3-(4-methoxyphenyl)-1,4,2-dioxazol-5-one (1j)<sup>11</sup>

Prepared according to typical procedure C, resulting in a colourless liquid that solidifies over time. <sup>1</sup>H NMR (300 MHz, CDCl<sub>3</sub>) δ 7.79 (d, *J* = 8.9 Hz, 2H), 7.02 (d, *J* = 8.9 Hz, 2H), 3.90 (s, 3H); <sup>13</sup>C NMR (126 MHz, CDCl<sub>3</sub>) δ 164.00, 163.55, 154.18, 128.70, 115.01, 112.24, 55.76.

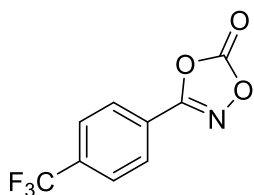

### 3-(4-(trifluoromethyl)phenyl)-1,4,2-dioxazol-5-one (1k)

The hydroxamic acid was prepared according to the reaction in typical procedure A and was used without recrystallization to prepared **1k** according to typical procedure B, resulting in a white solid. Isolated yield: 3.20 g, 15.6 mmol, 67% yield.  $^1\text{H}$  NMR (300 MHz, chloroform-*d*)  $\delta$  8.03 (d,  $J = 8.2$  Hz, 1H), 7.85 (d,  $J = 8.3$  Hz, 1H).  $^{13}\text{C}$  NMR (126 MHz, chloroform-*d*)  $\delta$  162.53, 153.31, 135.30 (q,  $J = 33.2$  Hz), 127.12, 126.46 (q,  $J = 3.8$  Hz), 123.53, 122.07 (d,  $J = 272.9$  Hz).

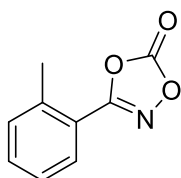

### 3-(o-tolyl)-1,4,2-dioxazol-5-one (1l)

Prepared according to typical procedure C, resulting in a white solid. Isolated yield: 1.763 g, 9.95 mmol, 27% yield.  $^1\text{H}$  NMR (400 MHz, chloroform-*d*)  $\delta$  7.76 (d,  $J = 7.8$  Hz, 1H), 7.52 (t,  $J = 7.6$  Hz, 1H), 7.37 (d,  $J = 7.4$  Hz, 2H), 2.60 (s, 3H).  $^{13}\text{C}$  NMR (126 MHz, chloroform-*d*)  $\delta$  164.01, 153.69, 139.15, 133.15, 132.05, 128.78, 126.50, 119.21, 22.10.

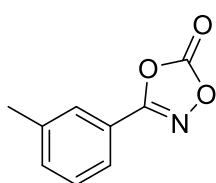

### 3-(m-tolyl)-1,4,2-dioxazol-5-one (1m)

Prepared according to typical procedure C, resulting in a white solid. Isolated yield: 1.28 g, 7.23 mmol, 20%.  $^1\text{H}$  NMR (400 MHz, chloroform-*d*)  $\delta$  7.65 (m, 2H), 7.43 (m, 2H), 2.44 (s, 3H).  $^{13}\text{C}$  NMR (126 MHz, chloroform-*d*)  $\delta$  163.67, 153.88, 139.51, 134.62, 129.27, 126.95, 123.78, 119.98, 21.25.

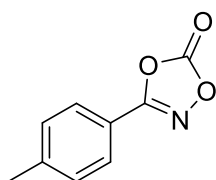

### 3-(p-tolyl)-1,4,2-dioxazol-5-one (1n)

The hydroxamic acid was prepared according to the reaction in typical procedure A and was used without recrystallization to prepared **1n** according to typical procedure B, resulting in a white solid. 1.97 g, 13.0 mmol, 37%.  $^1\text{H}$  NMR (500 MHz, chloroform-*d*)  $\delta$  7.73 (d,  $J = 8.1$  Hz, 2H), 7.34 (d,  $J = 7.9$  Hz, 2H), 2.45 (s, 3H).  $^{13}\text{C}$  NMR (126 MHz, chloroform-*d*)  $\delta$  163.65, 153.95, 144.81, 130.08, 126.57, 117.27, 21.80.



## Conditions Screening Table

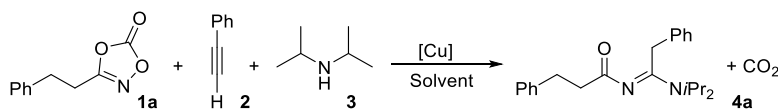

| entry           | Catalyst                                          | Eq. 2a   | Eq. 3a   | loading (mol%) | Solvent                 | Yield (%)      |
|-----------------|---------------------------------------------------|----------|----------|----------------|-------------------------|----------------|
| 1               | CuCl                                              | 2        | 2        | 10             | CHCl <sub>3</sub>       | 55             |
| 2               | CuBr                                              | 2        | 2        | 10             | CHCl <sub>3</sub>       | 63             |
| 3               | CuI                                               | 2        | 2        | 10             | CHCl <sub>3</sub>       | 62             |
| 4               | [Cu(NCMe) <sub>4</sub> ]BF <sub>4</sub>           | 2        | 2        | 10             | CHCl <sub>3</sub>       | 65             |
| 5               | [Cu(NCMe) <sub>4</sub> ]PF <sub>6</sub>           | 2        | 2        | 10             | CHCl <sub>3</sub>       | 75             |
| 6               | [(TpBr <sub>3</sub> )Cu(NCMe)]                    | 2        | 2        | 10             | CHCl <sub>3</sub>       | 5              |
| 7               | [(TpMs)Cu(THF)]                                   | 2        | 2        | 10             | CHCl <sub>3</sub>       | 0              |
| 8               | [(IPr)CuCl]                                       | 2        | 2        | 10             | CHCl <sub>3</sub>       | 37             |
| 9               | [(Xantphos)CuI]                                   | 2        | 2        | 10             | CHCl <sub>3</sub>       | 0              |
| 10              | [Cu(OAc)(Xantphos)]                               | 2        | 2        | 10             | CHCl <sub>3</sub>       | 98             |
| 11              | [(Xantphos)Cu(NCMe) <sub>2</sub> ]BF <sub>4</sub> | 2        | 2        | 10             | CHCl <sub>3</sub>       | 72             |
| 12              | [Cu(OAc)(Xantphos)]                               | 2        | 2        | 10             | DCM                     | 58 (97%*)      |
| 13              | [Cu(OAc)(Xantphos)]                               | 2        | 2        | 10             | THF                     | 95             |
| 14              | [Cu(OAc)(Xantphos)]                               | 2        | 2        | 10             | MeCN                    | 0              |
| 15              | [Cu(OAc)(Xantphos)]                               | 2        | 2        | 10             | EtOAc                   | 92             |
| 16              | [Cu(OAc)(Xantphos)]                               | 2        | 2        | 10             | MeOH                    | 0              |
| 17              | [Cu(OAc)(Xantphos)]                               | 2        | 2        | 10             | DCE                     | 74             |
| 19              | [Cu(OAc)(Xantphos)]                               | 2        | 2        | 10             | Toluene                 | 93             |
| 20              | <b>[Cu(OAc)(Xantphos)]</b>                        | <b>2</b> | <b>2</b> | <b>5</b>       | <b>CHCl<sub>3</sub></b> | <b>97</b>      |
| 21              | [Cu(OAc)(Xantphos)]                               | 2        | 2        | 2              | CHCl <sub>3</sub>       | 43 (94%*)      |
| 22              | [Cu(OAc)(Xantphos)]                               | 2        | 2        | 1              | CHCl <sub>3</sub>       | 10 (19%*)      |
| 23              | [Cu(OAc)(Xantphos)]                               | 2        | 2        | 0.5            | CHCl <sub>3</sub>       | 0              |
| 24              | [Cu(OAc)(Xantphos)]                               | 2        | 2        | 0.1            | CHCl <sub>3</sub>       | 0              |
| 25 <sup>#</sup> | [Cu(OAc)(Xantphos)]                               | 2        | 2        | 5              | CHCl <sub>3</sub>       | 0 (98%*)       |
| 26              | [Cu(OAc)] + dppe                                  | 2        | 2        | 5              | CHCl <sub>3</sub>       | 79%*           |
| 27              | [Cu(OAc)] + dppe                                  | 2        | 2        | 5              | CHCl <sub>3</sub>       | 82%*           |
| 28              | -                                                 | 2        | 2        | -              | CHCl <sub>3</sub>       | 0 <sup>§</sup> |
| 29              | -                                                 | 2        | -        | -              | CHCl <sub>3</sub>       | 0 <sup>§</sup> |
| 30              | -                                                 | -        | 2        | -              | CHCl <sub>3</sub>       | 0 <sup>§</sup> |
| 31              | [Cu(OAc)(Xantphos)]                               | 1.5      | 1.5      | 5              | CHCl <sub>3</sub>       | 90             |
| 32              | [Cu(OAc)(Xantphos)]                               | 1.2      | 1.2      | 5              | CHCl <sub>3</sub>       | 71             |
| 33              | [Cu(OAc)(Xantphos)]                               | 1        | 1        | 5              | CHCl <sub>3</sub>       | 69             |
| 34              | [Cu(OAc)(Xantphos)]                               | 2        | 1        | 5              | CHCl <sub>3</sub>       | 84             |
| 35              | [Cu(OAc)(Xantphos)]                               | 1        | 2        | 5              | CHCl <sub>3</sub>       | 56             |

Reaction of **1a** (0.5 mmol), **2a** (2 eq.), **3** (2 eq.) and catalyst in solvent (1 mL), stirred overnight at room temperature. Yields are determined by <sup>1</sup>H-NMR spectroscopy with 1,3,5-trimethoxybenzene as external standard. <sup>§</sup> Full conversion to 1,1-diisopropyl-3-phenethylurea was observed. \* Reactions performed in a N<sub>2</sub> filled glovebox. <sup>#</sup> 10 mL of chloroform was used. <sup>§</sup> no conversion of starting material was observed

## Cu-catalyzed three-component reactions

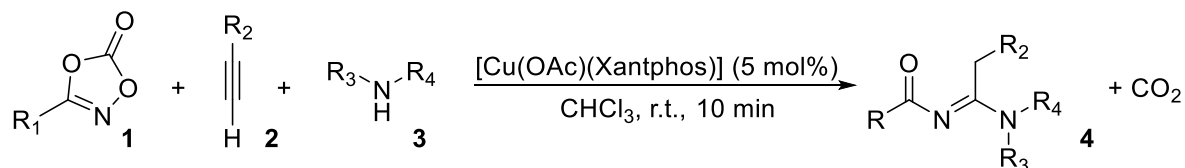

### Typical procedure D

Do not use  $\text{CHCl}_3$  that is stabilized with MeOH.

In a 4 mL vial,  $[\text{Cu}(\text{OAc})(\text{Xantphos})]$  (17.5 mg, 25  $\mu\text{mol}$ , 0.05 eq) was dissolved in  $\text{CHCl}_3$  (1 mL). To the resulting colorless solution was added the acetylene (**2**, 1 mmol, 2 eq). After addition of the amine (**3**, 1 mmol, 2 eq) the solution turned yellow, directly the 1,4,2-dioxazol-5-one (**1**, 0.5 mmol, 1 eq) was added and the vial was capped with a screw cap. After 10 minutes of stirring, the vial was carefully opened to release the overpressure. The solvent was removed *in vacuo* and the crude product was purified by flash column chromatography (DCM, with 2%  $\text{Et}_3\text{N}$  and 3% EtOAc).

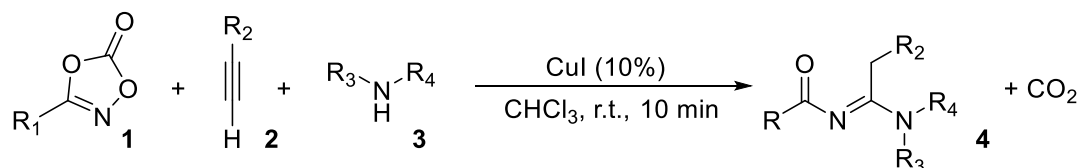

### Typical procedure E

Do not use  $\text{CHCl}_3$  that is stabilized with MeOH.

In a 4 mL vial,  $\text{CuI}$  (19 mg, 50  $\mu\text{mol}$ , 0.10 eq) was suspended in  $\text{CHCl}_3$  (1 mL). To the resulting suspension was added the acetylene (**2**, 1 mmol, 2 eq). After addition of the amine (**3**, 1 mmol, 2 eq) the solution turned yellow, directly the 1,4,2-dioxazol-5-one (**1**, 0.5 mmol, 1 eq) was added and the vial was capped with a screw cap. After 30 minutes of stirring, the vial was carefully opened to release the overpressure. The solvent was removed *in vacuo* and the crude product was purified by flash column chromatography (DCM, with 2%  $\text{Et}_3\text{N}$  and 3% EtOAc).

### (E)-N-(1-(diisopropylamino)-2-phenylethylidene)-3-phenylpropanamide (**4aaa**)

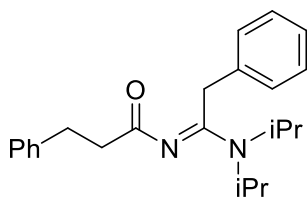

The reaction of **1a**, phenylacetylene and diisopropylamine according to procedure D yielded the product as a colorless oil: 170 mg, 0.49 mmol, 97%.  $^1\text{H}$  NMR (500 MHz, chloroform-*d*)  $\delta$  7.36 – 7.01 (m, 10H), 3.97 (s, 2H), 3.96 – 3.87 (m, 1H), 3.68 – 3.36 (m, 1H), 2.95 (t,  $J = 8.1$  Hz, 2H), 2.68 (t,  $J = 8.1$  Hz, 2H), 1.62 – 1.28 (m, 6H), 1.06 – 0.73 (m, 6H).  $^{13}\text{C}$  NMR (126 MHz, chloroform-*d*)  $\delta$  182.35, 161.05, 142.09, 136.43, 128.69, 128.33, 128.26, 128.08, 126.52, 125.69, 49.70, 47.38, 41.83, 37.26, 32.00, 20.12. MS (ESI)

$m/z$  calc. for  $[\text{C}_{23}\text{H}_{30}\text{N}_2\text{O}+\text{H}]^+$  351.2 found 351.2,  $m/z$  calc. for  $[\text{C}_{23}\text{H}_{30}\text{N}_2\text{O}+\text{Na}]^+$  373.2 found 373.1.

#### (E)-N-(1-(diisopropylamino)-2-phenylethylidene)-5-phenylpentanamide (4baa)

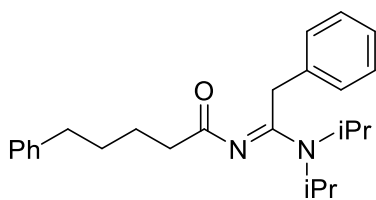

The reaction of **1b**, phenylacetylene and diisopropylamine according to procedure D yielded the product as a colorless oil: 182 mg, 0.48 mmol, 97%. <sup>1</sup>H NMR (500 MHz, chloroform-*d*) δ 7.35 – 7.06 (m, 10H), 4.00 (s, 2H), 3.96 – 3.80 (m, 1H), 3.59 – 3.39 (m, 1H), 2.61 (t, *J* = 7.3 Hz, 2H), 2.38 (t, *J* = 7.1 Hz, 2H), 1.77 – 1.58 (m, 4H), 1.58 – 1.33 (m, 6H), 1.04 – 0.77 (m, 6H). <sup>13</sup>C NMR (126 MHz, chloroform-*d*) δ 183.41, 160.71, 142.68, 136.47, 128.70, 128.43, 128.19, 128.05, 126.53,

125.53, 49.69, 47.32, 40.31, 37.23, 35.84, 31.33, 25.70, 20.13. MS (ESI<sup>+</sup>) *m/z* calc. for [C<sub>25</sub>H<sub>34</sub>N<sub>2</sub>O+H]<sup>+</sup> 379.3 found 379.2, *m/z* calc. for [C<sub>25</sub>H<sub>34</sub>N<sub>2</sub>O+Na]<sup>+</sup> 401.3 found 401.2.

#### (E)-N-(1-(diisopropylamino)-2-phenylethylidene)-4-phenylbutanamide (4caa)

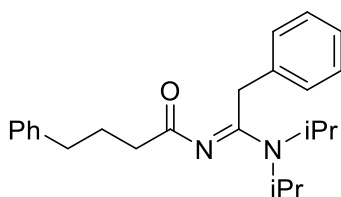

The reaction of **1c**, phenylacetylene and diisopropylamine according to procedure D yielded the product as a colorless oil: 168 mg, 0.46 mmol, 92%. <sup>1</sup>H NMR (500 MHz, chloroform-*d*) δ 7.36 – 7.09 (m, 10H), 4.02 (s, 2H), 3.97 – 3.85 (m, 1H), 3.60 – 3.42 (m, 1H), 2.65 (d, *J* = 7.6 Hz, 2H), 2.39 (t, *J* = 7.5 Hz, 2H), 1.96 (p, *J* = 7.6 Hz, 2H), 1.61 – 1.34 (m, 6H), 1.04 – 0.78 (m, 6H). <sup>13</sup>C NMR (126 MHz, chloroform-*d*) δ 183.19, 160.81, 142.41, 136.45, 128.70, 128.51, 128.19, 128.05, 126.53, 125.60, 49.68,

47.21, 39.93, 37.23, 35.61, 27.57, 20.13. MS (ESI<sup>+</sup>) *m/z* calc. for [C<sub>24</sub>H<sub>32</sub>N<sub>2</sub>O+H]<sup>+</sup> 365.2 found 365.2, *m/z* calc. for [C<sub>24</sub>H<sub>32</sub>N<sub>2</sub>O+Na]<sup>+</sup> 387.2 found 387.2.

#### (E)-N-(1-(diisopropylamino)-2-phenylethylidene)hexanamide (4daa)

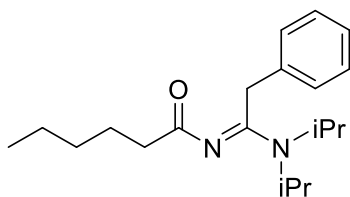

The reaction of **1d**, phenylacetylene and diisopropylamine according to procedure D yielded the product as a colorless oil: 139 mg, 0.44 mmol, 88%. <sup>1</sup>H NMR (400 MHz, chloroform-*d*) δ 7.35 – 7.15 (m, 5H), 4.00 (s, 2H), 3.92 (s, 1H), 3.48 (s, 1H), 2.33 (t, *J* = 7.6 Hz, 2H), 1.62 (t, *J* = 7.4 Hz, 2H), 1.47 (dd, *J* = 14.4, 7.1 Hz, 6H), 1.29 (q, *J* = 3.9 Hz, 4H), 0.92 (s, 6H), 0.88 – 0.82 (m, 3H). <sup>13</sup>C NMR (101 MHz, chloroform-*d*) δ 183.70, 136.37, 128.55, 127.90, 126.37, 49.47, 47.17, 40.38, 37.08,

31.60, 25.60, 22.43, 19.99, 13.89. HRMS (FD<sup>+</sup>) *m/z* calc. for [C<sub>20</sub>H<sub>32</sub>N<sub>2</sub>O]<sup>+</sup> 316.2514 found 316.2515

#### (E)-N-(1-(diisopropylamino)-2-phenylethylidene)hex-5-enamide (4eaa)

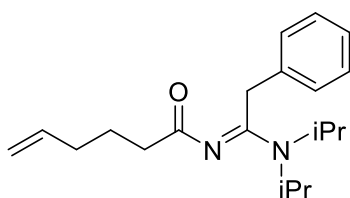

The reaction of **1e**, phenylacetylene and diisopropylamine according to procedure D yielded the product as a yellowish oil: 115 mg, 0.37 mmol, 73%. <sup>1</sup>H-NMR of the reaction mixture showed full conversion into the desired product. <sup>1</sup>H NMR (500 MHz, chloroform-*d*) δ 7.34 – 7.16 (m, 5H), 5.80 (ddt, *J* = 16.8, 9.7, 6.6 Hz, 1H), 5.04 – 4.88 (m, 2H), 4.01 (s, 2H), 3.93 (s, 1H), 3.49 (s, 1H), 2.36 (t, *J* = 7.6 Hz, 2H), 2.08 (q, *J* = 7.3 Hz, 2H), 1.73 (p, *J* = 7.6 Hz, 2H), 1.50 (s, 6H), 0.92 (s, 6H). <sup>13</sup>C NMR

(126 MHz, chloroform-*d*) δ 183.30, 160.72, 138.66, 136.45, 128.68, 128.03, 126.51, 114.53, 99.99, 49.65,

47.33, 39.83, 37.23, 33.53, 25.17, 20.11. MS (ESI<sup>+</sup>) *m/z* calc. for [C<sub>20</sub>H<sub>30</sub>N<sub>2</sub>O+H]<sup>+</sup> 315.2 found 316.2, *m/z* calc. for [C<sub>20</sub>H<sub>30</sub>N<sub>2</sub>O+Na]<sup>+</sup> 337.2 found 337.1.

#### (E)-N-(1-(diisopropylamino)-2-phenylethylidene)-2-phenylacetamide (4faa)

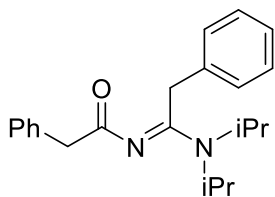

The reaction of **1f**, phenylacetylene and diisopropylamine according to procedure D under an N<sub>2</sub> atmosphere yielded the product as a yellowish solid: 148 mg, 0.44 mmol, 88%. <sup>1</sup>H NMR (500 MHz, chloroform-*d*) δ 7.30 – 7.15 (m, 8H), 7.02 (d, *J* = 7.3 Hz, 2H), 3.96 (s, 2H), 3.94 – 3.84 (m, 1H), 3.68 (s, 2H), 3.48 – 3.35 (m, 1H), 1.46 – 1.29 (m, 6H), 0.96 – 0.76 (m, 6H). <sup>13</sup>C NMR (126 MHz, chloroform-*d*) δ 180.48, 162.01, 137.10, 136.25, 129.68, 128.60, 128.18, 127.99, 126.39, 126.08, 49.87, 47.77, 47.42, 37.20, 19.92. MS (ESI<sup>+</sup>)

*m/z* calc. for [C<sub>22</sub>H<sub>28</sub>N<sub>2</sub>O+H]<sup>+</sup> 337.2 found 337.2, *m/z* calc. for [C<sub>22</sub>H<sub>28</sub>N<sub>2</sub>O+Na]<sup>+</sup> 359.2 found 359.1.

#### (E)-N-(1-(diisopropylamino)-2-phenylethylidene)cyclohexanecarboxamide (4gaa)

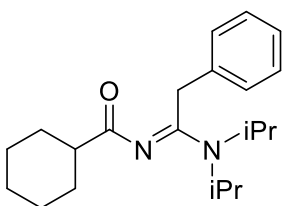

The reaction of **1g**, phenylacetylene and diisopropylamine according to procedure D under an N<sub>2</sub> atmosphere yielded the product as a yellowish solid: 151 mg, 0.046 mmol, 92%. <sup>1</sup>H NMR (500 MHz, chloroform-*d*) δ 7.37 – 7.15 (m, 5H), 3.99 (s, 2H), 3.93 (s, 1H), 3.54 – 3.40 (m, 1H), 2.33 – 2.20 (m, 1H), 1.92 (d, *J* = 11.9 Hz, 2H), 1.80 – 1.69 (m, 2H), 1.69 – 1.60 (m, 1H), 1.59 – 1.45 (m, 6H), 1.46 – 1.35 (m, 2H), 1.33 – 1.15 (m, 3H), 1.00 – 0.81 (m, 6H). <sup>13</sup>C NMR (126 MHz, chloroform-*d*) δ 186.23, 161.31, 136.68, 128.64, 128.05, 126.45, 49.79, 48.46, 47.25, 37.43, 29.96, 26.25, 26.06, 20.14. HRMS (ESI<sup>+</sup>)

*m/z* calc. for [C<sub>21</sub>H<sub>32</sub>N<sub>2</sub>O+H]<sup>+</sup> 329.2587 found 329.259.

#### (E)-N-(1-(diisopropylamino)-2-phenylethylidene)benzamide (4haa)

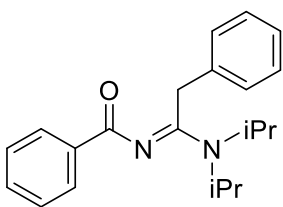

The reaction of **1h**, phenylacetylene and diisopropylamine according to procedure E yielded the product as a white solid: 110 mg, 0.34 mmol, 68%. <sup>1</sup>H NMR (500 MHz, chloroform-*d*) δ 8.16 (d, *J* = 7.4 Hz, 2H), 7.47 (t, *J* = 7.1 Hz, 1H), 7.43 (t, *J* = 7.4 Hz, 2H), 7.34 – 7.26 (m, 4H), 7.20 (t, *J* = 7.0 Hz, 1H), 4.15 (s, 2H), 4.12 – 4.02 (m, 1H), 3.67 – 3.52 (m, 1H), 1.72 – 1.53 (m, 6H), 1.08 – 0.89 (m, 6H). <sup>13</sup>C NMR (126 MHz, chloroform-*d*) δ 174.32, 163.83, 138.02, 136.45, 131.07, 129.34, 128.69, 128.16, 127.90, 126.52, 50.10, 47.61, 37.83,

20.37, 20.11. HRMS (ESI<sup>+</sup>) *m/z* calc. for [C<sub>21</sub>H<sub>26</sub>N<sub>2</sub>O+H]<sup>+</sup> 323.2118 found 323.2122, *m/z* calc. for [C<sub>21</sub>H<sub>26</sub>N<sub>2</sub>O+Na]<sup>+</sup> 345.1937 found 345.1940, *m/z* calc. for [C<sub>21</sub>H<sub>26</sub>N<sub>2</sub>O+H]<sup>+</sup> 361.1677 found 361.1679.

#### (E)-N-(1-(diisopropylamino)-2-phenylethylidene)-4-methoxybenzamide (4jaa)

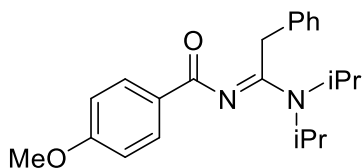

The reaction of **1j**, phenylacetylene and diisopropylamine according to procedure E yielded the product as a white solid: 111 mg, 0.32 mmol, 64%. <sup>1</sup>H NMR (500 MHz, chloroform-*d*) δ 8.10 (d, *J* = 8.7 Hz, 2H), 7.32 – 7.22 (m, 4H), 7.18 (dd, *J* = 7.8, 5.6 Hz, 1H), 6.92 (d, *J* = 8.7 Hz, 2H), 4.11 (s, 2H), 4.08 – 4.00 (m, 1H), 3.86 (s, 3H), 3.62 – 3.50 (m, 1H), 1.67 – 1.51 (m, 6H), 1.04 – 0.86 (m, 6H). <sup>13</sup>C NMR (126 MHz,

chloroform-*d*)  $\delta$  174.25, 163.10, 162.09, 136.54, 131.25, 130.77, 128.66, 128.16, 126.46, 113.12, 55.34, 49.97, 47.46, 37.77, 20.39, 20.16. HRMS (ESI<sup>+</sup>) *m/z* calc. for [C<sub>22</sub>H<sub>28</sub>N<sub>2</sub>O<sub>2</sub>+H]<sup>+</sup> 353.2224 found 353.2227, *m/z* calc. for [C<sub>22</sub>H<sub>28</sub>N<sub>2</sub>O<sub>2</sub>+Na]<sup>+</sup> 375.2043 found 375.2045, *m/z* calc. for [C<sub>22</sub>H<sub>28</sub>N<sub>2</sub>O<sub>2</sub>+K]<sup>+</sup> 391.1782 found 391.1783.

**(E)-N-(1-(diisopropylamino)-2-phenylethylidene)-4-(trifluoromethyl)benzamide (4kaa)**

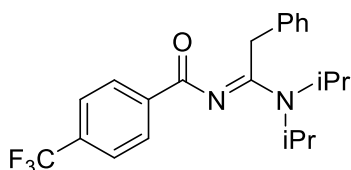

The reaction of **1k**, phenylacetylene and diisopropylamine according to procedure E yielded the product as a white solid: 113 mg, 0.29 mmol, 58%. <sup>1</sup>H NMR (500 MHz, chloroform-*d*)  $\delta$  8.23 (d, *J* = 8.0 Hz, 2H), 7.66 (d, *J* = 8.1 Hz, 2H), 7.32 – 7.24 (m, 4H), 7.24 – 7.16 (m, 1H), 4.16 (s, 2H), 4.10 (p, *J* = 6.7 Hz, 1H), 3.68 – 3.55 (m, 1H), 1.60 (d, *J* = 6.8 Hz, 6H), 0.99 (d, *J* = 6.6 Hz, 6H). <sup>13</sup>C NMR (126 MHz, chloroform-*d*)  $\delta$  172.49, 165.38, 141.33, 136.17, 132.60 (q, *J* = 32.1 Hz), 129.52, 128.78, 128.06, 126.69, 124.11 (q, *J* = 272.5 Hz), 12z4.90 (q, *J* = 3.7 Hz), 50.41, 47.90, 37.78, 20.36, 20.05. HRMS (ESI<sup>+</sup>) *m/z* calc. for [C<sub>22</sub>H<sub>25</sub>F<sub>3</sub>N<sub>2</sub>O+H]<sup>+</sup> 391.1992 found 391.1989, *m/z* calc. for [C<sub>22</sub>H<sub>25</sub>F<sub>3</sub>N<sub>2</sub>O+Na]<sup>+</sup> 413.1811 found 413.1808, *m/z* calc. for [C<sub>22</sub>H<sub>25</sub>F<sub>3</sub>N<sub>2</sub>O+K]<sup>+</sup> 429.1551 found 429.1546.

**(E)-N-(1-(diisopropylamino)-2-phenylethylidene)-2-methylbenzamide (4laa)**

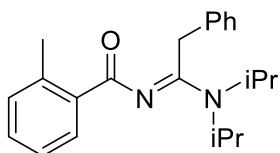

The reaction of **1l**, phenylacetylene and diisopropylamine according to procedure E yielded the product as a yellow solid: 57 mg, 0.17 mmol, 34%. <sup>1</sup>H NMR (500 MHz, chloroform-*d*)  $\delta$  8.01 – 7.91 (m, 2H), 7.36 – 7.24 (m, 6H), 7.20 (t, *J* = 6.9 Hz, 1H), 4.13 (s, 2H), 4.11 – 4.01 (m, 1H), 3.67 – 3.50 (m, 1H), 2.42 (s, 3H), 1.72 – 1.51 (m, 6H), 1.07 – 0.87 (m, 6H). <sup>13</sup>C NMR (126 MHz, chloroform-*d*)  $\delta$  174.57, 163.58, 137.96, 137.48, 136.48, 131.84, 129.95, 128.67, 128.18, 127.80, 126.57, 126.50, 50.07, 47.58, 37.84, 21.42, 20.35, 20.12. MS (ESI<sup>+</sup>) *m/z* calc. for [C<sub>22</sub>H<sub>28</sub>N<sub>2</sub>O+H]<sup>+</sup> 337.2 found 337.2.

**(E)-N-(1-(diisopropylamino)-2-phenylethylidene)-3-methylbenzamide (4maa)**

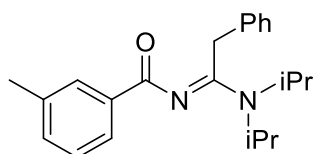

The reaction of **1m**, phenylacetylene and diisopropylamine according to procedure E yielded the product as a white solid: 84 mg, 0.25 mmol, 50%. <sup>1</sup>H NMR (500 MHz, chloroform-*d*)  $\delta$  8.01 – 7.93 (m, 2H), 7.31 (tt, *J* = 11.7, 5.2 Hz, 6H), 7.20 (t, *J* = 7.1 Hz, 1H), 4.14 (s, 2H), 4.11 – 4.04 (m, 1H), 3.69 – 3.53 (m, 1H), 2.42 (s, 3H), 1.73 – 1.53 (m, 6H), 1.06 – 0.87 (m, 6H). <sup>13</sup>C NMR (126 MHz, chloroform-*d*)  $\delta$  174.57, 163.57, 137.96, 137.48, 136.48, 131.84, 129.95, 128.67, 128.19, 127.80, 126.57, 126.50, 50.06, 47.57, 37.84, 21.42, 20.35, 20.12. (ESI<sup>+</sup>) *m/z* calc. for [C<sub>22</sub>H<sub>28</sub>N<sub>2</sub>O+H]<sup>+</sup> 337.2 found 337.2.

**(E)-N-(1-(diisopropylamino)-2-phenylethylidene)-4-methylbenzamide (4naa)**

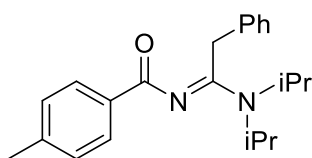

The reaction of **1n**, phenylacetylene and diisopropylamine according to procedure E yielded the product as a white solid: 94 mg, 0.28 mmol, 56%. <sup>1</sup>H NMR (500 MHz, chloroform-*d*)  $\delta$  8.06 (d, *J* = 7.7 Hz, 2H), 7.34 – 7.26 (m, 4H), 7.24 (d, *J* = 7.8 Hz, 2H), 7.20 (t, *J* = 7.1 Hz, 1H), 4.13 (s, 2H), 4.11 – 3.99 (m, 1H), 3.65 – 3.50 (m, 1H), 2.41 (s, 3H), 1.70 – 1.52 (m, 6H), 1.06 – 0.87 (m, 6H). <sup>13</sup>C NMR (126 MHz, chloroform-*d*)  $\delta$  174.48, 163.36, 141.38,

136.51, 135.36, 129.43, 128.66, 128.64, 128.17, 126.48, 50.02, 47.52, 37.81, 21.52, 20.36, 20.13. (ESI<sup>+</sup>) *m/z* calc. for [C<sub>22</sub>H<sub>28</sub>N<sub>2</sub>O+H]<sup>+</sup> 337.2 found 337.2.

**(E)-N-(1-(diisopropylamino)-2-(p-tolyl)ethylidene)-3-phenylpropanamide (4aba)**

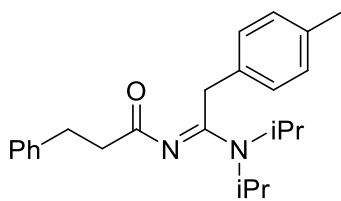

The reaction of **1a**, 4-tolylacetylene and diisopropylamine according to procedure D under an N<sub>2</sub> atmosphere yielded the product as a colorless oil: 177 mg, 0.49 mmol, 97%. <sup>1</sup>H NMR (500 MHz, chloroform-*d*) δ 7.30 – 7.08 (m, 9H), 4.04 – 3.88 (m, 1H), 3.96 (s, 2H), 3.60 – 3.43 (m, 1H), 2.98 (t, *J* = 8.2 Hz, 2H), 2.69 (t, *J* = 8.1 Hz, 2H), 2.35 (s, 3H), 1.59 – 1.39 (m, 6H), 1.10 – 0.82 (m, 6H). <sup>13</sup>C NMR (126 MHz, chloroform-*d*) δ 182.33, 161.17, 142.14, 136.02, 133.28, 129.35, 128.33, 128.25,

127.91, 125.66, 49.64, 47.34, 41.85, 36.78, 32.03, 21.02, 20.18. HRMS (FD<sup>+</sup>) *m/z* calc. for [C<sub>24</sub>H<sub>32</sub>N<sub>2</sub>O]<sup>+</sup> 364.2515 found 364.2502.

**(E)-N-(1-(diisopropylamino)-2-(m-tolyl)ethylidene)-3-phenylpropanamide (4aca)**

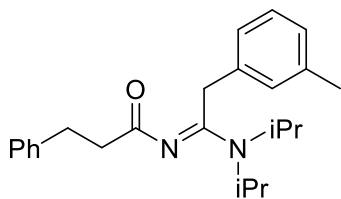

The reaction of **1a**, 3-tolylacetylene and diisopropylamine according to procedure D under an N<sub>2</sub> atmosphere yielded the product as a yellowish oil: 176 mg, 0.48 mmol, 97%. <sup>1</sup>H NMR (500 MHz, chloroform-*d*) δ 7.30 – 7.10 (m, 6H), 7.07 – 6.96 (m, 3H), 4.00 – 3.85 (m, 1H), 3.94 (s, 2H), 3.61 – 3.40 (m, 1H), 2.94 (t, *J* = 8.1 Hz, 2H), 2.67 (t, *J* = 8.2 Hz, 2H), 2.32 (s, 3H), 1.56 – 1.35 (m, 6H), 1.08 – 0.79 (m, 6H). <sup>13</sup>C NMR (126

MHz, chloroform-*d*) δ 192.58, 182.36, 142.13, 138.25, 136.29, 128.82, 128.56, 128.32, 128.26, 127.22, 125.67, 124.95, 41.87, 37.04, 32.02, 21.44, 20.14. HRMS (ESI<sup>+</sup>) *m/z* calc. for [C<sub>24</sub>H<sub>32</sub>N<sub>2</sub>O+Na]<sup>+</sup> 387.2407 found 387.239

**(E)-N-(1-(diisopropylamino)-2-(o-tolyl)ethylidene)-3-phenylpropanamide (4ada)**

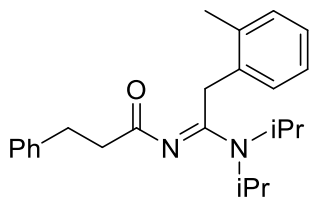

The reaction of **1a**, 2-tolylacetylene and diisopropylamine according to procedure D under an N<sub>2</sub> atmosphere yielded the product as a yellowish oil: 177 mg, 0.49 mmol, 97%. <sup>1</sup>H NMR (500 MHz, chloroform-*d*) δ 7.28 – 7.19 (m, 2H), 7.19 – 7.11 (m, 7H), 3.87 (s, 2H), 3.73 – 3.50 (m, 2H), 2.90 (t, *J* = 8.1 Hz, 2H), 2.62 (t, *J* = 8.1 Hz, 2H), 2.25 (s, 3H), 1.61 – 1.42 (m, 6H), 1.09 – 0.89 (m, 6H). <sup>13</sup>C NMR (126 MHz, chloroform-*d*) δ 182.55, 161.25, 142.08, 135.50, 134.61, 130.17, 128.31, 128.22, 127.06, 126.63, 126.27,

125.64, 49.67, 47.31, 41.73, 34.07, 31.96, 20.25, 19.72. HRMS (ESI) *m/z* calc. for [C<sub>24</sub>H<sub>32</sub>N<sub>2</sub>O+Na]<sup>+</sup> 387.2407 found 387.240.

**(E)-N-(1-(diisopropylamino)-2-(4-methoxyphenyl)ethylidene)-3-phenylpropanamide (4aea)**

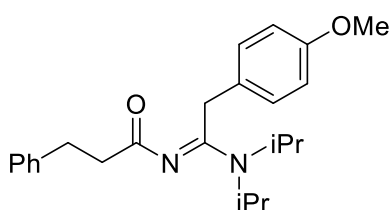

The reaction of **1a**, 4-methoxyphenylacetylene and diisopropylamine according to procedure D under an N<sub>2</sub> atmosphere yielded the product as a white solid: 160 mg, 0.42 mmol, 84%. <sup>1</sup>H NMR (400 MHz, chloroform-*d*) δ 7.31 – 7.05 (m, 9H), 4.01 – 3.86 (m, 1H), 3.56 – 3.40 (m, 1H), 2.94 (t, *J* = 8.1 Hz, 2H), 2.66 (t, *J* = 8.2 Hz, 2H), 2.31 (s, 3H), 1.56 – 1.34 (m, 6H), 1.08 – 0.82 (m, 6H). <sup>13</sup>C NMR

(101 MHz, chloroform-*d*)  $\delta$  182.22, 161.09, 142.01, 135.90, 133.14, 129.24, 128.22, 128.15, 127.78, 125.56, 49.57, 47.22, 41.74, 36.67, 31.92, 20.92, 20.02. HRMS (FD<sup>+</sup>)  $m/z$  calc. for [C<sub>24</sub>H<sub>32</sub>N<sub>2</sub>O<sub>2</sub>]<sup>+</sup> 380.2464 found 380.2464.

**(E)-N-(1-(diisopropylamino)-2-(4-fluorophenyl)ethylidene)-3-phenylpropanamide (4afa)**

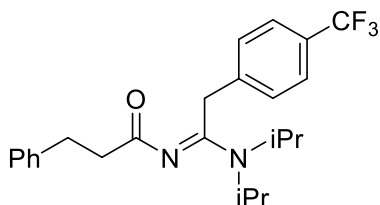

The reaction of **1a**, 4-trifluoromethylphenylacetylene and diisopropylamine according to procedure D under an N<sub>2</sub> atmosphere yielded the product as a yellowish solid: 201 mg, 0.48 mmol, 96%. <sup>1</sup>H NMR (500 MHz, chloroform-*d*)  $\delta$  7.54 (d, *J* = 8.1 Hz, 2H), 7.34 (d, *J* = 8.0 Hz, 2H), 7.25 – 7.17 (m, 4H), 7.16 – 7.11 (m, 1H), 3.99 (s, 2H), 3.89 – 3.80 (m, 1H), 3.55 – 3.46 (m, 1H), 2.95 (t, *J* = 8.0 Hz, 2H), 2.69 (t, *J* = 7.9 Hz, 2H), 1.56 – 1.36 (m, 6H), 1.04 – 0.82 (m, 6H). <sup>13</sup>C NMR (126 MHz, chloroform-*d*)  $\delta$  182.53, 160.33, 141.90, 140.64, 128.44, 128.31, 128.27, 125.76, 125.60 (q, *J* = 3.8 Hz), 49.68, 47.50, 41.69, 37.11, 31.86, 20.11. HRMS (ESI)  $m/z$  calc. for [C<sub>24</sub>H<sub>29</sub>F<sub>3</sub>N<sub>2</sub>O+H]<sup>+</sup> 419.2305 found 419.230.

**(E)-N-(1-(diisopropylamino)-2-(4-(trifluoromethyl)phenyl)ethylidene)-3-phenylpropanamide (4aga)**

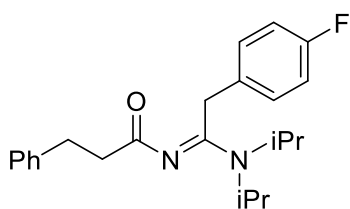

The reaction of **1a**, 3-tolylacetylene and diisopropylamine according to procedure D under an N<sub>2</sub> atmosphere yielded the product as a white solid: 168 mg, 0.46 mmol, 91%. <sup>1</sup>H NMR (500 MHz, chloroform-*d*)  $\delta$  7.28 – 7.19 (m, 6H), 7.16 (t, *J* = 7.1 Hz, 1H), 6.99 (t, *J* = 8.5 Hz, 2H), 3.97 – 3.80 (m, 1H), 3.91 (2H), 3.58 – 3.42 (m, 1H), 2.96 (t, *J* = 8.0 Hz, 2H), 2.69 (t, *J* = 8.0 Hz, 2H), 1.61 – 1.33 (m, 6H), 1.08 – 0.77 (m, 6H). <sup>13</sup>C NMR (126 MHz, chloroform-*d*)  $\delta$  182.34, 162.55, 160.95, 160.60, 142.00, 132.17 (d, *J* = 3.3 Hz), 129.68 (d, *J* = 7.9 Hz), 125.73, 115.50 (d, *J* = 21.3 Hz), 49.63, 47.44, 41.72, 36.68, 31.93, 20.12. HRMS (ESI<sup>+</sup>)  $m/z$  calc. for [C<sub>23</sub>H<sub>29</sub>FN<sub>2</sub>O+H]<sup>+</sup> 369.2337 found 369.233.

**(E)-N-(1-(diisopropylamino)-2-(pyridin-3-yl)ethylidene)-3-phenylpropanamide (4aha)**

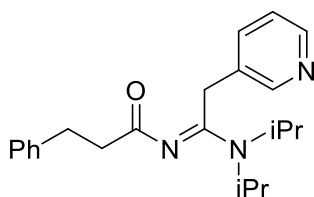

The reaction of **1a**, phenylacetylene and diisopropylamine according to procedure D yielded the product as a colorless oil: 138 mg, 0.39 mmol, 79%. <sup>1</sup>H NMR (400 MHz, Chloroform-*d*)  $\delta$  8.50 – 8.44 (m, 2H), 7.65 (d, *J* = 7.9 Hz, 1H), 7.29 – 7.19 (m, 5H), 7.15 (t, *J* = 6.7 Hz, 1H), 3.93 (s, 2H), 3.90 – 3.75 (m, 1H), 3.60 – 3.37 (m, 1H), 2.96 (t, *J* = 7.9 Hz, 2H), 2.70 (t, *J* = 7.9 Hz, 2H), 1.64 – 1.33 (m, 6H), 1.10 – 0.76 (m, 6H). <sup>13</sup>C NMR (101 MHz, Chloroform-*d*)  $\delta$  182.48, 160.20, 149.44, 148.05, 141.86, 135.80, 132.31, 128.32, 128.28, 125.76, 123.56, 49.69, 47.60, 41.67, 34.72, 31.87, 20.17. HRMS (FD<sup>+</sup>)  $m/z$  calc. for [C<sub>22</sub>H<sub>29</sub>N<sub>3</sub>O<sub>1</sub>]<sup>+</sup> 351.2311 found 351.2277.

#### (E)-N-(1-(diisopropylamino)-2-(thiophen-3-yl)ethylidene)-3-phenylpropanamide (4aga)

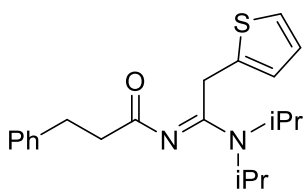

The reaction of **1a**, phenylacetylene and diisopropylamine according to procedure D yielded the product as a colorless oil: 175 mg, 0.49 mmol, 98%. <sup>1</sup>H NMR (400 MHz, Chloroform-*d*) δ 7.31 – 7.20 (m, 5H), 7.18 (t, *J* = 6.9 Hz, 1H), 7.07 (d, *J* = 1.4 Hz, 1H), 7.00 (d, *J* = 4.9 Hz, 1H), 4.06 – 3.94 (m, 1H), 3.94 (s, 2H), 3.59 – 3.41 (m, 1H), 2.97 (t, *J* = 8.0 Hz, 2H), 2.69 (t, *J* = 8.0 Hz, 2H), 1.60 – 1.30 (m, 7H), 1.17 – 0.82 (m, 6H). <sup>13</sup>C NMR (101 MHz, Chloroform-*d*) δ 182.34, 161.05, 142.06, 136.28, 128.34, 128.28, 127.91,

125.83, 125.72, 121.66, 49.71, 47.44, 41.74, 32.39, 32.00, 20.17. HRMS (FD<sup>+</sup>) *m/z* calc. for [C<sub>21</sub>H<sub>28</sub>N<sub>2</sub>O<sub>1</sub>S<sub>1</sub>]<sup>+</sup> 356.1922 found 356.1930.

#### (E)-N-(1-(tert-butyl(ethyl)amino)-2-phenylethylidene)-3-phenylpropanamide (4aag)

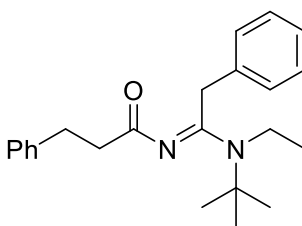

The reaction of **1a**, phenylacetylene and *N*-ethyl-*N*-tert-butylamine according to procedure D yielded the product as a white solid: 168 mg, 0.48 mmol, 96%. <sup>1</sup>H NMR (500 MHz, chloroform-*d*) δ 7.33 (t, *J* = 7.6 Hz, 2H), 7.30 – 7.21 (m, 5H), 7.21 – 7.13 (m, 3H), 3.97 (s, 2H), 3.33 (q, *J* = 7.1 Hz, 2H), 2.89 (t, *J* = 7.9 Hz, 2H), 2.62 (t, *J* = 8.3 Hz, 2H), 1.56 (s, 9H), 1.16 (t, *J* = 7.1 Hz, 3H). <sup>13</sup>C NMR (126 MHz, chloroform-*d*) δ 182.10, 160.58, 141.98, 136.61, 128.73, 128.33, 128.28, 128.14, 126.59, 125.72, 58.87, 41.57, 40.31, 37.59, 31.80, 28.79, 17.24. HRMS (FD<sup>+</sup>) *m/z* calc. for [C<sub>23</sub>H<sub>30</sub>N<sub>2</sub>O<sub>1</sub>]<sup>+</sup>

350.2358 found 350.2356.

#### (E)-N-(1-(dicyclohexylamino)-2-phenylethylidene)-3-phenylpropanamide (4aah)

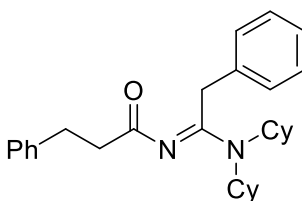

The reaction of **1a**, phenylacetylene and dicyclohexylamine according to procedure D yielded the product as a yellow solid: 204 mg, 0.48 mmol, 95%. <sup>1</sup>H NMR (500 MHz, chloroform-*d*) δ 7.39 – 7.12 (m, 10H), 4.01 (s, 2H), 3.61 – 3.45 (m, 1H), 3.12 – 2.92 (m, 3H), 2.90 – 2.62 (m, 4H), 1.86 – 1.74 (m, 2H), 1.74 – 1.42 (m, 7H), 1.42 – 1.07 (m, 8H), 1.07 – 0.82 (m, 3H). <sup>13</sup>C NMR (126 MHz, chloroform-*d*) δ 182.00, 161.70, 142.15, 136.75, 128.64, 128.34, 128.28, 128.26, 126.54, 125.72, 58.88,

57.90, 53.49, 41.87, 37.87, 32.09, 30.57, 29.17, 26.58, 25.73, 25.54, 25.13. HRMS (FD<sup>+</sup>) *m/z* calc. for [C<sub>29</sub>H<sub>38</sub>N<sub>2</sub>O<sub>1</sub>]<sup>+</sup> 430.2984 found 430.2965.

#### (E)-3-phenyl-N-(2-phenyl-1-(2,2,6,6-tetramethylpiperidin-1-yl)vinyl)propanamide (4aai)

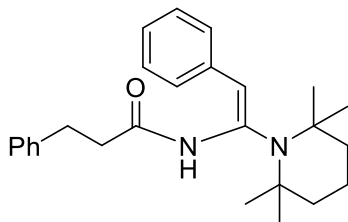

The reaction of **1a**, phenylacetylene and diisopropylamine according to procedure D yielded the product as a white solid: 180 mg, 0.46 mmol, 92%. <sup>1</sup>H NMR (500 MHz, chloroform-*d*) δ 7.37 – 7.09 (m, 11H), 6.30 (d, *J* = 6.4 Hz, 1H), 6.05 (s, 1H), 2.93 (t, *J* = 7.5 Hz, 2H), 2.49 (t, *J* = 7.6 Hz, 2H), 1.90 – 1.69 (m, 2H), 1.61 – 1.48 (m, 4H), 1.48 – 1.36 (m, 2H), 1.31 (s, 7H), 1.12 (s, 5H). <sup>13</sup>C NMR (126 MHz, chloroform-*d*) δ 167.31, 140.92, 137.36, 134.10, 128.52, 128.05, 127.60, 126.22,

126.06, 120.07, 55.64, 41.83, 39.22, 32.22, 30.83, 25.31, 18.02. HRMS (FD<sup>+</sup>) *m/z* calc. for [C<sub>26</sub>H<sub>34</sub>N<sub>2</sub>O<sub>1</sub>]<sup>+</sup> 390.2671 found 390.2737.



### Reaction copper catalyzed reaction of **1i** with **2a** and **3a**

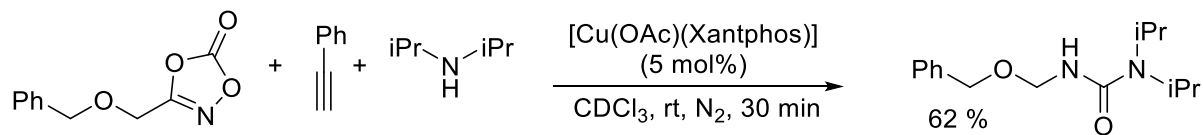

In a  $\text{N}_2$ -filled glovebox, a 2 mL vial was charged with a solution of  $[\text{Cu}(\text{OAc})(\text{Xantphos})]$  (8.8 mg, 12.5  $\mu\text{mol}$ ) and phenylacetylene (55  $\mu\text{L}$ , 0.5 mmol) in  $\text{CDCl}_3$  (0.5 mL). Then, diisopropylamine (70  $\mu\text{L}$ , 0.5 mmol) and **1i** (52 mg, 0.25 mmol) were added. After stirring for 30 minutes, the reaction mixture was removed from the glovebox and analyzed by  $^1\text{H}$ -NMR. Clearly, the uream *N,N*-diisopropyl-*N'*-benzyloxymethylurea was the main product in the crude NMR spectra (62% yield, based on trimethoxybenzene as the external standard).  $^1\text{H}$  NMR (500 MHz, chloroform-*d*)  $\delta$  7.39 – 7.14 (m, 5H), 5.15 (br, 1H), 4.86 (d,  $J = 6.8$  Hz, 2H), 4.59 (s, 2H), 3.81 (hept,  $J = 6.9$  Hz, 2H), 1.21 (d,  $J = 6.9$  Hz, 12H). The desired product 2-(benzyloxy)-*N*-(1-(diisopropylamino)-2-phenylethylidene)acetamide could not be isolated.

### Uncatalyzed reaction of **1a** with **3a**

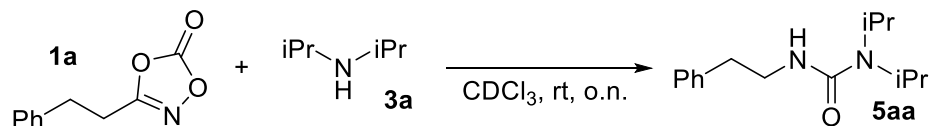

To a solution of **1a** (48 mg, 0.25 mmol) in  $\text{CDCl}_3$  was added diisopropylamine (70  $\mu\text{L}$ , 0.5 mmol). After stirring overnight at r.t., a  $^1\text{H}$ -NMR spectrum was recorded showing full conversion of **1a** to *N,N*-diisopropyl-*N'*-phenethylurea (**3a**)<sup>12</sup>.

## Kinetic Measurements

### General experiment preparation

The Man on the Moon X102 kit<sup>13</sup> was used to measure the pressure buildup during the reaction. Oxygen was removed from amylene-stabilized  $\text{CHCl}_3$  by 3 freeze-pump-thaw cycles in a Schlenk flask attached to a  $\text{N}_2$ -filled Schlenk line. Phenylacetylene was distilled and degassed by bubbling with  $\text{N}_2$ . Diisopropylamine was degassed by bubbling with  $\text{N}_2$ .

### Determination of the kinetic order in [catalyst]

A stock solution  $A_{\text{Cat}}$  was prepared by dissolving **1a** (1.15 g, 6.03 mmol) in  $\text{CHCl}_3$  (8 mL). A stock solution  $B_{\text{Cat}}$  was prepared by dissolving phenylacetylene (1.76 mL, 16 mmol) in  $\text{CHCl}_3$  (40 mL). To the flask of the X102 kit, with the valve open towards a Schlenk line equipped with a magnetic stir bar, was added  $[\text{Cu}(\text{OAc})(\text{Xantphos})]$  ( $X_{\text{Cat}}$  mg, 0.0177-0.0820 mmol). The flask was purged with  $\text{N}_2$  after which solution  $B_{\text{Cat}}$  (2.5 mL) was added. When diisopropylamine (140  $\mu\text{L}$ ) was added, the solution turned yellow. Then solution  $A_{\text{Cat}}$  (0.5 mL) was added and the valve was directly switched to the pressure transducer to collect the pressure buildup.

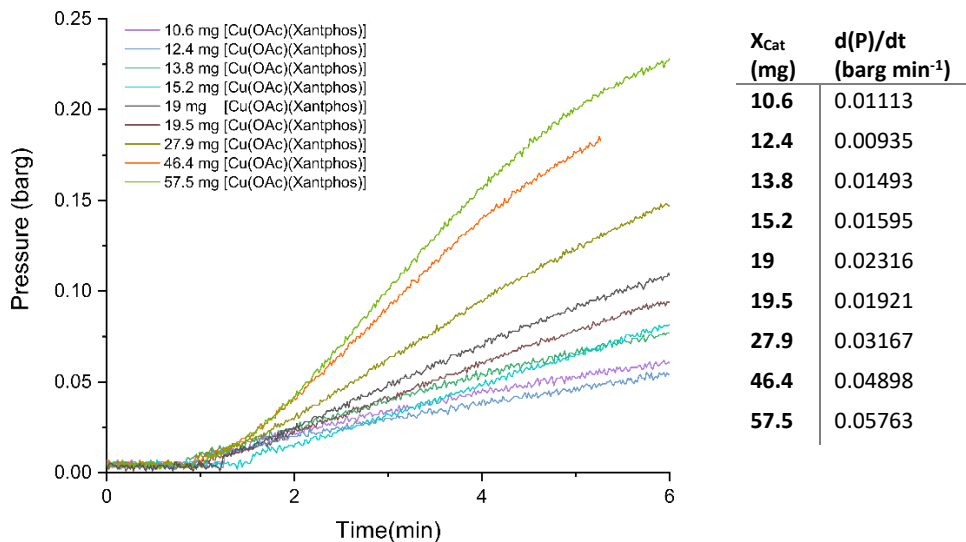

### Determination of the kinetic order in [dioxazolone]

A stock solution  $A_{\text{Diox}}$  was prepared by dissolving **1a** (1.15 g, 6.03 mmol) in  $\text{CHCl}_3$  (6 mL). A stock solution  $B_{\text{Diox}}$  was prepared by dissolving phenylacetylene (1.32 mL, 12 mmol) in  $\text{CHCl}_3$  (12 mL). A stock solution  $C_{\text{Diox}}$  was prepared by dissolving  $[\text{Cu}(\text{OAc})(\text{Xantphos})]$  (210 mg, 0.30 mmol) in  $\text{CHCl}_3$  (12 mL). To the flask of the X102 kit, with the valve open towards a Schlenk line equipped with a magnetic stir bar, was added solution  $C_{\text{Diox}}$  (1 mL), followed by addition of solution  $B_{\text{Diox}}$  (1 mL). Then was added  $\text{CHCl}_3$  (1- $X_{\text{Diox}}$  mL). When diisopropylamine (140  $\mu\text{L}$ ) was added, the solution turned yellow. Then solution  $A_{\text{Diox}}$  ( $X_{\text{Diox}}$  mL) was added and the valve was directly switched to the pressure transducer to collect the pressure buildup.

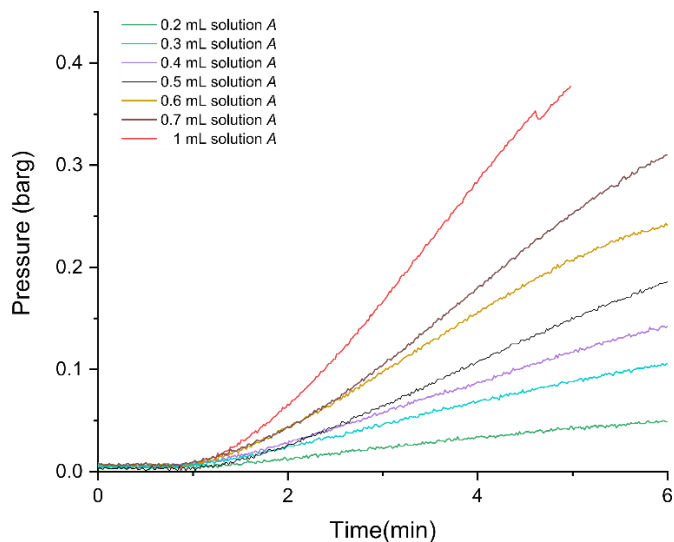

| $X_{\text{Diox}}$<br>(mL) | $d(P)/dt$<br>(barg min <sup>-1</sup> ) |
|---------------------------|----------------------------------------|
| <b>1</b>                  | 0.114104                               |
| <b>0.7</b>                | 0.073457                               |
| <b>0.6</b>                | 0.056807                               |
| <b>0.5</b>                | 0.042929                               |
| <b>0.4</b>                | 0.029383                               |
| <b>0.3</b>                | 0.022037                               |
| <b>0.2</b>                | 0.009305                               |

### Determination of the kinetic order in [phenylacetylene]

A stock solution  $A_{\text{PhCCH}}$  was prepared by dissolving **1a** (2.69 g, 6.03 mmol) in  $\text{CHCl}_3$  (14 mL). A stock solution  $B_{\text{PhCCH}}$  was prepared by dissolving phenylacetylene (3.08 mL, 12 mmol) in  $\text{CHCl}_3$  (28 mL). A stock solution  $C_{\text{PhCCH}}$  was prepared by dissolving  $[\text{Cu}(\text{OAc})(\text{Xantphos})]$  (490 mg, 0.70 mmol) in  $\text{CHCl}_3$  (28 mL). To the flask of the X102 kit, with the valve open towards a Schlenk line equipped with a magnetic stir bar, was added solution  $C_{\text{PhCCH}}$  (1 mL), followed by addition of solution  $B_{\text{PhCCH}}$  ( $X_{\text{PhCCH}}$  mL). Then was added  $\text{CHCl}_3$  ( $1.5 - X_{\text{PhCCH}}$  mL). When diisopropylamine (140  $\mu\text{L}$ ) was added, the solution turned yellow. Then solution  $A_{\text{PhCCH}}$  (0.5 mL) was added and the valve was directly switched to the pressure transducer to collect the pressure buildup.

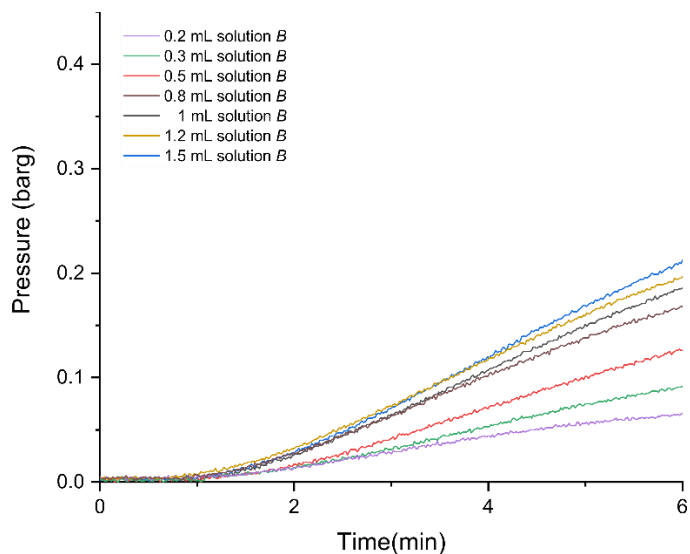

| $X_{\text{PhCCH}}$<br>(mL) | $d(P)/dt$<br>(barg min <sup>-1</sup> ) |
|----------------------------|----------------------------------------|
| <b>1.5</b>                 | 0.049495                               |
| <b>1.2</b>                 | 0.043565                               |
| <b>1</b>                   | 0.042929                               |
| <b>0.8</b>                 | 0.038057                               |
| <b>0.5</b>                 | 0.029798                               |
| <b>0.3</b>                 | 0.020854                               |
| <b>0.2</b>                 | 0.015023                               |

### Determination of the kinetic order in $[iPr_2NH]$

To the flask of the X102 kit, with the valve open towards a Schlenk line equipped with a magnetic stir bar, was added solution  $C_{PhCCH}$  (1 mL), followed by addition of solution  $B_{PhCCH}$  (1 mL). Then was added  $CHCl_3$  (0.5 mL). When diisopropylamine ( $X_{iPr_2NH}$   $\mu L$ ) was added, the solution turned yellow. Then solution  $A_{PhCCH}$  (0.5 mL) was added and the valve was directly switched to the pressure transducer to collect the pressure buildup.

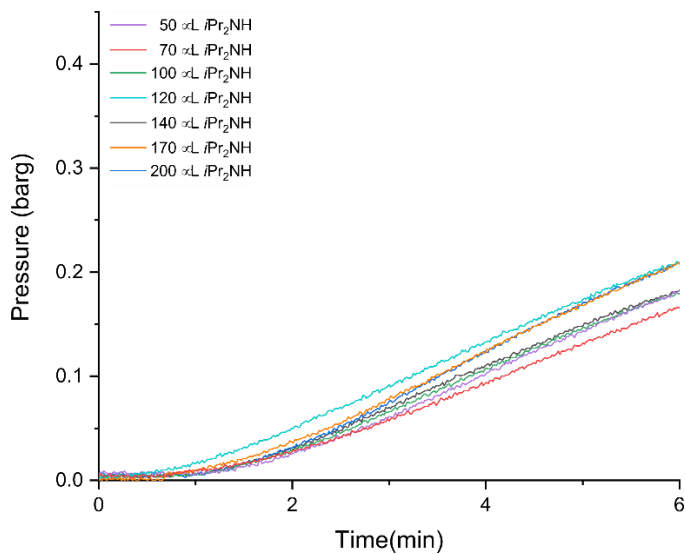

| $X_{iPr_2NH}$<br>( $\mu L$ ) | $d(P)/dt$<br>(barg $min^{-1}$ ) |
|------------------------------|---------------------------------|
| <b>200</b>                   | 0.045989                        |
| <b>170</b>                   | 0.044643                        |
| <b>140</b>                   | 0.039876                        |
| <b>120</b>                   | 0.041445                        |
| <b>100</b>                   | 0.038501                        |
| <b>70</b>                    | 0.036087                        |
| <b>50</b>                    | 0.039652                        |

## Formation of [(Xantphos)Cu(CCPH)].

To investigate the formation of [(Xantphos)Cu(CCPH)], we used  $^{31}\text{P}$ -NMR spectroscopy. We envisioned this to be the easiest way to validate the formation of this species. As a benchmark, we formed [(Xantphos)Cu(CCPH)] in different ways. All spectra for this study were measured in  $\text{CDCl}_3$ .

### 1. [CuCCPh]+Xantphos

In an  $\text{N}_2$ -filled glovebox, a vial was charged with [Cu(CCPH)] (74 mg, 0.5 mmol) and Xantphos (281 mg, 0.5 mmol). Dry, degassed DCM (6 mL) was added and after 2h of stirring under a nitrogen atmosphere, the reaction turned into a green suspension. The reaction mixture was filtered. a sample (0.5 mL) was taken from the filtrate for NMR spectroscopy and dry, degassed pentane (60 mL) was added to the remaining solution. After 1 week, small crystals were formed that were determined to be [(Xantphos) $_2$ Cu $_3$ (CCPh) $_3$ ] by X-ray diffraction (see page S24). The collected  $^{31}\text{P}$ -NMR spectra contains a minor signal for Xantphos (-18 ppm), a sharp signal at -15.6 ppm and a large broad signal at -12.8 ppm, which likely results from the trinuclear species [(Xantphos) $_2$ Cu $_3$ (CCPh) $_3$ ]. After exposing to air overnight, the signal at -15.6 ppm disappeared and a signal at -17.7 ppm appeared together with the formation of Xantphos-*P*-dioxide (27.5 ppm). [(Xantphos) $_2$ Cu $_3$ (CCPh) $_3$ ] seems to be stable in air.

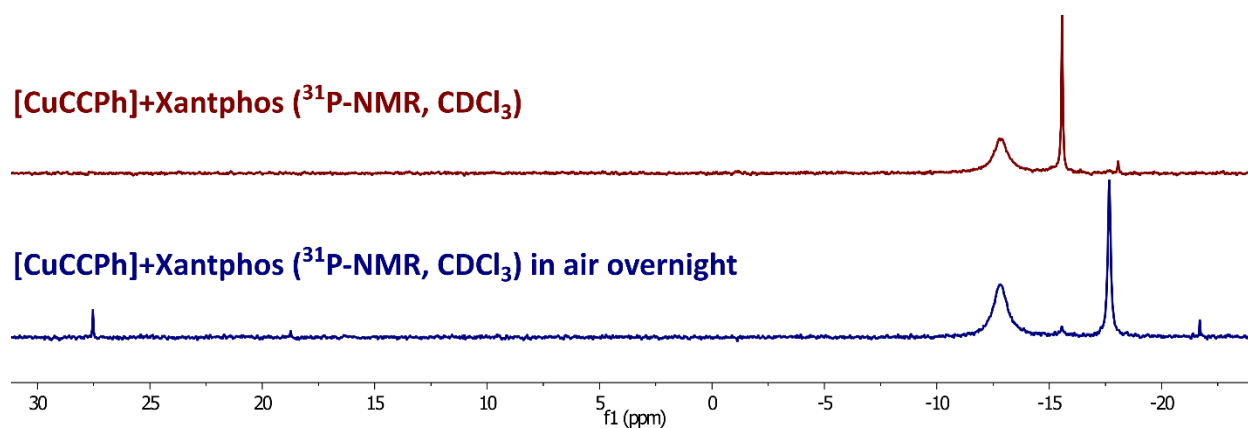

### 2. [(Xantphos)CuCl] + [LiCCPh]

In an  $\text{N}_2$ -filled glovebox, [(Xantphos)CuCl] (339 mg, 0.5 mmol) was suspended in dry, degassed THF. Then, dropwise, a solution of [LiCCPh] in THF (0.5 mL, 1M, 0.5 mmol) was added dropwise and the reaction mixture turned yellow. After stirring for 1h, the solvent was removed *in vacuo* and dry, degassed DCM (2 mL) was added. The suspension was filtered and the filtrate was concentrated *in vacuo* to give yellow powder. The collected  $^{31}\text{P}$ -NMR spectra contained a minor broad signal at -12.8 ppm, a sharp signal at -15.6 ppm and a Xantphos signal (-18 ppm). Formation of insoluble polymeric [CuCCPh] $_n$  could be an explanation for the dissociation of Xantphos.

[CuCl(Xantphos)]

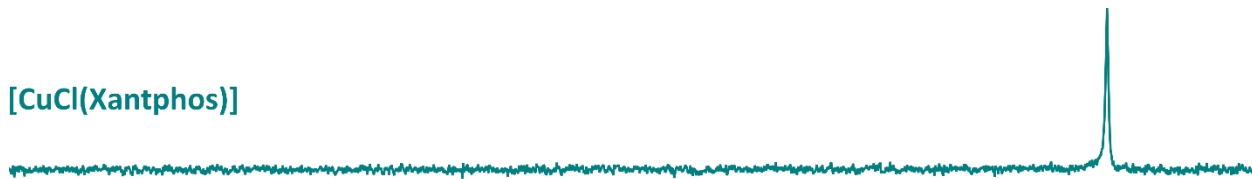

[CuCl(Xantphos)] + [LiCCPh]

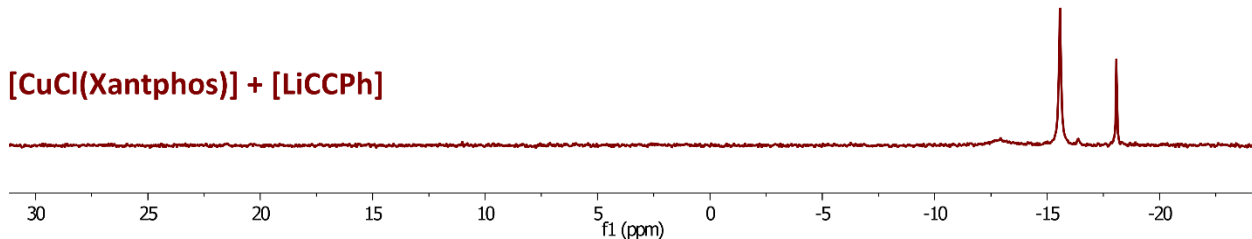

### 3. [Cu(OAc)(Xantphos)] + PhCCH + *i*Pr<sub>2</sub>NH

In a 2 mL vial, a stock solution of [Cu(OAc)(Xantphos)] (8.8 mg, 12.5 μmol) was dissolved in CDCl<sub>3</sub> (1 mL). No reaction was observed when to 0.5 mL of the stock solution was added either PhCCH (55 μL, 0.5 mmol) or *i*Pr<sub>2</sub>NH (70 μL, 0.5 mmol). When to the solution of [Cu(OAc)(Xantphos)], CDCl<sub>3</sub> and PhCCH was added *i*Pr<sub>2</sub>NH (70 μL, 0.5 mmol), direct color change to yellow was observed. After 5 minutes of stirring, a <sup>31</sup>P-NMR spectrum was recorded which did not show a signal at -15.6 ppm. We did observe Xantphos-*P*-dioxide (27.5 ppm) and the broad signal at -12.8 ppm.

Performing the same reaction under an atmosphere of N<sub>2</sub>, does show a <sup>31</sup>P-NMR signal at -15.6 ppm. If only one equivalent of phenylacetylene and *i*Pr<sub>2</sub>NH is used, no reaction was observed.

[Cu(OAc)(Xantphos)]

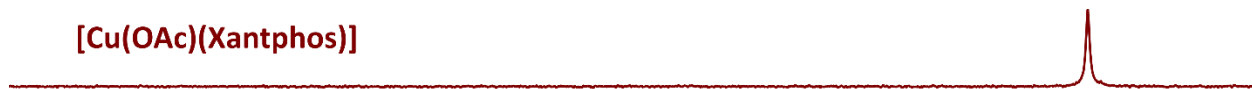

[Cu(OAc)(Xantphos)] + PhCCH + *i*Pr<sub>2</sub>NH (air)

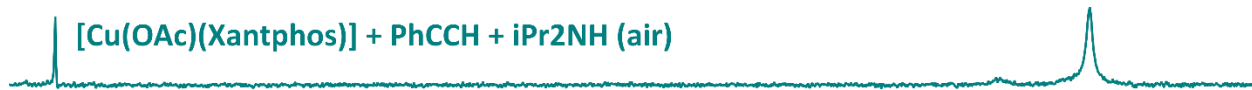

[Cu(OAc)(Xantphos)] + PhCCH + *i*Pr<sub>2</sub>NH (N<sub>2</sub>)

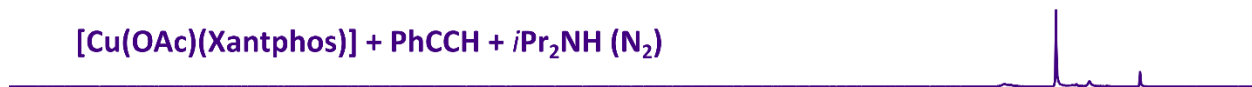

[Cu(OAc)(Xantphos)] + 1 eq. PhCCH + 1 eq. *i*Pr<sub>2</sub>NH

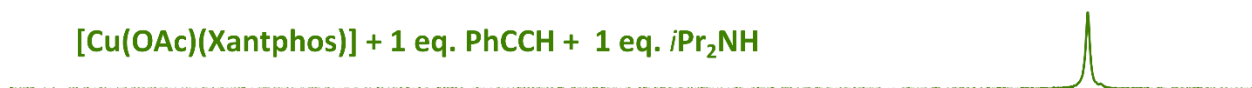

By HRMS (CS+), the  $[(\text{Xantphos})\text{Cu}(\text{CCPh})-\text{Cu}]^+$  and  $\{[(\text{Xantphos})\text{Cu}(\text{CCPh})]_2-\text{Cu}\}^+$  were observed.

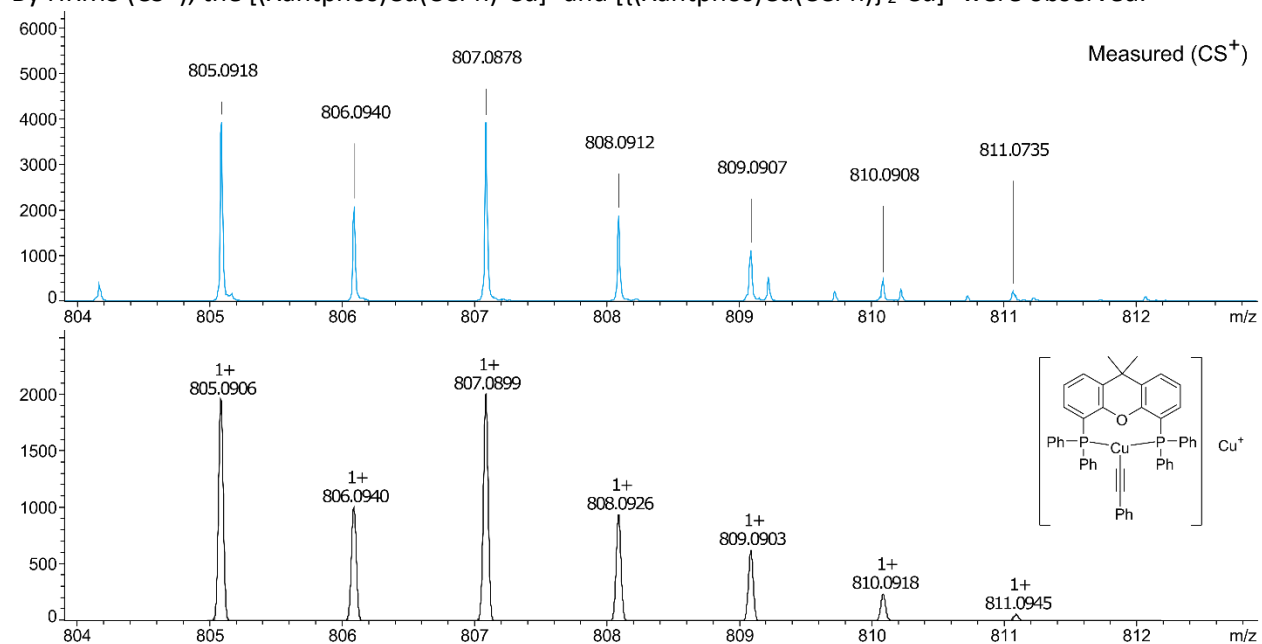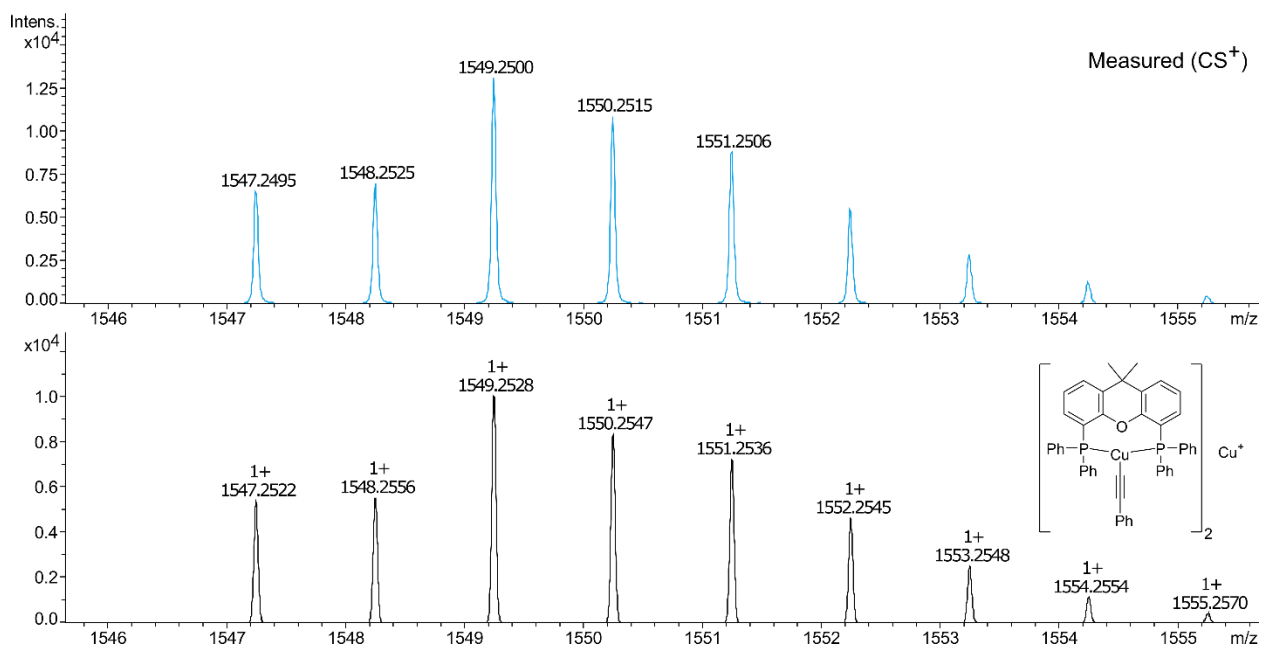

## H/D-Exchange Experiment

The (ethynyl-D)benzene used for this experiment was 94% pure (with THF residue) and 90% deuterated.

A stock solution (Stock A) was prepared by adding (ethynyl-D)benzene (0.12 mL, 1.0 mmol) and 4-ethynyl- $\alpha,\alpha,\alpha$ -trifluorotoluene (0.16 mL, 1.0 mmol) to dry, degassed  $\text{CDCl}_3$  (2 mL). To  $[\text{Cu}(\text{OAc})(\text{Xantphos})]$  (17.5 mg, 0.025 mmol) was added a part of stock A (1 mL). After stirring both mixtures for 1 h,  $^1\text{H-NMR}$  spectra were recorded, which showed H/D scrambling only for the solution containing the catalyst. Combined with the  $^{31}\text{P-NMR}$  studies described in the main text, these data confirm the presence of (slightly) endergonic equilibrium reactions of the type  $[\text{Cu}(\text{OAc})(\text{Xantphos})] + \text{HCC}(\text{Aryl}) \rightleftharpoons [\text{Cu}(\text{CCAr}(\text{yl}))(\text{Xantphos})] + \text{HOAc}$ , in good agreement with the proposed mechanism shown in Scheme 3 and Figure 6 of the main text.

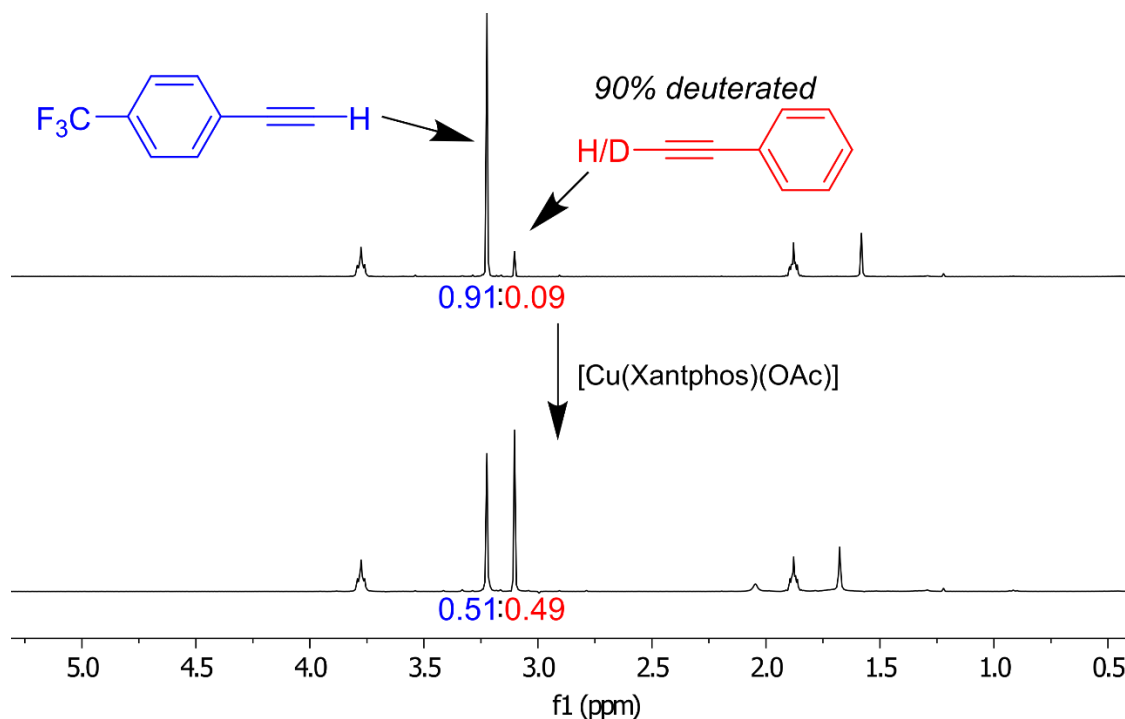

## X-ray Crystal Structure Determination

X-ray intensities were measured on a Bruker D8 Quest Eco diffractometer equipped with a Triumph monochromator ( $\lambda = 0.71073 \text{ \AA}$ ) and a CMOS Photon 100 detector at a temperature of 150(2) K. Intensity data were integrated with the Bruker APEX3 software.<sup>14</sup> Absorption correction and scaling was performed with SADABS.<sup>15</sup> The structures were solved using intrinsic phasing with the program SHELXT.<sup>16</sup> Least-squares refinement was performed with SHELXL-2014<sup>17</sup> against  $F^2$  of all reflections. Non-hydrogen atoms were refined with anisotropic displacement parameters. The H atoms were placed at calculated positions using the instructions AFIX 13, AFIX 43 or AFIX 137 with isotropic displacement parameters having values 1.2 or 1.5 times  $U_{\text{eq}}$  of the attached C atoms. CCDC 1937520 contain the supplementary crystallographic



data for this paper. These data can be obtained free of charge from The Cambridge Crystallographic Data Centre via <https://www.ccdc.cam.ac.uk/structures/>.

### [Cu(OAc)(Xantphos)]-HCCPh

The single crystal of [Cu(OAc)(Xantphos)]-HCCPh was obtained by slow vapor diffusion of pentane into a solution of [Cu(OAc)(Xantphos)] in phenylacetylene, and the molecular structure of the interaction species was determined by X-ray diffraction measurements. The figure below shows a displacement ellipsoid plot (50% probability level). Selected bond lengths are shown in the table below.

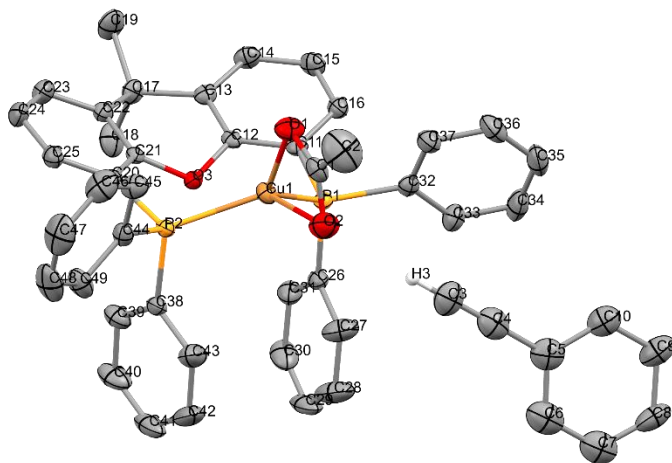

| Atoms  | Bond length (Å) |
|--------|-----------------|
| Cu1-O1 | 2.1124(18)      |
| Cu1-O2 | 2.313(2)        |
| C3-H3  | 0.95            |
| O2-H3  | 2.222           |
| O2-C3  | 3.160           |

| Atoms    | Angle (°) |
|----------|-----------|
| O2-H3-C3 | 169.62    |

C<sub>49</sub>H<sub>41</sub>CuO<sub>3</sub>P<sub>2</sub>, Fw = 803.30, shape, 0.429×0.362×0.178 mm, monoclinic, *P*2<sub>1</sub>/*c* (No: 14)), *a* = 13.1535(7), *b* = 18.2025(9), *c* = 17.8085(9) Å, β = 107.602(2)°, *V* = 4064.2(4) Å<sup>3</sup>, *Z* = 4, *D*<sub>x</sub> = 1.313 g/cm<sup>3</sup>, μ = 0.658 mm<sup>-1</sup>. 163955 Reflections were measured up to a resolution of (sin θ/λ)<sub>max</sub> = 0.81 Å<sup>-1</sup>. 7973 Reflections were unique (*R*<sub>int</sub> = 0.0448), of which 6537 were observed [*I* > 2σ(*I*)]. 563 Parameters were refined with 243 restraints. *R*<sub>1</sub>/*wR*<sub>2</sub> [*I* > 2σ(*I*)]: 0.0389/0.0949. *R*<sub>1</sub>/*wR*<sub>2</sub> [all refl.]: 0.0540/ 0.1087. *S* = 1.054. Residual electron density between -0.336 and 0.654 e/Å<sup>3</sup>. CCDC 1937520.

### [(Xantphos)<sub>2</sub>Cu<sub>3</sub>(CCPh)<sub>3</sub>]

Single crystals obtained from the reaction on page S21 proved of insufficient quality for a fully refined structure (*R*<sub>1</sub> = 0.14030). Therefore, only a preliminary connectivity plot is depicted to illustrate the

trinuclear nature of the complex. For clarity, protons and lattice solvent molecules are not displayed.

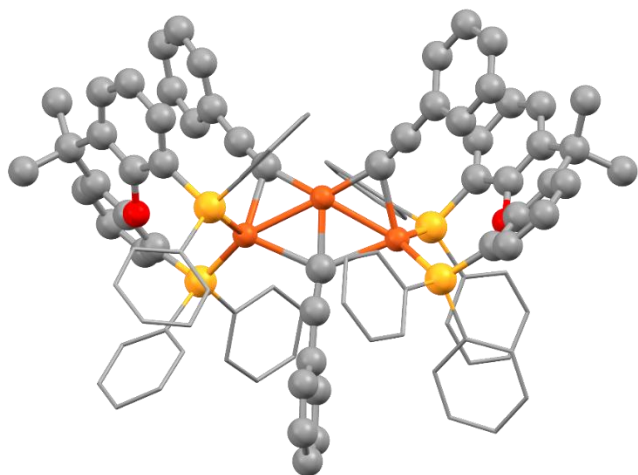

## Product NMR spectra

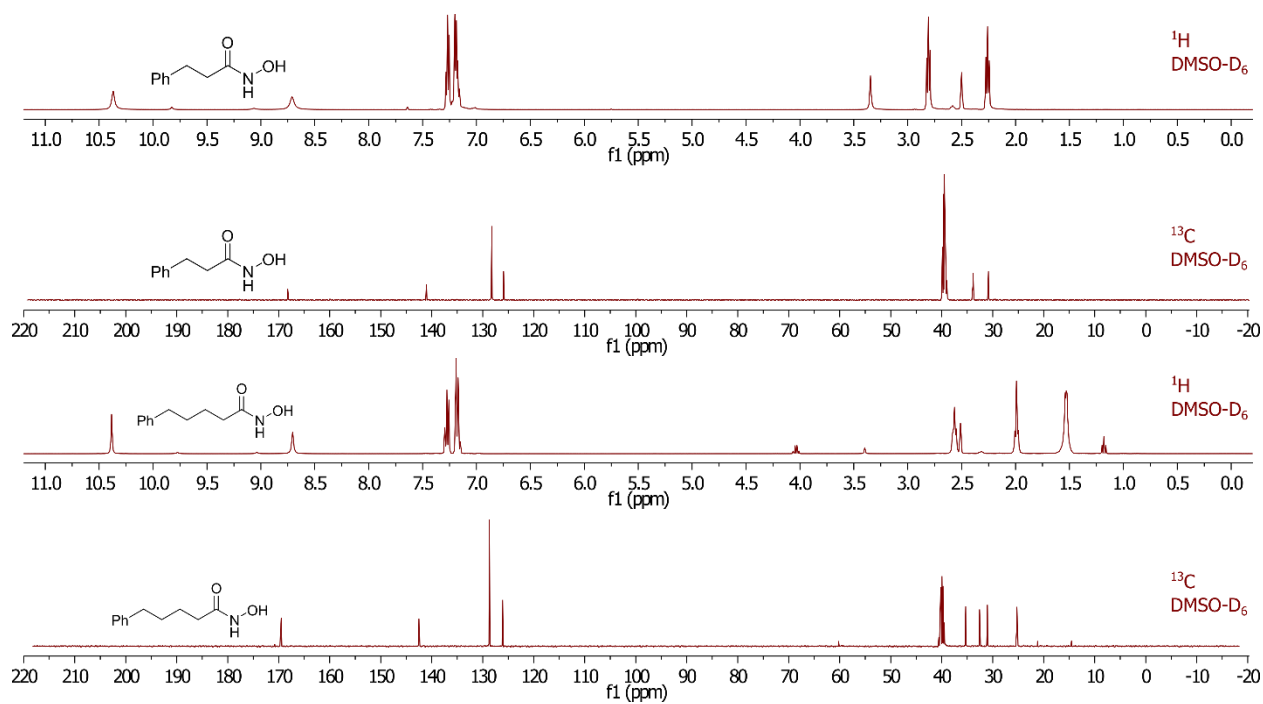

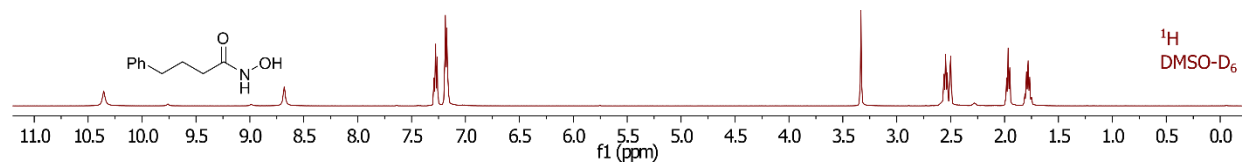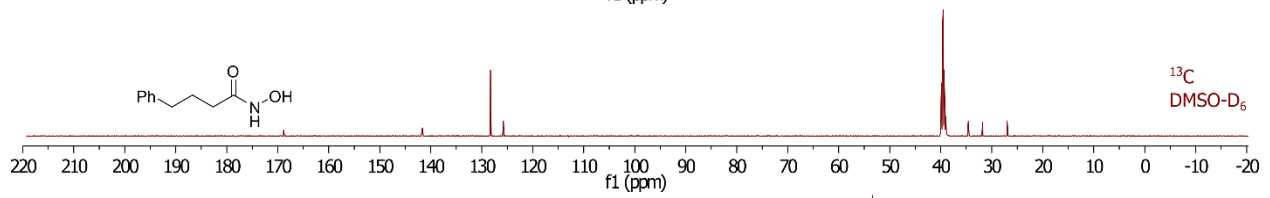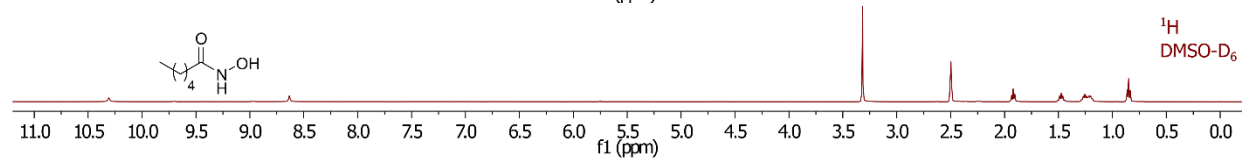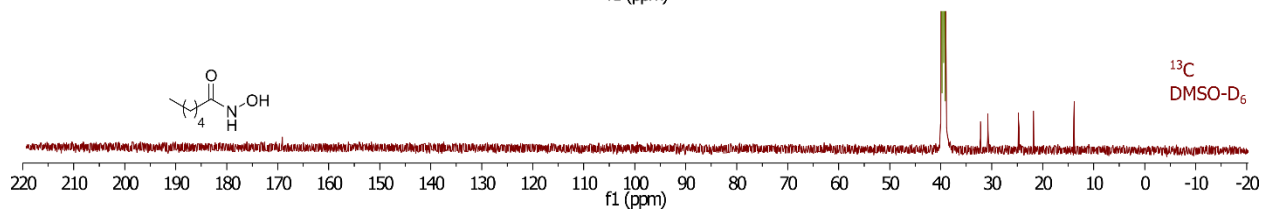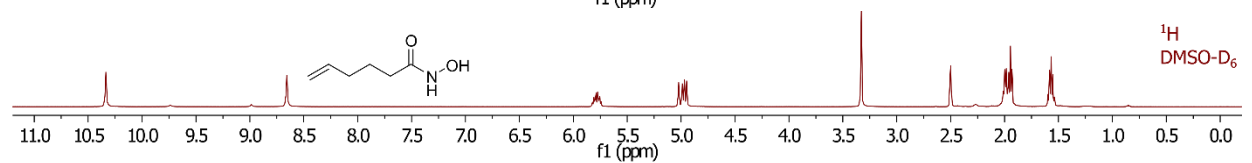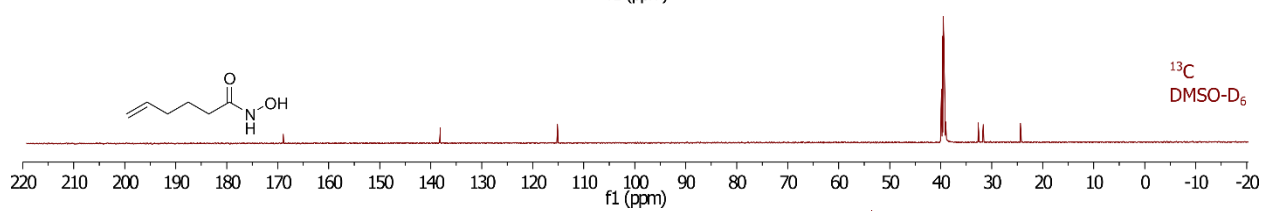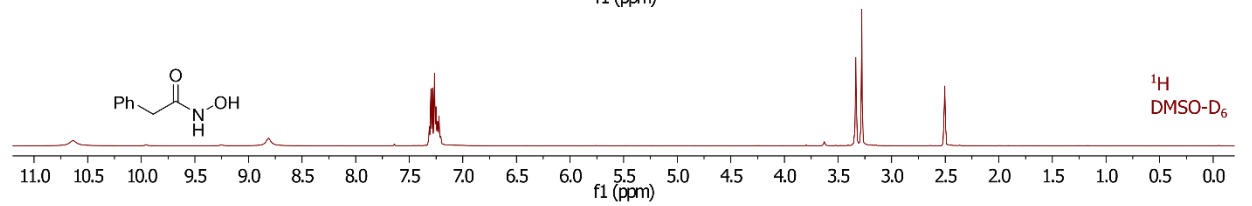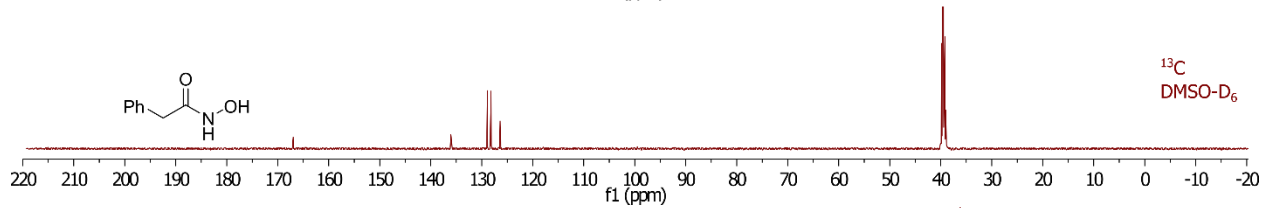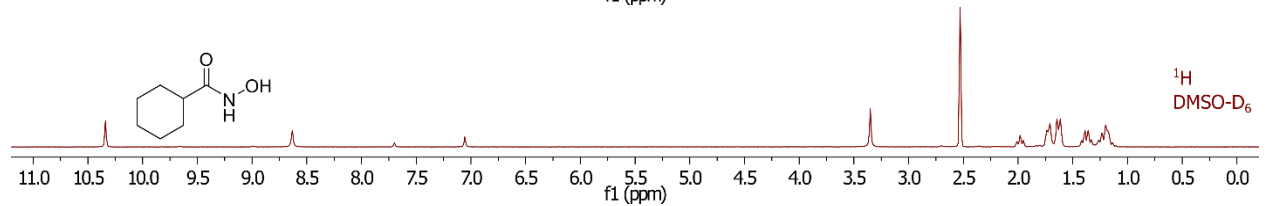

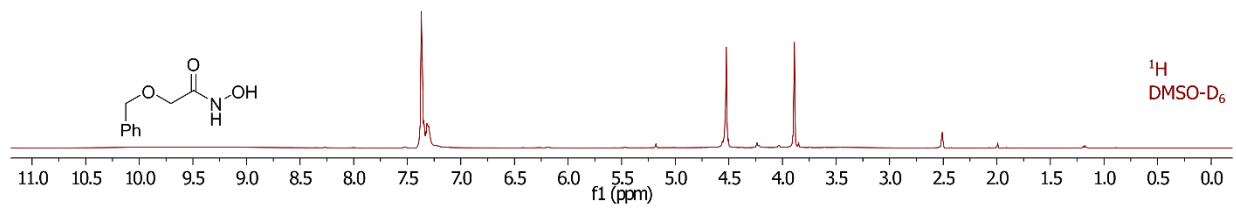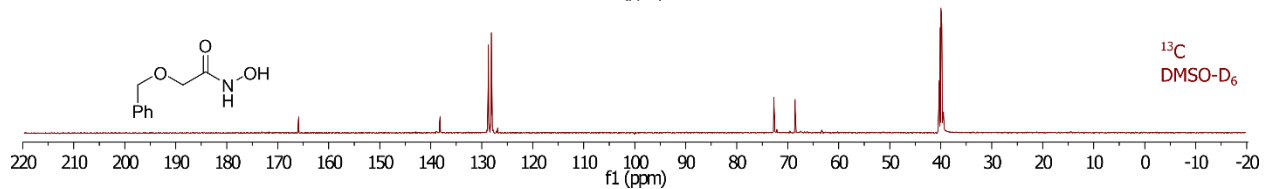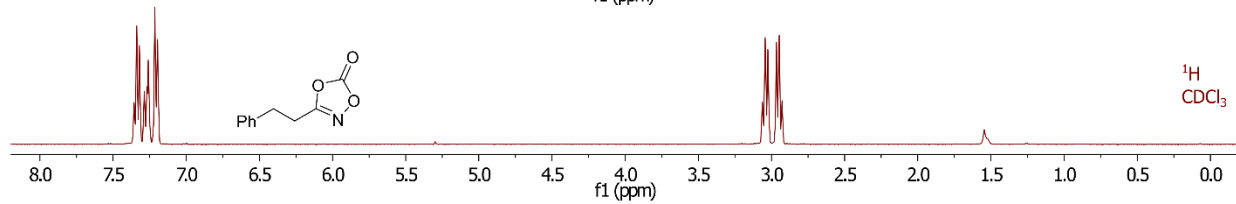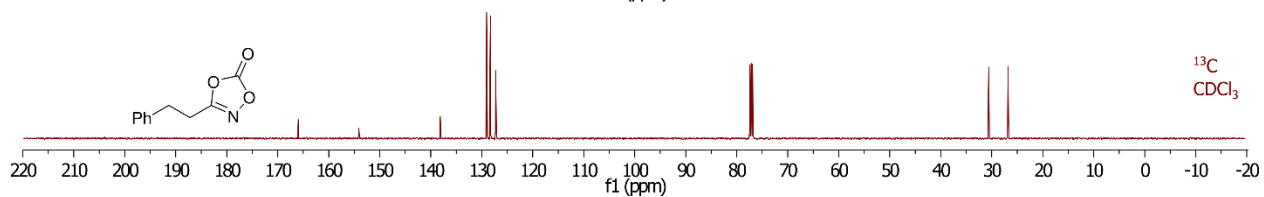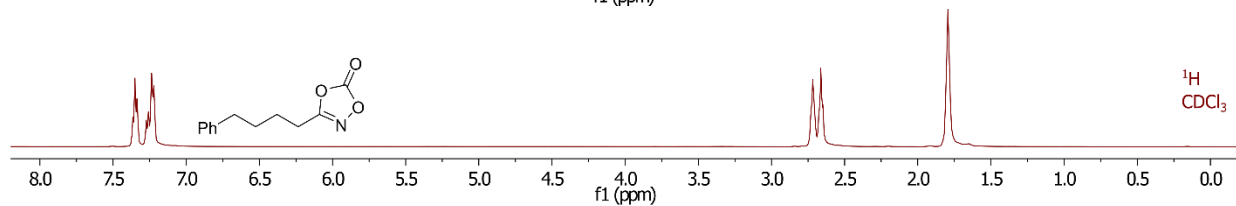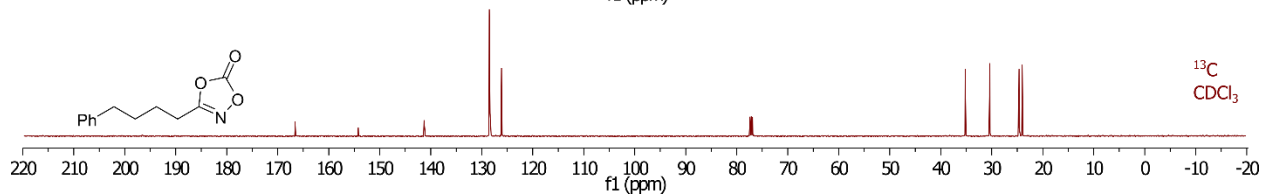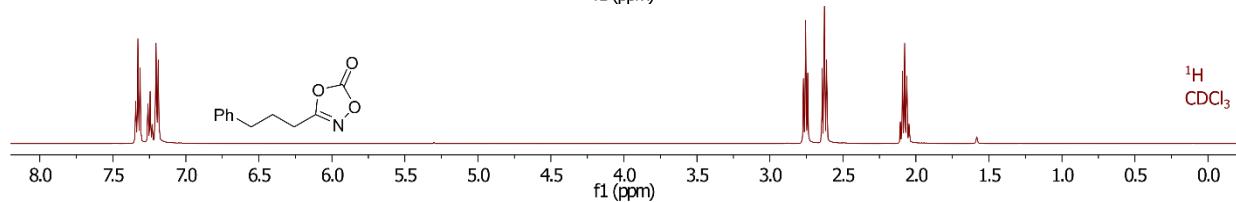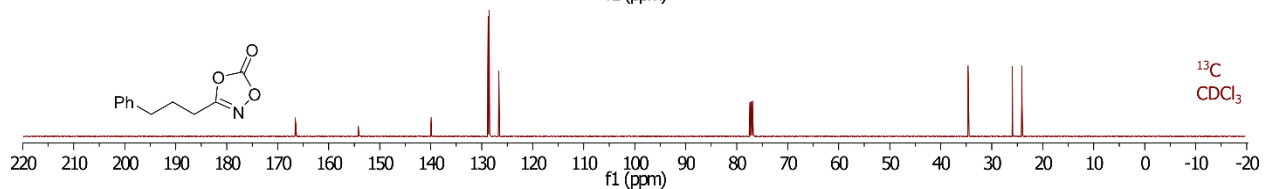

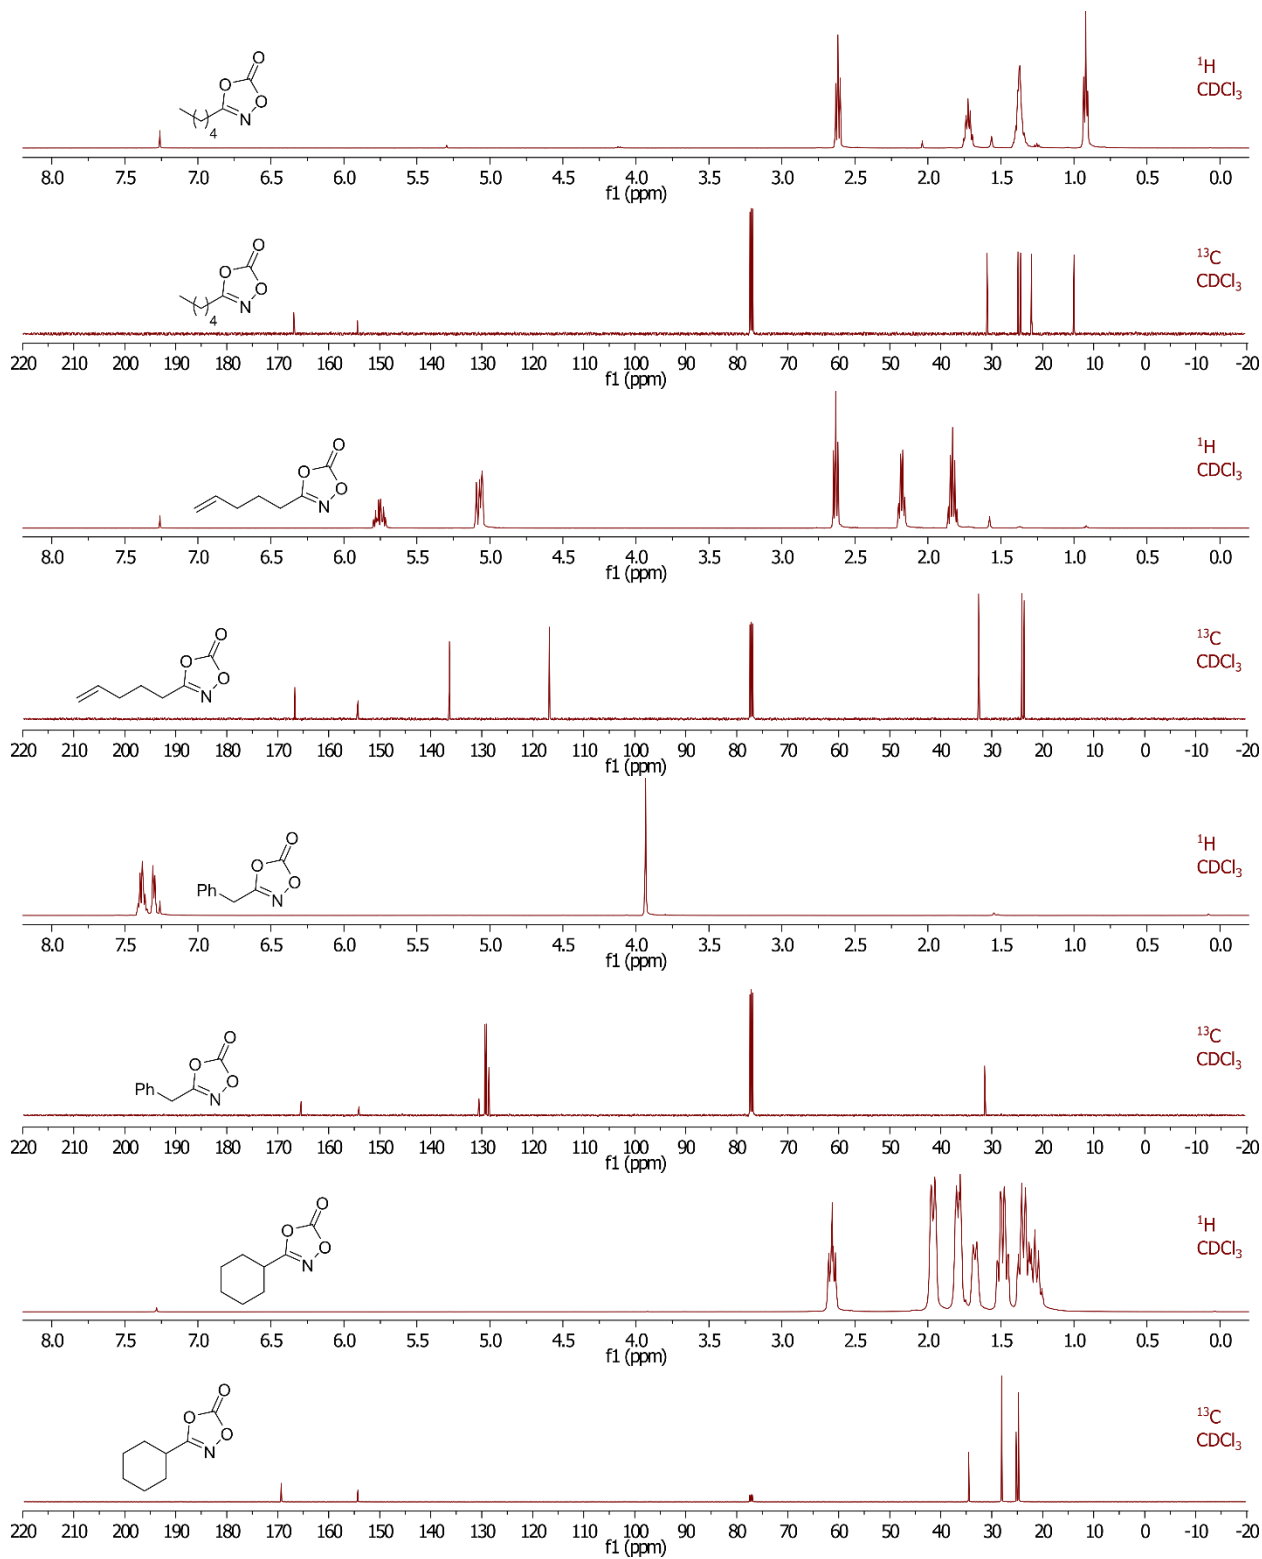

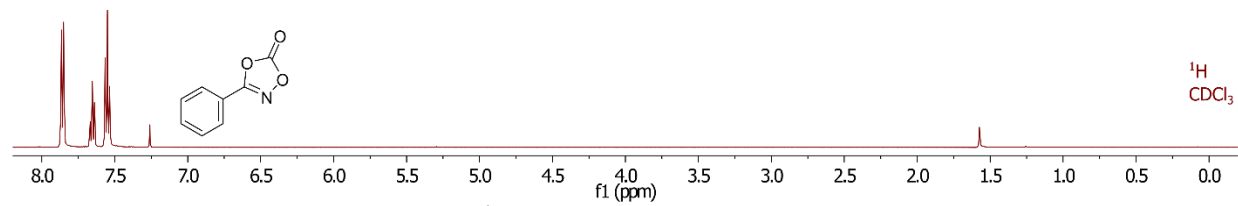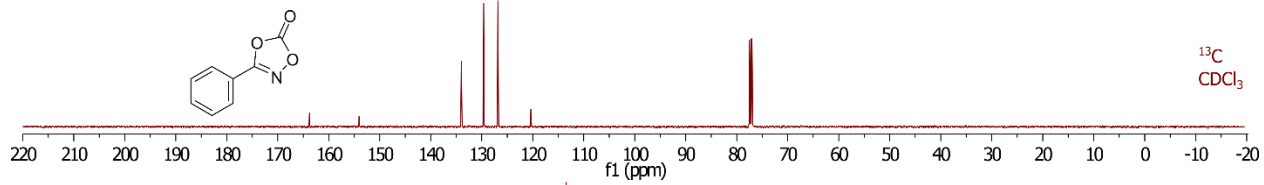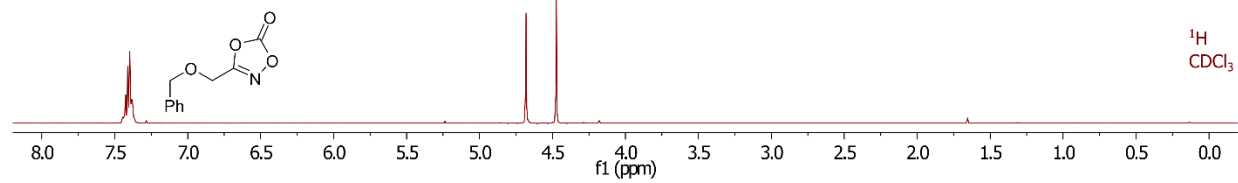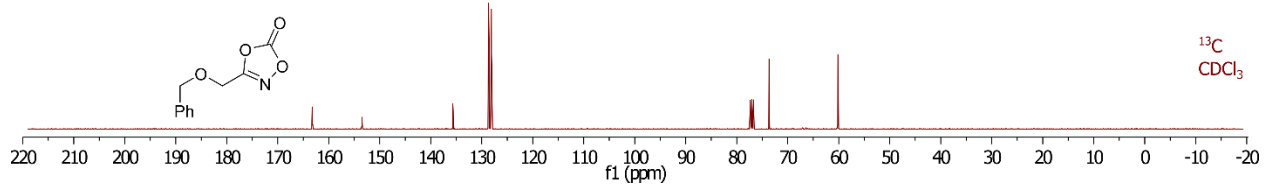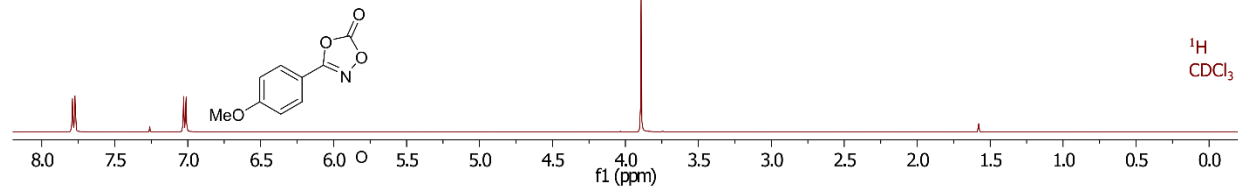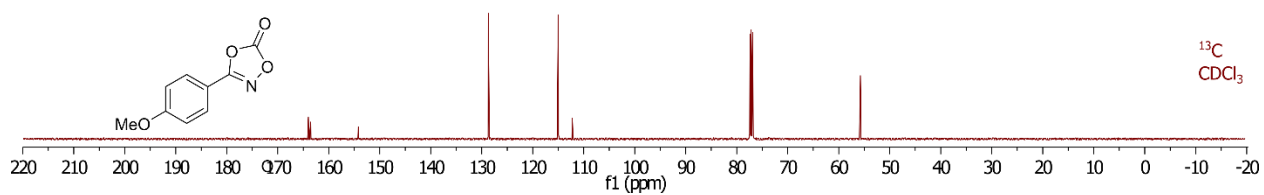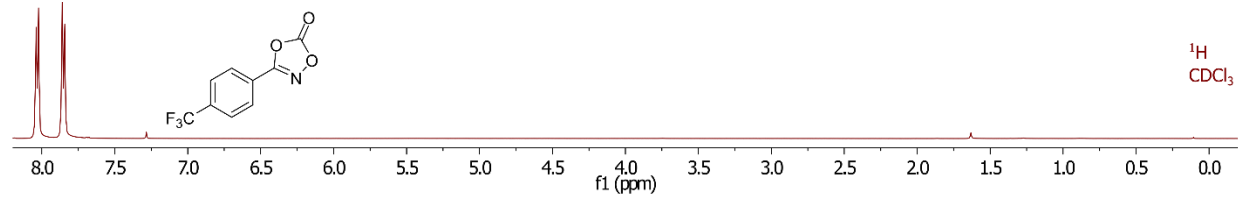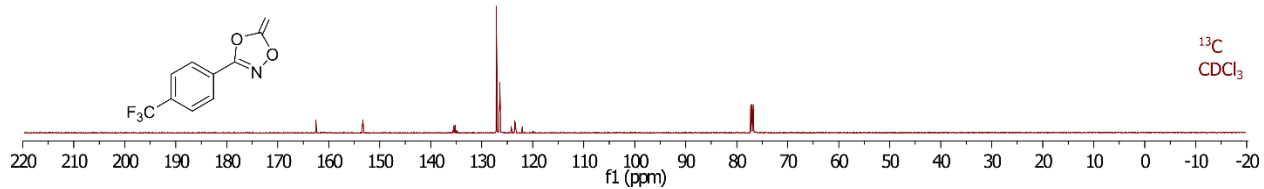

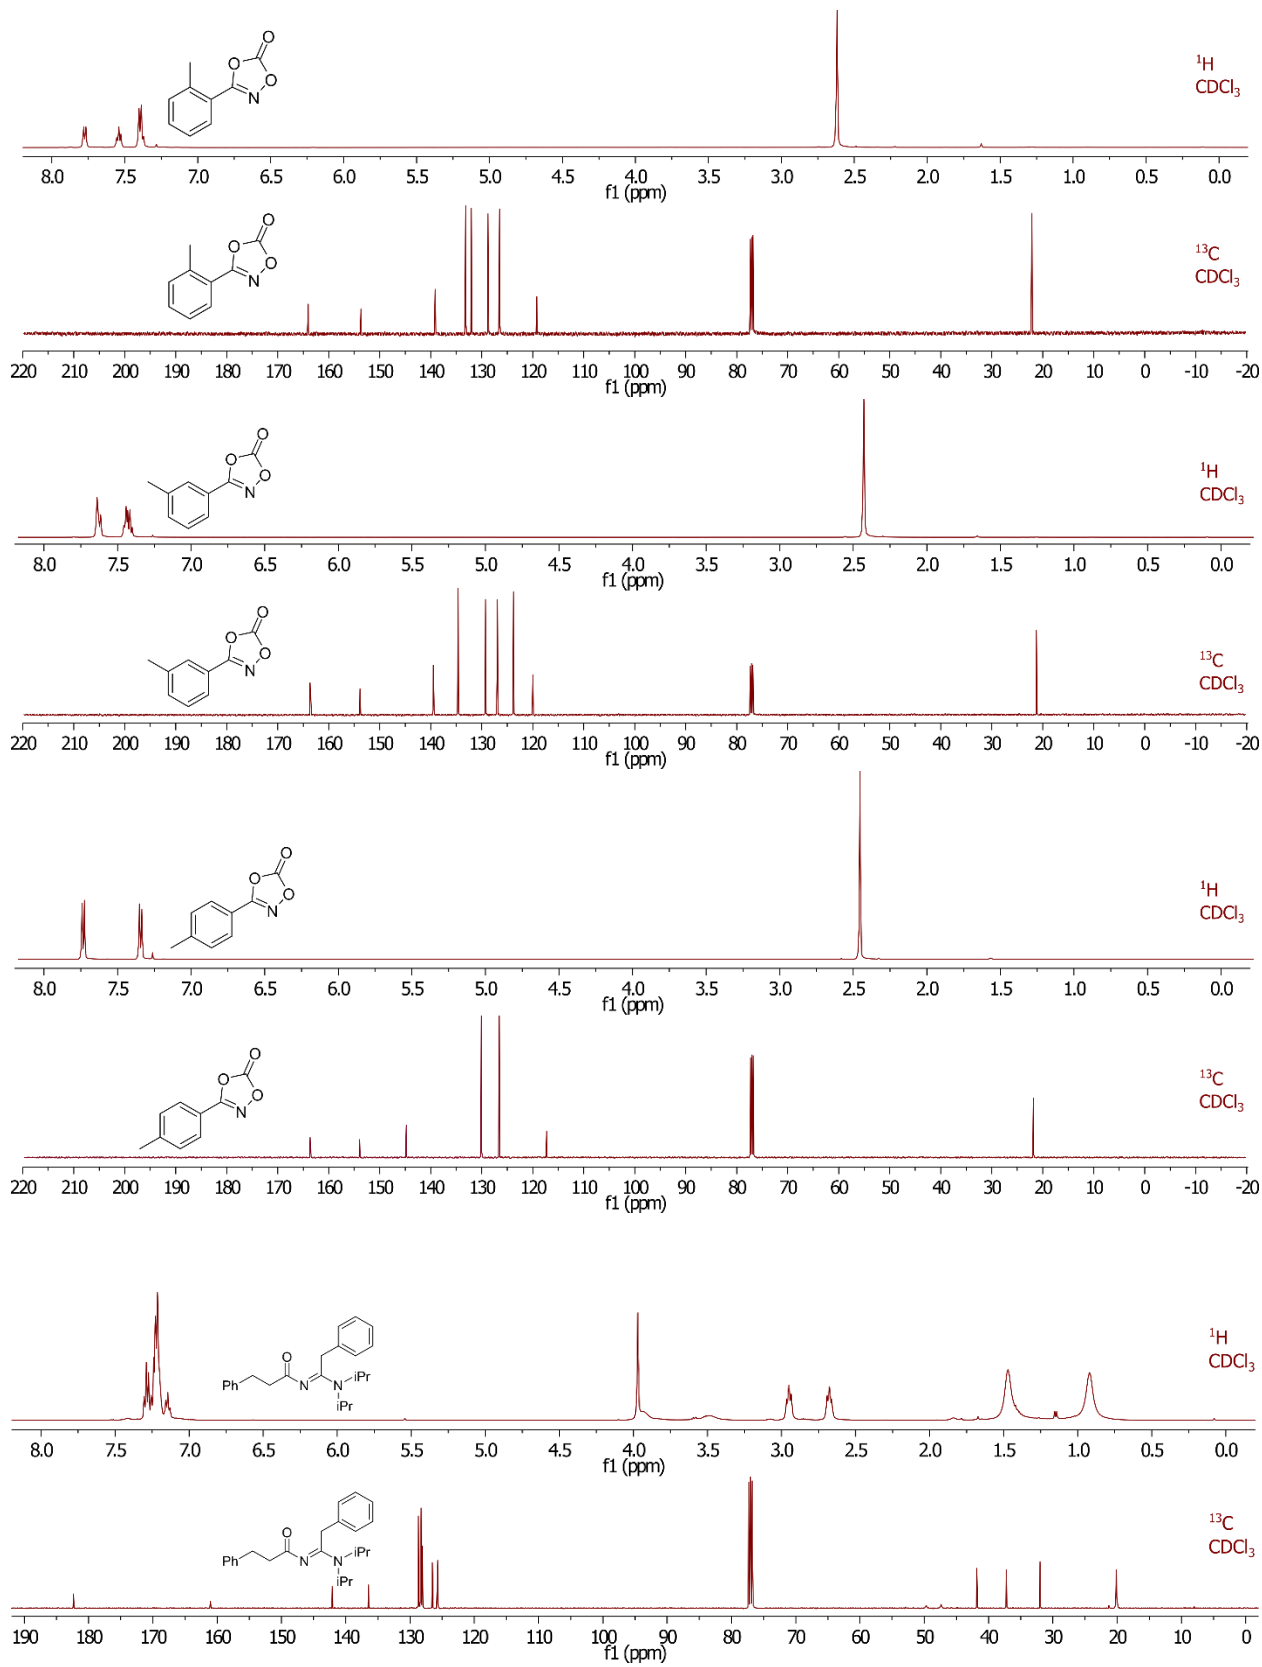

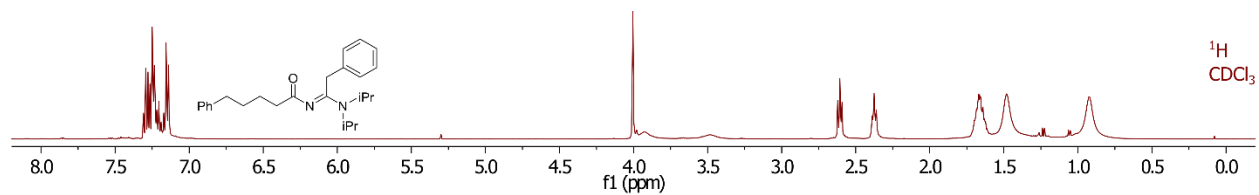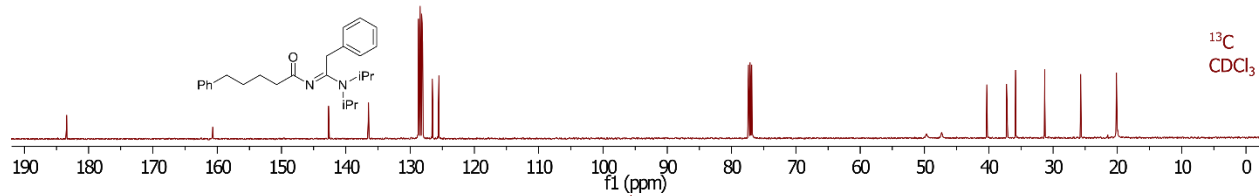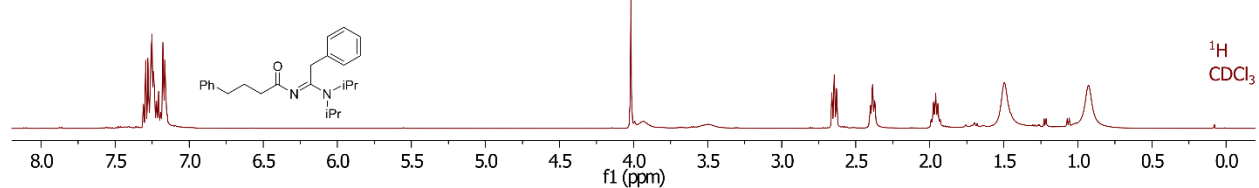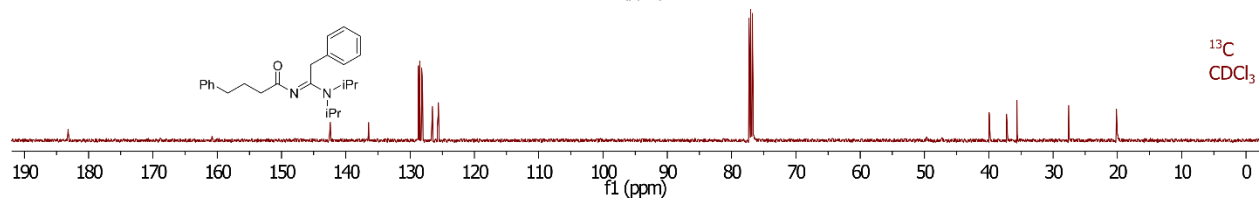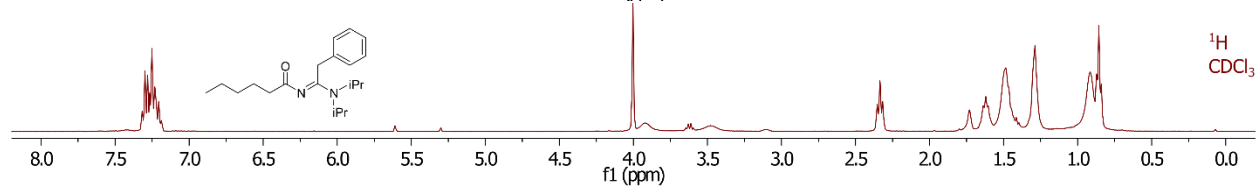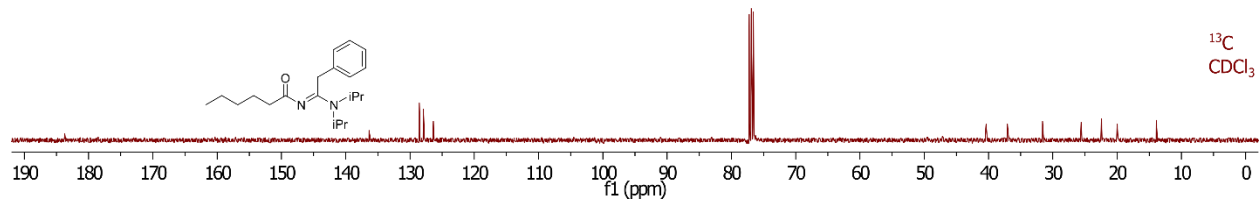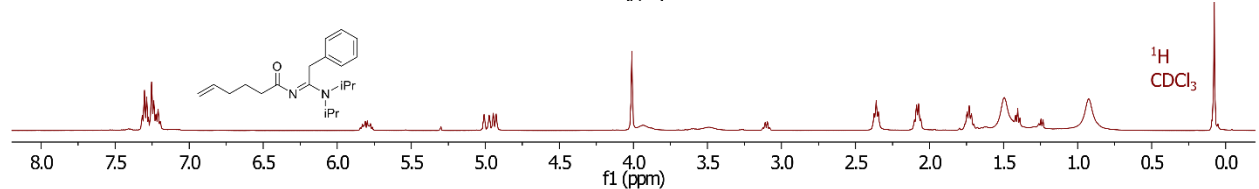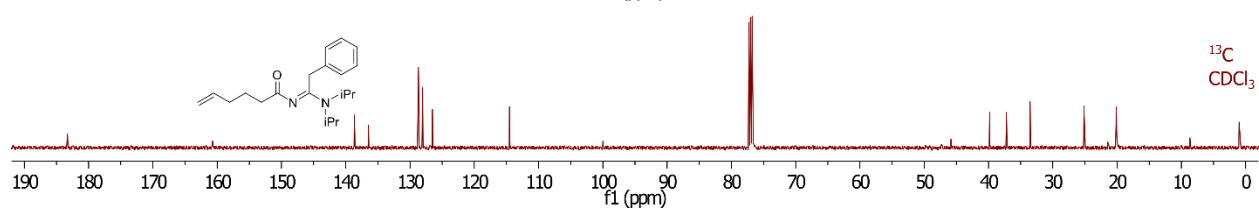



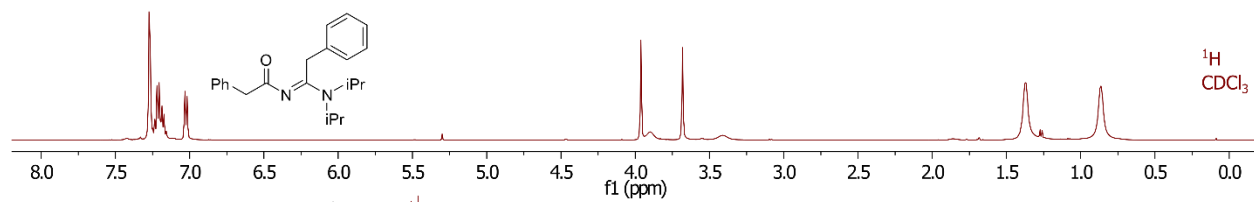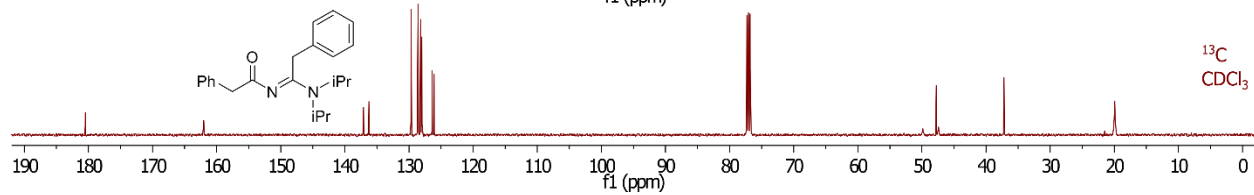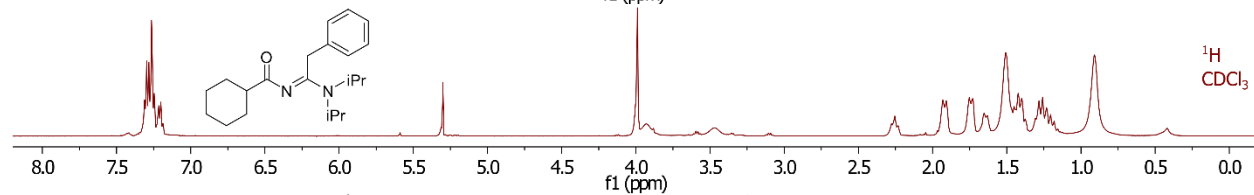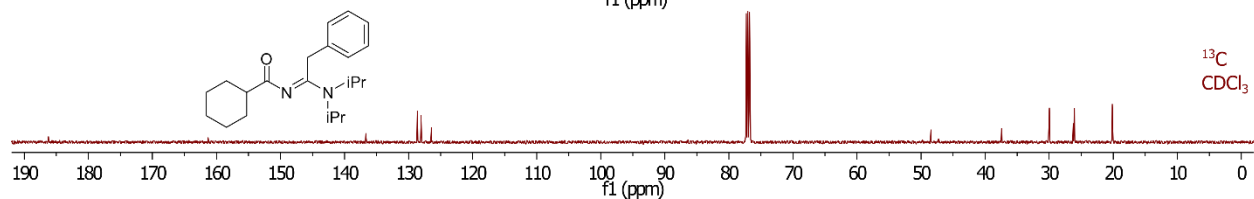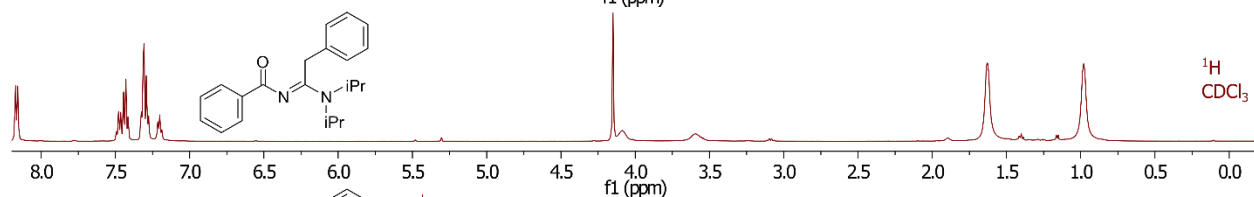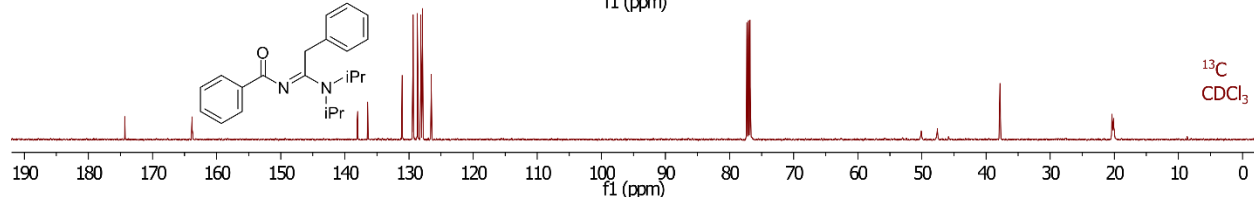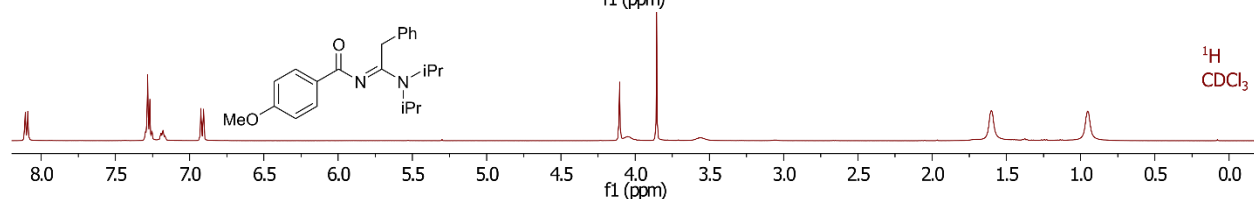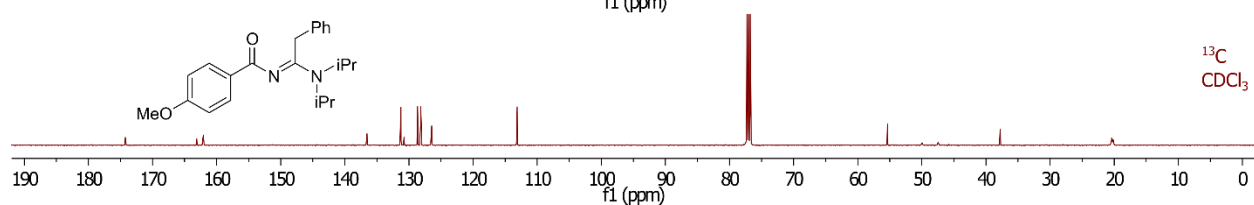

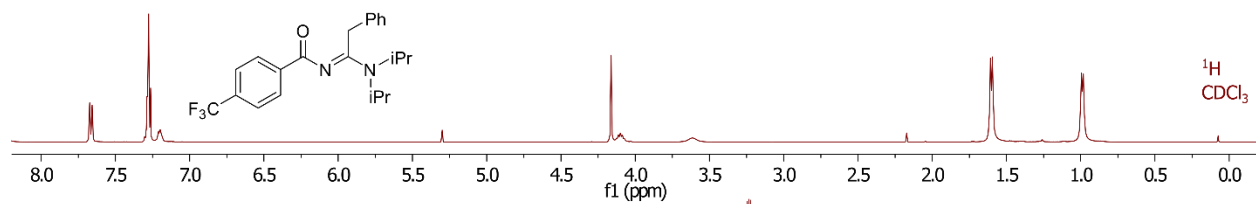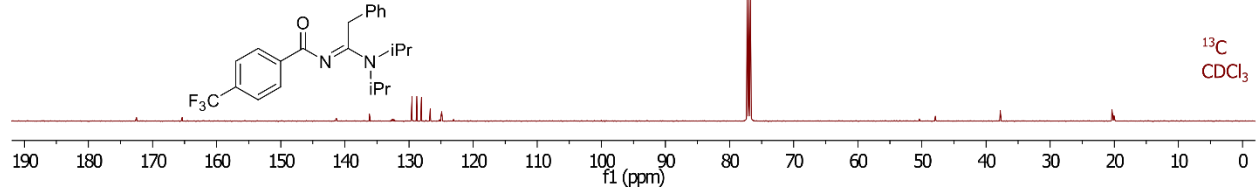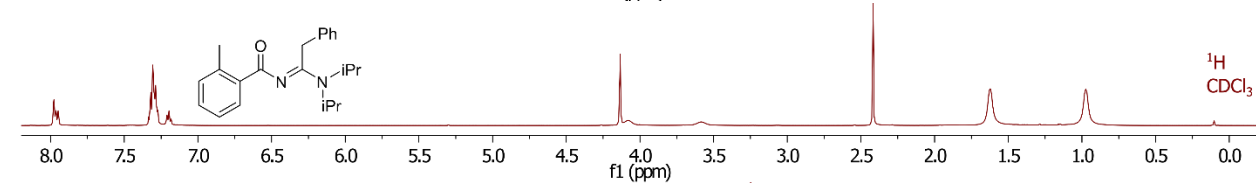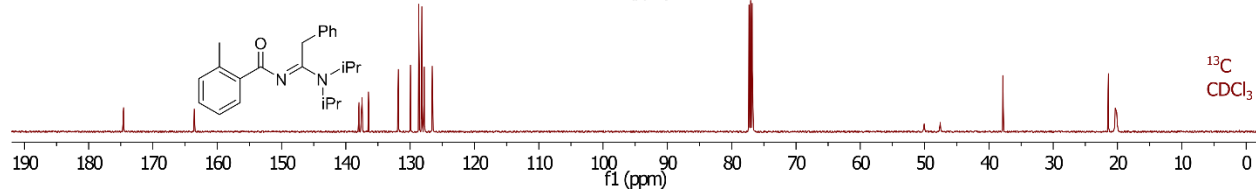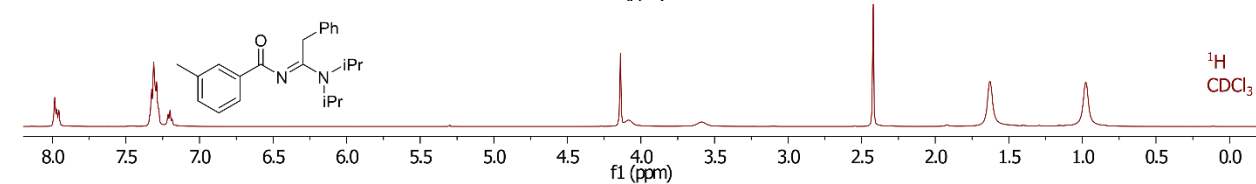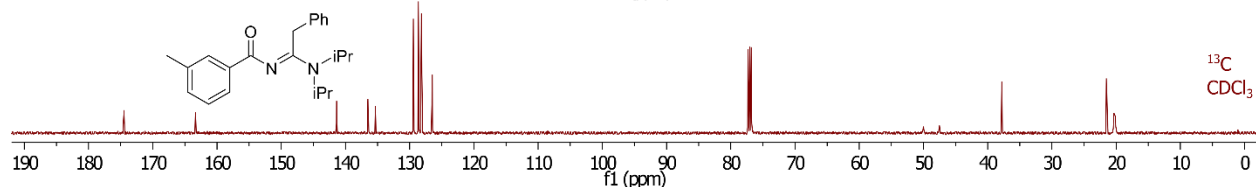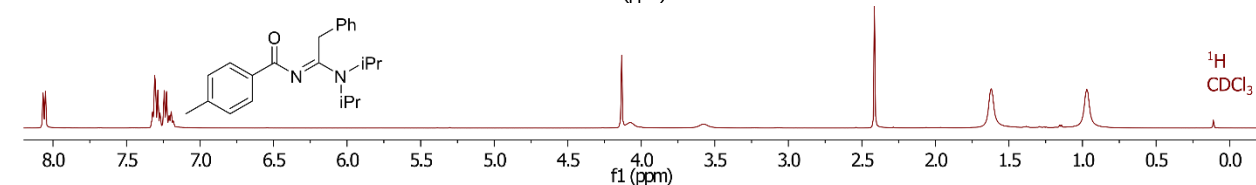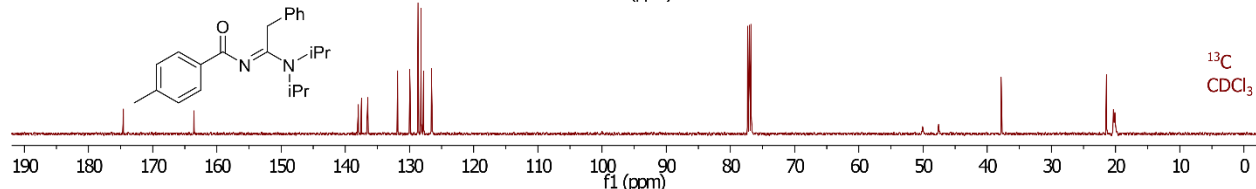

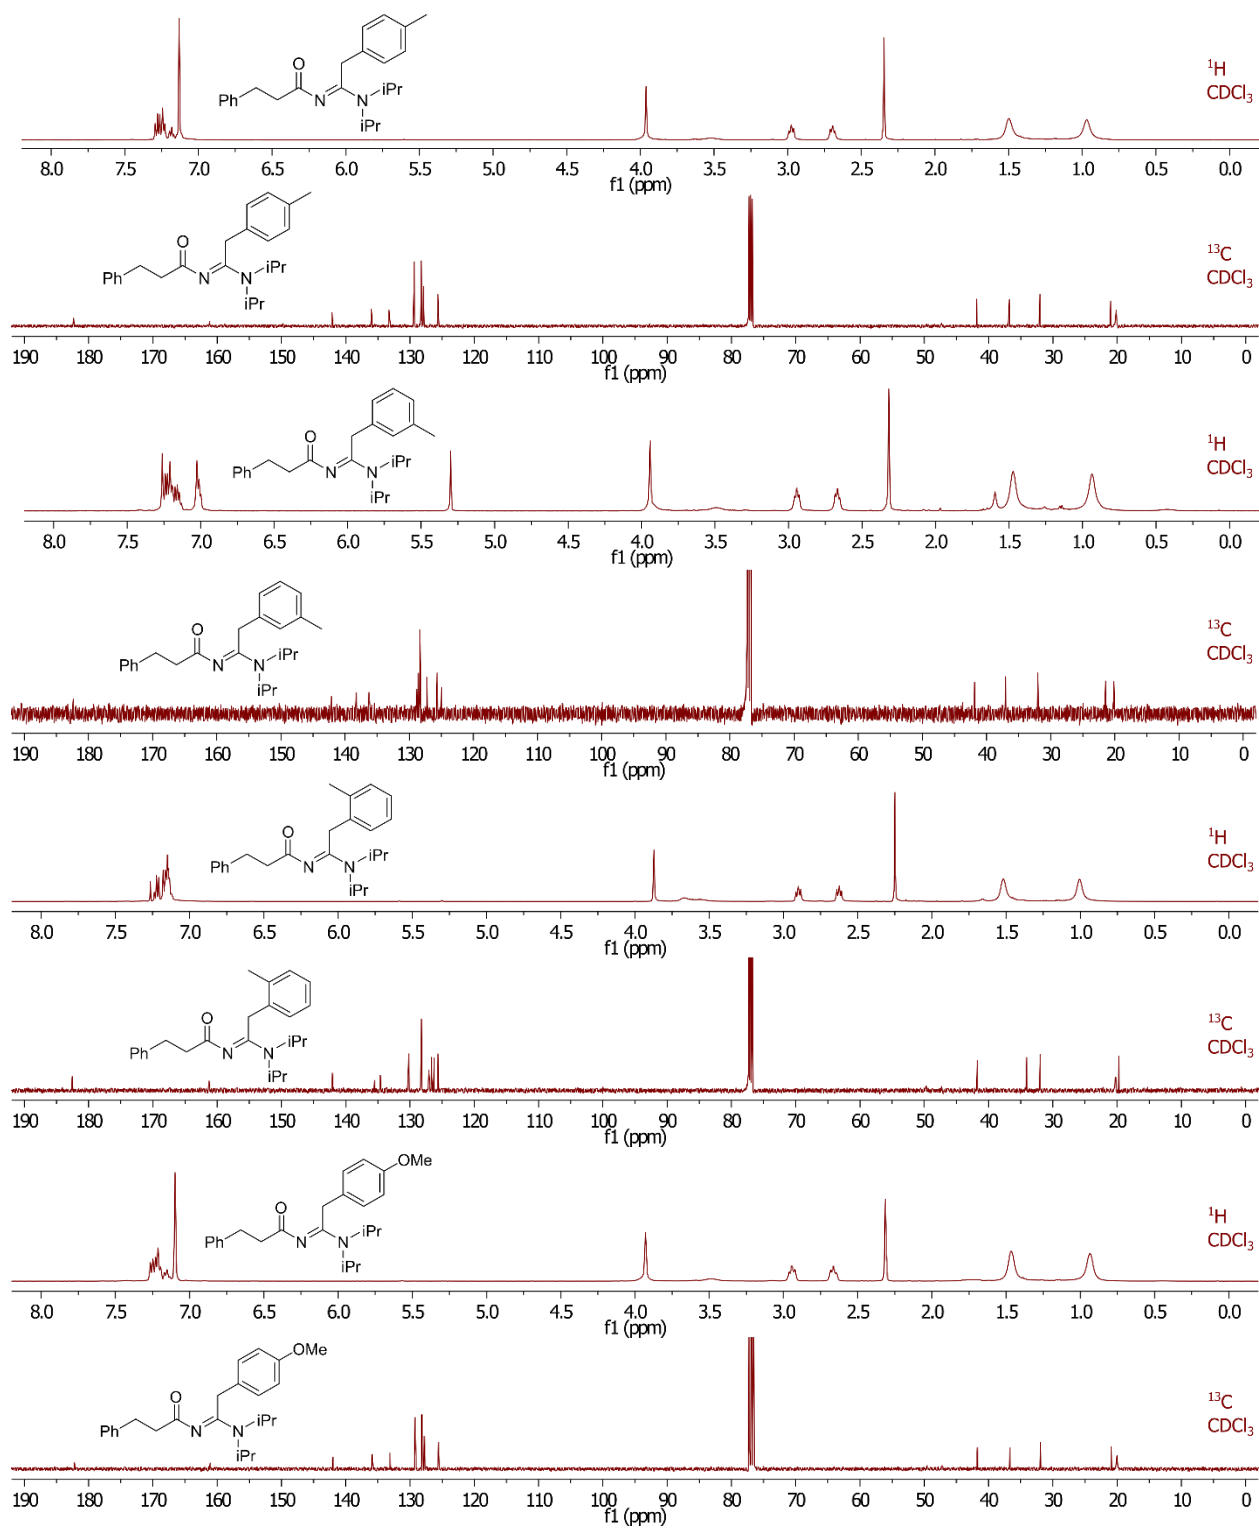

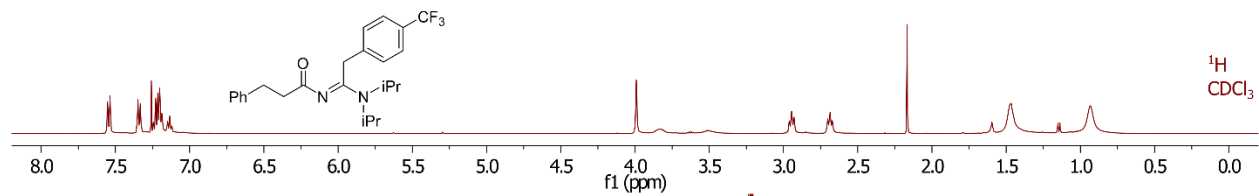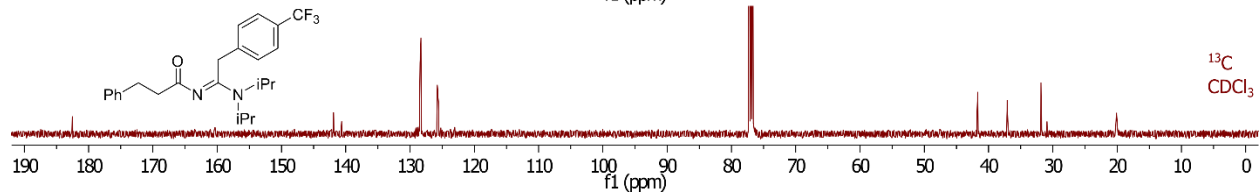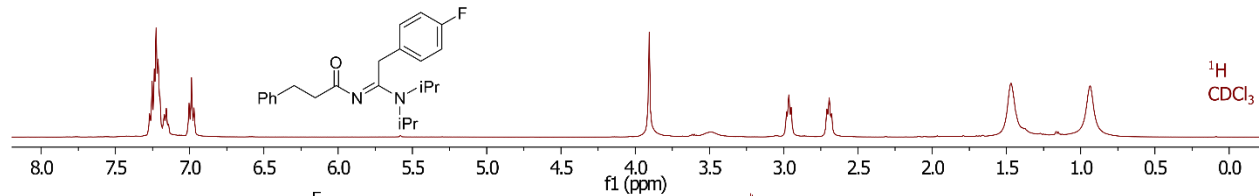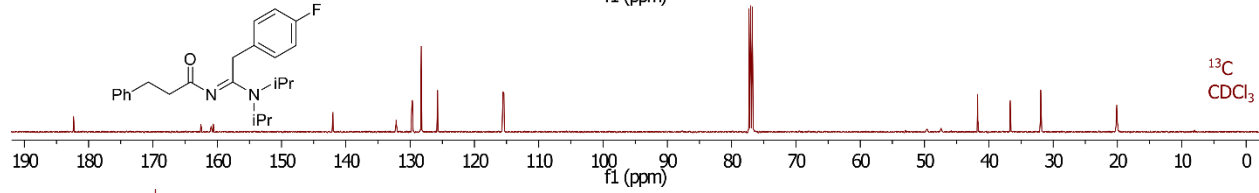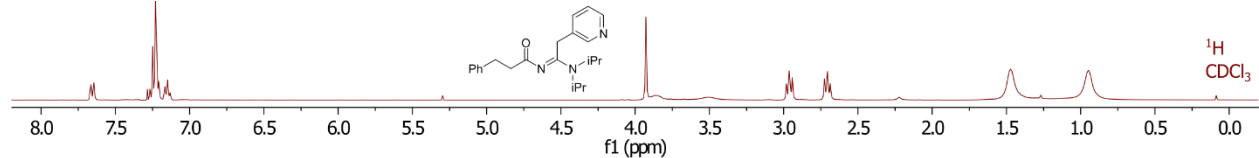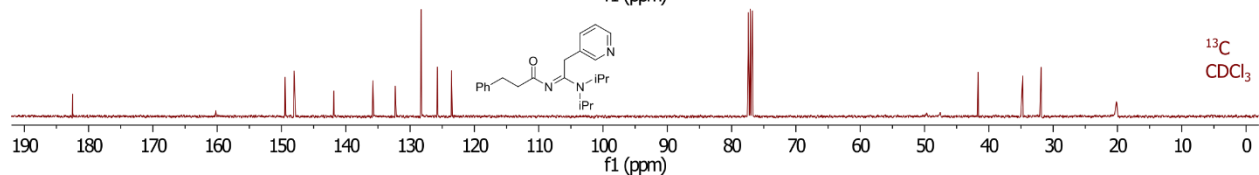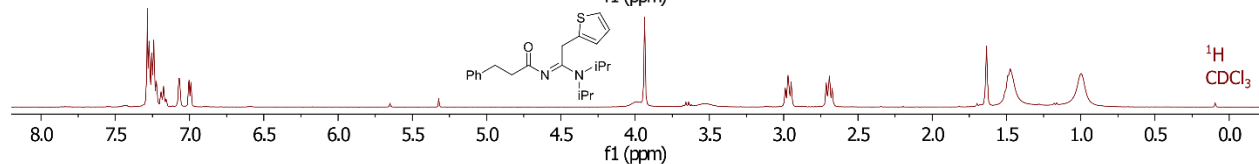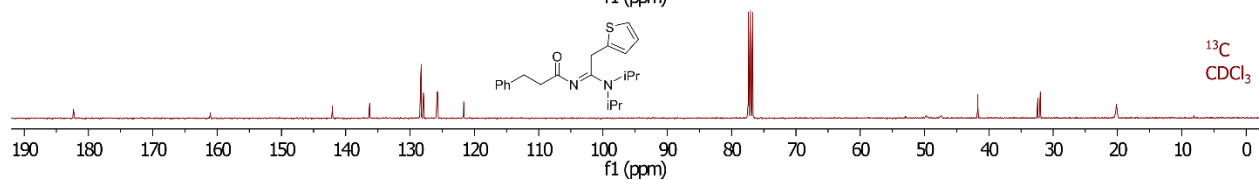

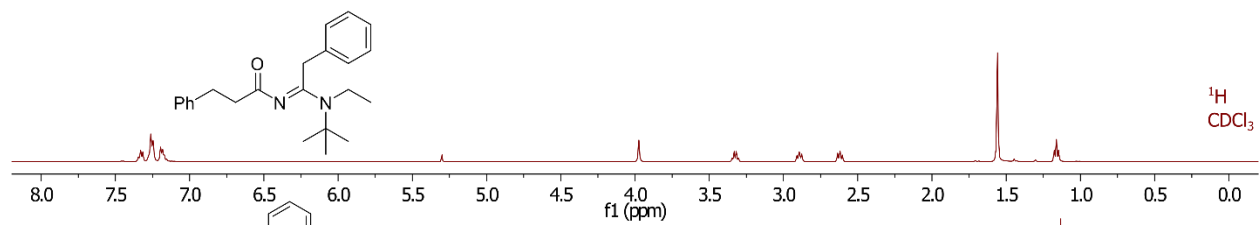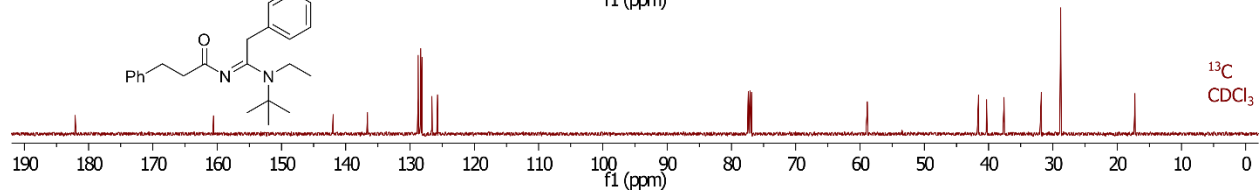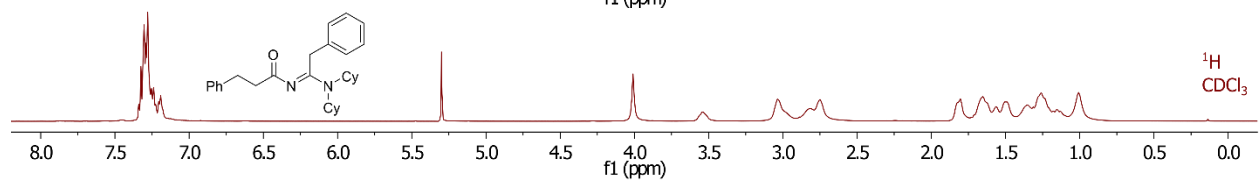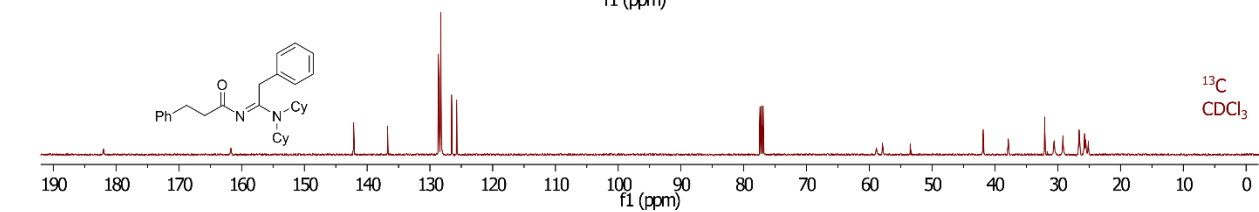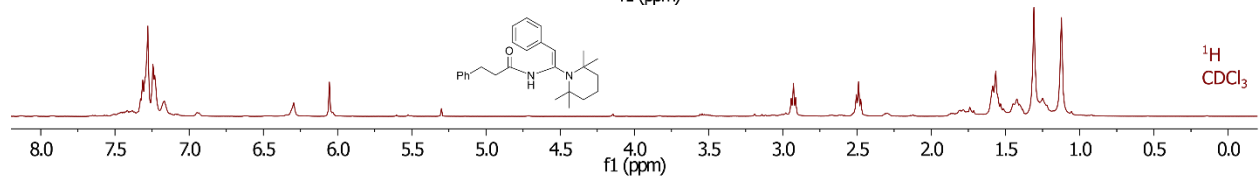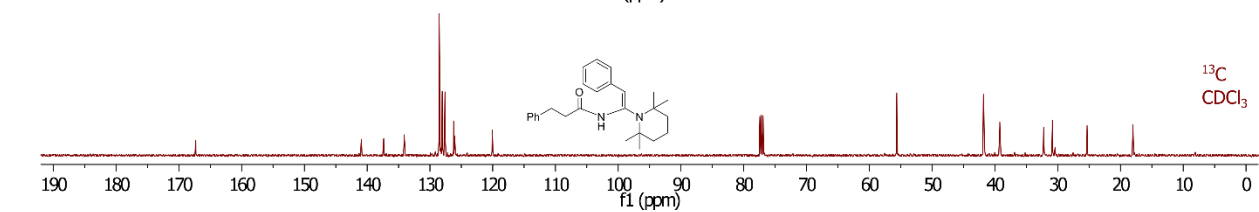

## COMPUTATIONAL SECTION

### General Considerations.

For the computational analysis, we used the Amsterdam Density Functional 2018 program<sup>18</sup>, based on Kohn-Sham density functional theory.<sup>19</sup> We optimized the geometries at the BLYP-D3(BJ)/TZ2P level in the gas phase.<sup>20</sup> An analytical frequency analysis was performed on the same level for all species to obtain the internal energy (U) and the entropy energy ( $\Delta S$ ).<sup>21</sup> More accurate bonding energies were obtained by a self-consistent field procedure at the B3LYP-D3/TZ2P level.<sup>22</sup> The Conductor like Screening Model (COSMO) was used to find solvation corrections for the optimized structures.<sup>23</sup> The zeroth order regular approximation (ZORA) was used to correct for relativistic effects.<sup>24</sup> To correct for the standard state concentrations, adjustments for 1 atm. (1/24.5 M) to 1 M concentration change of 1.9 kcal/mol ( $RT\ln\{24.5\}$ ) was used for reaction steps involving a change in the number of species.<sup>25</sup>

### Energies.

| <i>Species</i>        | <i>U</i><br>(kcal/mol) | <i>pV/n = RT</i><br>(kcal/mol) | <i>-TΔS</i><br>(kcal/mol) | <i>Bonding energy</i><br>(kcal/mol) | <i>ΔH</i><br>(kcal/mol) | <i>ΔG<sup>GP</sup></i><br>(kcal/mol) | <i>ΔG<sup>LP</sup></i><br>(kcal/mol) |
|-----------------------|------------------------|--------------------------------|---------------------------|-------------------------------------|-------------------------|--------------------------------------|--------------------------------------|
| <b>A</b>              | 385.31                 | 0.59                           | -72.83                    | -13026.18                           | -12640.28               | -12713.11                            | -12707.11                            |
| <b>B</b>              | 415.40                 | 0.59                           | -72.04                    | -14142.72                           | -13726.73               | -15052.17                            | -15046.17                            |
| <b>C</b>              | 460.24                 | 0.59                           | -81.15                    | -15940.02                           | -15479.19               | -13798.77                            | -13796.87                            |
| <b>TS1</b>            | 459.69                 | 0.59                           | -82.22                    | -15918.96                           | -15458.68               | -15560.34                            | -15558.44                            |
| <b>D</b>              | 450.57                 | 0.59                           | -81.13                    | -15285.87                           | -14834.71               | -15540.9                             | -15539                               |
| <b>TS2-1</b>          | 450.19                 | 0.59                           | -81.94                    | -15278.59                           | -14827.81               | -14915.84                            | -14913.94                            |
| <b>TS2-2</b>          | 450.48                 | 0.59                           | -80.81                    | -15279.41                           | -14828.34               | -14909.75                            | -14907.85                            |
| <b>TS2-Curtius</b>    | 448.24                 | 0.59                           | -80.62                    | -15275.32                           | -14826.49               | -14907.11                            | -14905.21                            |
| <b>E</b>              | 451.00                 | 0.59                           | -79.43                    | -15349.53                           | -14897.94               | -14977.37                            | -14975.47                            |
| <b>TS3</b>            | 451.54                 | 0.59                           | -80.90                    | -15343.7                            | -14891.57               | -14972.47                            | -14970.57                            |
| <b>F</b>              | 450.95                 | 0.59                           | -76.98                    | -15349.46                           | -14897.92               | -14974.9                             | -14973                               |
| <b>2a</b>             | 70.71                  | 0.59                           | -23.50                    | -2391.96                            | -2320.66                | -2344.16                             | -2342.26                             |
| <b>Dioxazolone</b>    | 43.45                  | 0.59                           | -23.08                    | -1785.73                            | -1741.69                | -1764.77                             | -1762.87                             |
| <b>CO2</b>            | 8.66                   | 0.59                           | -15.26                    | -648.53                             | -639.28                 | -654.54                              | -652.64                              |
| <b>3a</b>             | 130.75                 | 0.59                           | -28.11                    | -3083.2                             | -2951.86                | -2979.97                             | -2978.07                             |
| <b>[iPr2NH][HOAc]</b> | 173.09                 | 0.59                           | -39.06                    | -4364.22                            | -4190.54                | -4229.6                              | -4227.7                              |

## Energy Comparison Between Nitrene Insertion and Curtius Rearrangement.

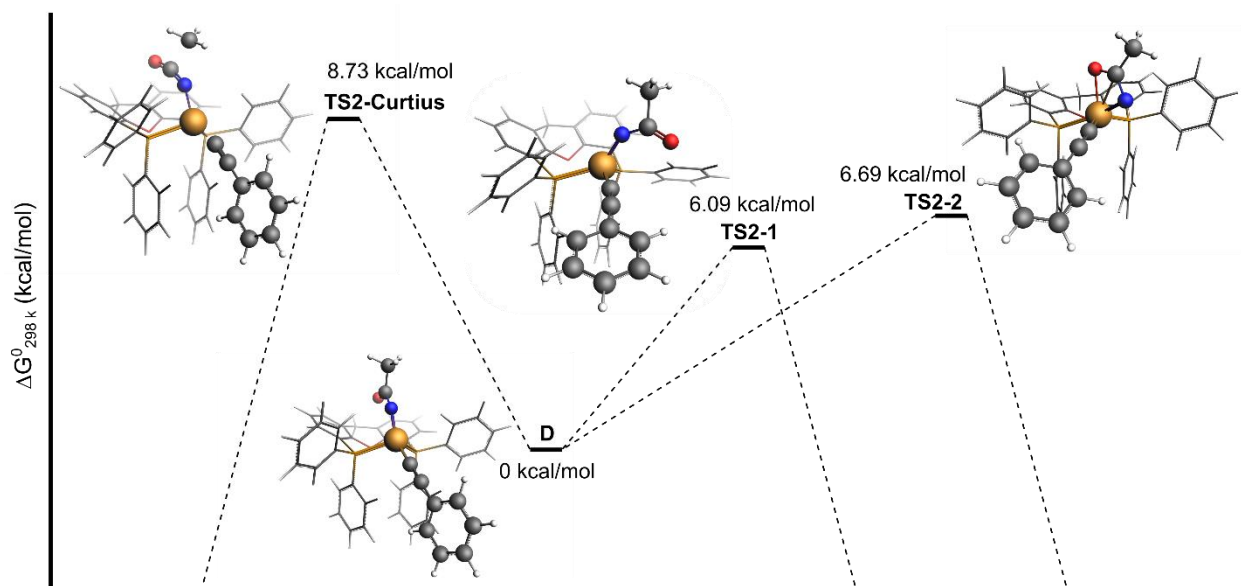

DFT (B3LYP-D3; TZ2P)

We also computed the transition state of the hypothetical Curtius rearrangement from intermediate **D** in order to compare the barrier of that process with the barriers for acyl nitrene insertion into the Cu–C bond of intermediate **D**. The results are shown in the figure above, revealing that the undesired Curtius rearrangement has an approximately 2-3 kcal/mol higher energy barrier than the desired acyl nitrene insertion via either **TS2-1** or **TS2-2**. The DFT results are thus in line with the experimental observations (absence of products derived from undesired Curtius rearrangements).

## Coordinates.

A

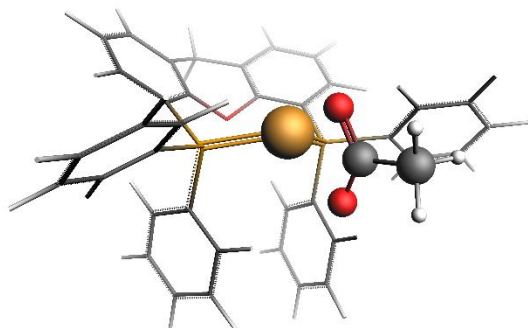

| Atom  | X         | Y         | Z (Angstrom) |
|-------|-----------|-----------|--------------|
| 1.O   | 0.012766  | 0.719021  | 0.376133     |
| 2.C   | 0.312556  | 3.476281  | 0.057560     |
| 3.C   | -1.060976 | 2.836117  | -0.053049    |
| 4.C   | -1.144152 | 1.449880  | 0.105128     |
| 5.C   | 3.208219  | 0.595569  | -1.399060    |
| 6.C   | 3.450287  | 1.959622  | -1.595371    |
| 7.C   | 2.535315  | 2.917636  | -1.144099    |
| 8.C   | 1.372930  | 2.524602  | -0.470324    |
| 9.C   | 1.164771  | 1.157233  | -0.278220    |
| 10.C  | 2.045333  | 0.167509  | -0.740188    |
| 11.C  | -2.242857 | 3.534044  | -0.321137    |
| 12.C  | -2.338405 | 0.725216  | -0.029946    |
| 13.H  | 3.910603  | -0.141867 | -1.775619    |
| 14.H  | 4.352112  | 2.275725  | -2.113948    |
| 15.H  | 2.722703  | 3.975962  | -1.315242    |
| 16.C  | -3.460941 | 2.851151  | -0.418310    |
| 17.C  | -3.508756 | 1.460485  | -0.281814    |
| 18.H  | -4.375921 | 3.402540  | -0.620529    |
| 19.H  | -4.452680 | 0.938250  | -0.400169    |
| 20.H  | -1.678523 | 0.262231  | 2.530080     |
| 21.H  | -2.208113 | 4.613584  | -0.455494    |
| 22.P  | -2.237895 | -1.115788 | -0.093675    |
| 23.P  | 1.504164  | -1.583809 | -0.583652    |
| 24.H  | 4.317826  | -2.258737 | 0.214182     |
| 25.H  | 0.524368  | 3.704113  | 1.115518     |
| 26.H  | 2.840925  | -0.195867 | 1.735051     |
| 27.H  | 0.340670  | 4.428462  | -0.483314    |
| 28.H  | -3.298863 | -2.059220 | -2.594489    |
| 29.Cu | -0.554338 | -2.010704 | -1.241493    |
| 30.O  | -1.032601 | -3.194635 | -2.857803    |
| 31.C  | -1.309024 | -4.266822 | -2.192130    |
| 32.C  | -1.846750 | -5.457712 | -2.977991    |
| 33.H  | -1.444897 | -5.468031 | -3.995308    |
| 34.H  | -1.617028 | -6.394026 | -2.461847    |
| 35.H  | -2.938990 | -5.362840 | -3.045138    |
| 36.O  | -1.184491 | -4.339970 | -0.936049    |
| 37.C  | 1.693779  | -1.949547 | 1.205921     |
| 38.C  | 1.096744  | -3.129922 | 1.681050     |
| 39.C  | 1.211520  | -3.474130 | 3.028045     |
| 40.C  | 1.905360  | -2.641890 | 3.912989     |
| 41.C  | 2.488883  | -1.460624 | 3.445564     |
| 42.C  | 2.386958  | -1.115515 | 2.094411     |

|      |           |           |           |
|------|-----------|-----------|-----------|
| 43.H | 0.530309  | -3.761074 | 0.999406  |
| 44.H | 0.738893  | -4.382585 | 3.390904  |
| 45.H | 1.980814  | -2.907840 | 4.965029  |
| 46.H | 3.023148  | -0.806124 | 4.131137  |
| 47.C | 2.860745  | -2.549244 | -1.357302 |
| 48.C | 2.591408  | -3.173975 | -2.585408 |
| 49.C | 3.576932  | -3.947128 | -3.207292 |
| 50.C | 4.828248  | -4.106762 | -2.603646 |
| 51.C | 5.095691  | -3.494601 | -1.372757 |
| 52.C | 4.115824  | -2.719282 | -0.749788 |
| 53.H | 1.604326  | -3.072558 | -3.032954 |
| 54.H | 3.361812  | -4.434196 | -4.155791 |
| 55.H | 5.590872  | -4.716527 | -3.083496 |
| 56.H | 6.064457  | -3.628873 | -0.896296 |
| 57.C | -2.140291 | -1.660731 | 1.657212  |
| 58.C | -2.326708 | -3.032106 | 1.912633  |
| 59.C | -2.246525 | -3.515404 | 3.217729  |
| 60.C | -1.948017 | -2.648258 | 4.275375  |
| 61.C | -1.730484 | -1.292311 | 4.019440  |
| 62.C | -1.834089 | -0.796048 | 2.716421  |
| 63.H | -2.508252 | -3.713986 | 1.085577  |
| 64.H | -2.399645 | -4.575609 | 3.407233  |
| 65.H | -1.872966 | -3.030301 | 5.291009  |
| 66.H | -1.484101 | -0.615593 | 4.834515  |
| 67.C | -3.935653 | -1.616106 | -0.579853 |
| 68.C | -5.012840 | -1.616709 | 0.321888  |
| 69.C | -6.284297 | -2.004773 | -0.104195 |
| 70.C | -6.489181 | -2.397215 | -1.432842 |
| 71.C | -5.417409 | -2.407395 | -2.331162 |
| 72.C | -4.141825 | -2.021929 | -1.907830 |
| 73.H | -4.850959 | -1.322916 | 1.355880  |
| 74.H | -7.114467 | -2.004841 | 0.599055  |
| 75.H | -7.479660 | -2.703472 | -1.762181 |
| 76.H | -5.570706 | -2.726106 | -3.359871 |

B

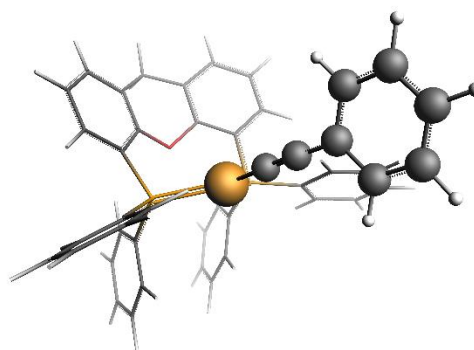

| Atom | X         | Y         | Z (Angstrom) |
|------|-----------|-----------|--------------|
| 1.O  | -0.291245 | 0.336811  | 0.221158     |
| 2.C  | 0.197320  | 2.775633  | -1.044325    |
| 3.C  | -1.218676 | 2.231496  | -0.951327    |
| 4.C  | -1.395881 | 1.003935  | -0.311290    |
| 5.C  | 2.856064  | -0.634730 | -1.367748    |
| 6.C  | 3.202454  | 0.559502  | -2.006828    |



|       |           |           |           |
|-------|-----------|-----------|-----------|
| 7.C   | 2.366850  | 1.679659  | -1.927940 |
| 8.C   | 1.186233  | 1.629138  | -1.179826 |
| 9.C   | 0.880706  | 0.429721  | -0.530909 |
| 10.C  | 1.670810  | -0.725054 | -0.619145 |
| 11.C  | -2.354748 | 2.856656  | -1.478307 |
| 12.C  | -2.634579 | 0.359312  | -0.194792 |
| 13.H  | 3.490180  | -1.508798 | -1.474457 |
| 14.H  | 4.119484  | 0.609619  | -2.588749 |
| 15.H  | 2.629645  | 2.596105  | -2.452972 |
| 16.C  | -3.614961 | 2.260194  | -1.350282 |
| 17.C  | -3.756527 | 1.019050  | -0.719509 |
| 18.H  | -4.490765 | 2.757691  | -1.759354 |
| 19.H  | -4.732743 | 0.548821  | -0.653016 |
| 20.H  | -1.887339 | -3.194791 | 2.547711  |
| 21.H  | -2.251187 | 3.810361  | -1.992278 |
| 22.P  | -2.629587 | -1.355609 | 0.479363  |
| 23.P  | 0.980278  | -2.305588 | 0.041854  |
| 24.H  | 3.741358  | -3.098441 | 0.899768  |
| 25.H  | 0.427769  | 3.349095  | -0.130807 |
| 26.H  | 1.445910  | -0.100914 | 2.037931  |
| 27.H  | 0.291832  | 3.469750  | -1.886435 |
| 28.H  | -5.051570 | -1.008534 | 2.222434  |
| 29.Cu | -1.134969 | -2.616529 | -0.667935 |
| 30.C  | -7.065366 | -2.617472 | -0.007470 |
| 31.C  | -6.680591 | -1.925935 | 1.147200  |
| 32.C  | -5.348299 | -1.543621 | 1.324187  |
| 33.H  | -4.028081 | -2.834302 | -1.548400 |
| 34.H  | -6.404714 | -3.482116 | -1.875111 |
| 35.H  | -8.103047 | -2.915576 | -0.141999 |
| 36.H  | -7.417717 | -1.685868 | 1.910417  |
| 37.C  | 1.283380  | -2.248515 | 1.855371  |
| 38.C  | 1.264872  | -3.464009 | 2.564427  |
| 39.C  | 1.431598  | -3.477205 | 3.949350  |
| 40.C  | 1.596475  | -2.277025 | 4.649165  |
| 41.C  | 1.592196  | -1.065390 | 3.953556  |
| 42.C  | 1.440353  | -1.049201 | 2.564391  |
| 43.H  | 1.136355  | -4.401231 | 2.027771  |
| 44.H  | 1.429069  | -4.425193 | 4.482936  |
| 45.H  | 1.719530  | -2.286827 | 5.729574  |
| 46.H  | 1.707935  | -0.127120 | 4.491087  |
| 47.C  | 2.188794  | -3.565986 | -0.533062 |
| 48.C  | 1.818043  | -4.384925 | -1.611928 |
| 49.C  | 2.710752  | -5.346038 | -2.097298 |
| 50.C  | 3.969373  | -5.499040 | -1.508263 |
| 51.C  | 4.340358  | -4.686606 | -0.428671 |
| 52.C  | 3.455063  | -3.723239 | 0.057533  |
| 53.H  | 0.829571  | -4.275603 | -2.054913 |
| 54.H  | 2.415088  | -5.979892 | -2.930280 |
| 55.H  | 4.659054  | -6.252029 | -1.883482 |
| 56.H  | 5.317723  | -4.806249 | 0.033893  |
| 57.C  | -2.376100 | -1.108411 | 2.280879  |
| 58.C  | -2.505854 | 0.135262  | 2.915918  |
| 59.C  | -2.289782 | 0.247559  | 4.292582  |
| 60.C  | -1.951410 | -0.880547 | 5.045076  |
| 61.C  | -1.818319 | -2.122988 | 4.415781  |
| 62.C  | -2.019523 | -2.234425 | 3.040702  |
| 63.H  | -2.773309 | 1.014230  | 2.335651  |
| 64.H  | -2.388970 | 1.216749  | 4.776687  |

|      |           |           |           |
|------|-----------|-----------|-----------|
| 65.H | -1.780933 | -0.791094 | 6.115414  |
| 66.H | -1.534678 | -2.999369 | 4.991989  |
| 67.C | -4.391859 | -1.854452 | 0.344315  |
| 68.C | -4.777285 | -2.562210 | -0.807383 |
| 69.C | -6.113133 | -2.933918 | -0.982005 |
| 70.C | -2.065953 | -4.330601 | -3.091127 |
| 71.C | -2.559246 | -5.109705 | -4.172314 |
| 72.C | -3.054705 | -6.419562 | -3.959158 |
| 73.C | -3.546574 | -7.179889 | -5.019575 |
| 74.C | -3.561906 | -6.660805 | -6.319962 |
| 75.C | -3.074974 | -5.367359 | -6.547793 |
| 76.C | -2.580470 | -4.600224 | -5.493368 |
| 77.C | -1.661267 | -3.654844 | -2.143117 |
| 78.H | -3.045331 | -6.822348 | -2.949642 |
| 79.H | -3.922118 | -8.184047 | -4.830874 |
| 80.H | -3.947272 | -7.255936 | -7.144751 |
| 81.H | -3.081722 | -4.954380 | -7.554729 |
| 82.H | -2.203914 | -3.596094 | -5.671734 |

C

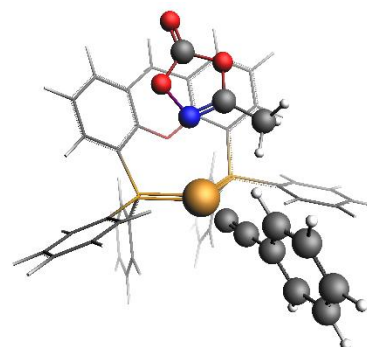

| Atom | X         | Y         | Z (Angstrom) |
|------|-----------|-----------|--------------|
| 1.O  | -0.801728 | 0.740034  | -0.390813    |
| 2.C  | -0.792150 | 2.906632  | -2.158450    |
| 3.C  | -1.902197 | 1.870802  | -2.217753    |
| 4.C  | -1.851248 | 0.815855  | -1.303877    |
| 5.C  | 2.802497  | 0.777511  | -1.019129    |
| 6.C  | 2.908262  | 1.894251  | -1.852430    |
| 7.C  | 1.769480  | 2.611554  | -2.231688    |
| 8.C  | 0.511755  | 2.244511  | -1.744796    |
| 9.C  | 0.443262  | 1.148302  | -0.882392    |
| 10.C | 1.552170  | 0.370049  | -0.524571    |
| 11.C | -2.962678 | 1.885997  | -3.131884    |
| 12.C | -2.797261 | -0.219791 | -1.258287    |
| 13.H | 3.687647  | 0.196890  | -0.782075    |
| 14.H | 3.882586  | 2.184458  | -2.237580    |
| 15.H | 1.851151  | 3.442980  | -2.928072    |
| 16.C | -3.937430 | 0.882611  | -3.102565    |
| 17.C | -3.860225 | -0.161917 | -2.174251    |
| 18.H | -4.756313 | 0.905697  | -3.817209    |
| 19.H | -4.614733 | -0.942914 | -2.168914    |
| 20.H | -1.812177 | -2.637972 | 2.480084     |
| 21.H | -3.015445 | 2.678777  | -3.874447    |
| 22.P | -2.441374 | -1.617062 | -0.116078    |
| 23.P | 1.263800  | -1.236693 | 0.339304     |

|       |           |           |           |
|-------|-----------|-----------|-----------|
| 24.H  | 3.827527  | -0.827723 | 1.842296  |
| 25.H  | -1.063053 | 3.684507  | -1.425708 |
| 26.H  | 0.584278  | 1.285203  | 1.833183  |
| 27.H  | -0.675180 | 3.398482  | -3.128795 |
| 28.H  | -5.344783 | -1.389515 | 0.576854  |
| 29.Cu | -0.412548 | -2.562963 | -0.402272 |
| 30.C  | -6.056493 | -4.476164 | -0.681481 |
| 31.C  | -6.260441 | -3.225616 | -0.082776 |
| 32.C  | -5.185904 | -2.353553 | 0.099812  |
| 33.H  | -2.687780 | -4.290481 | -1.183954 |
| 34.H  | -4.606017 | -5.831217 | -1.535357 |
| 35.H  | -6.895061 | -5.155387 | -0.819201 |
| 36.H  | -7.255821 | -2.934539 | 0.245774  |
| 37.C  | 1.070047  | -0.800856 | 2.114387  |
| 38.C  | 1.217283  | -1.832261 | 3.059923  |
| 39.C  | 1.040694  | -1.573059 | 4.418958  |
| 40.C  | 0.692834  | -0.288239 | 4.849861  |
| 41.C  | 0.521287  | 0.733464  | 3.912591  |
| 42.C  | 0.711577  | 0.481300  | 2.551195  |
| 43.H  | 1.484144  | -2.833535 | 2.729208  |
| 44.H  | 1.171299  | -2.375417 | 5.141902  |
| 45.H  | 0.549578  | -0.087739 | 5.909042  |
| 46.H  | 0.239603  | 1.731818  | 4.239231  |
| 47.C  | 2.919757  | -2.030187 | 0.289859  |
| 48.C  | 3.116462  | -3.070782 | -0.631043 |
| 49.C  | 4.367302  | -3.687547 | -0.730914 |
| 50.C  | 5.421667  | -3.277514 | 0.090572  |
| 51.C  | 5.225740  | -2.246379 | 1.018138  |
| 52.C  | 3.980082  | -1.624254 | 1.118517  |
| 53.H  | 2.284644  | -3.408202 | -1.244805 |
| 54.H  | 4.511318  | -4.497339 | -1.442489 |
| 55.H  | 6.391930  | -3.763540 | 0.015844  |
| 56.H  | 6.042551  | -1.929778 | 1.663288  |
| 57.C  | -2.710548 | -0.903956 | 1.555029  |
| 58.C  | -3.297693 | 0.348503  | 1.779933  |
| 59.C  | -3.474709 | 0.816908  | 3.085812  |
| 60.C  | -3.071325 | 0.036300  | 4.172667  |
| 61.C  | -2.480582 | -1.212517 | 3.952181  |
| 62.C  | -2.292895 | -1.677288 | 2.650957  |
| 63.H  | -3.613839 | 0.958982  | 0.938435  |
| 64.H  | -3.928450 | 1.791755  | 3.252239  |
| 65.H  | -3.205868 | 0.403197  | 5.187638  |
| 66.H  | -2.146207 | -1.814345 | 4.792686  |
| 67.C  | -3.897023 | -2.723962 | -0.320969 |
| 68.C  | -3.693370 | -3.984600 | -0.904241 |
| 69.C  | -4.773665 | -4.854526 | -1.086690 |
| 70.C  | -0.085557 | -5.437660 | -1.557165 |
| 71.C  | 0.013766  | -6.714936 | -2.172719 |
| 72.C  | 0.502094  | -6.847348 | -3.495674 |
| 73.C  | 0.585259  | -8.098190 | -4.106414 |
| 74.C  | 0.189665  | -9.252326 | -3.418633 |
| 75.C  | -0.291489 | -9.138982 | -2.108279 |
| 76.C  | -0.380865 | -7.891682 | -1.491186 |
| 77.C  | -0.185628 | -4.319904 | -1.047157 |

|      |           |            |           |
|------|-----------|------------|-----------|
| 78.H | 0.815411  | -5.952938  | -4.028697 |
| 79.H | 0.963768  | -8.174962  | -5.124051 |
| 80.H | 0.257675  | -10.226840 | -3.896203 |
| 81.H | -0.599025 | -10.029998 | -1.563978 |
| 82.H | -0.754954 | -7.805308  | -0.474139 |
| 83.O | 0.855385  | -0.225858  | -3.747519 |
| 84.C | -0.081102 | 0.350713   | -4.558869 |
| 85.O | -1.140841 | -0.565534  | -4.669896 |
| 86.C | -0.786655 | -1.646084  | -3.892124 |
| 87.N | 0.361505  | -1.535101  | -3.310561 |
| 88.O | -0.028535 | 1.426323   | -5.084334 |
| 89.C | -1.706029 | -2.804293  | -3.808250 |
| 90.H | -1.865737 | -3.222899  | -4.809197 |
| 91.H | -2.674341 | -2.479329  | -3.413269 |
| 92.H | -1.271775 | -3.558865  | -3.146132 |

### TS1

Imaginary frequency: -32.86 cm<sup>-1</sup>

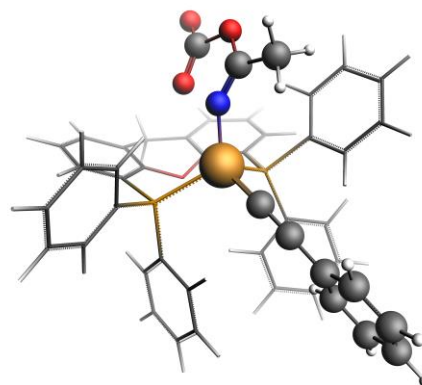

| Atom | X         | Y         | Z (Angstrom) |
|------|-----------|-----------|--------------|
| 1.O  | -0.118457 | 0.455560  | 0.167120     |
| 2.C  | -0.137002 | 3.297493  | 0.248080     |
| 3.C  | -1.422389 | 2.495277  | 0.151283     |
| 4.C  | -1.347589 | 1.101915  | 0.071384     |
| 5.C  | 3.212250  | 0.967729  | -1.231341    |
| 6.C  | 3.279248  | 2.364069  | -1.260930    |
| 7.C  | 2.203863  | 3.134163  | -0.806612    |
| 8.C  | 1.047598  | 2.525530  | -0.303570    |
| 9.C  | 1.003915  | 1.130937  | -0.297606    |
| 10.C | 2.061048  | 0.326359  | -0.751003    |
| 11.C | -2.693342 | 3.077916  | 0.144329     |
| 12.C | -2.475218 | 0.283287  | -0.095113    |
| 13.H | 4.041741  | 0.373481  | -1.602044    |
| 14.H | 4.169452  | 2.853046  | -1.648066    |
| 15.H | 2.260378  | 4.220530  | -0.841439    |
| 16.C | -3.844204 | 2.284169  | 0.084607     |
| 17.C | -3.736455 | 0.897465  | -0.038194    |
| 18.H | -4.825952 | 2.749992  | 0.110802     |
| 19.H | -4.632743 | 0.290439  | -0.123005    |
| 20.H | -0.460129 | -1.974998 | 1.752275     |
| 21.H | -2.782133 | 4.161382  | 0.197341     |
| 22.P | -2.173699 | -1.494705 | -0.487394    |
| 23.P | 1.776154  | -1.485073 | -0.830642    |
| 24.H | 4.534284  | -2.325435 | -0.028348    |

|       |           |           |           |
|-------|-----------|-----------|-----------|
| 25.H  | 0.057156  | 3.549379  | 1.304110  |
| 26.H  | 2.423083  | -0.193695 | 1.799785  |
| 27.H  | -0.248825 | 4.250488  | -0.282453 |
| 28.H  | -3.328086 | -4.082976 | -1.083505 |
| 29.CU | -0.207542 | -2.099682 | -1.828875 |
| 30.C  | -5.387417 | -2.896233 | -3.521975 |
| 31.C  | -4.755620 | -3.807779 | -2.667270 |
| 32.C  | -3.839168 | -3.363019 | -1.714506 |
| 33.H  | -3.915633 | -0.028745 | -2.436031 |
| 34.H  | -5.542013 | -0.820001 | -4.104185 |
| 35.H  | -6.104332 | -3.245478 | -4.261467 |
| 36.H  | -4.970168 | -4.871001 | -2.746562 |
| 37.C  | 2.004747  | -2.101988 | 0.875921  |
| 38.C  | 1.816711  | -3.479687 | 1.094264  |
| 39.C  | 1.917162  | -4.002376 | 2.383033  |
| 40.C  | 2.192487  | -3.157977 | 3.465797  |
| 41.C  | 2.371723  | -1.787743 | 3.253009  |
| 42.C  | 2.282257  | -1.258591 | 1.961438  |
| 43.H  | 1.555347  | -4.126853 | 0.261985  |
| 44.H  | 1.758035  | -5.065909 | 2.543159  |
| 45.H  | 2.261088  | -3.565907 | 4.471799  |
| 46.H  | 2.582072  | -1.127913 | 4.091715  |
| 47.C  | 3.232846  | -2.118803 | -1.740259 |
| 48.C  | 3.114127  | -2.281155 | -3.129850 |
| 49.C  | 4.198784  | -2.745048 | -3.877072 |
| 50.C  | 5.404197  | -3.060575 | -3.240773 |
| 51.C  | 5.523763  | -2.908499 | -1.855230 |
| 52.C  | 4.442784  | -2.437852 | -1.105361 |
| 53.H  | 2.169115  | -2.052168 | -3.617195 |
| 54.H  | 4.100054  | -2.870746 | -4.952840 |
| 55.H  | 6.245776  | -3.431062 | -3.821930 |
| 56.H  | 6.458298  | -3.158289 | -1.357772 |
| 57.C  | -2.497114 | -2.320395 | 1.123993  |
| 58.C  | -3.740019 | -2.858446 | 1.491410  |
| 59.C  | -3.902811 | -3.460405 | 2.741986  |
| 60.C  | -2.833163 | -3.517573 | 3.641562  |
| 61.C  | -1.596750 | -2.969081 | 3.285646  |
| 62.C  | -1.426255 | -2.380748 | 2.030779  |
| 63.H  | -4.576868 | -2.818712 | 0.800895  |
| 64.H  | -4.866843 | -3.885700 | 3.012604  |
| 65.H  | -2.962513 | -3.989951 | 4.612665  |
| 66.H  | -0.756044 | -3.013372 | 3.972428  |
| 67.C  | -3.549369 | -1.988883 | -1.589636 |
| 68.C  | -4.159717 | -1.084888 | -2.476772 |
| 69.C  | -5.077822 | -1.535686 | -3.429369 |
| 70.C  | -0.674895 | -5.028097 | -1.000504 |
| 71.C  | -1.064305 | -6.205181 | -0.303705 |
| 72.C  | -1.004658 | -7.487875 | -0.895145 |
| 73.C  | -1.407427 | -8.618225 | -0.182804 |
| 74.C  | -1.878581 | -8.499933 | 1.130633  |
| 75.C  | -1.942653 | -7.235044 | 1.728794  |
| 76.C  | -1.541170 | -6.100322 | 1.025769  |
| 77.C  | -0.389525 | -3.947554 | -1.507665 |
| 78.H  | -0.640367 | -7.579377 | -1.915302 |
| 79.H  | -1.354766 | -9.597553 | -0.654034 |
| 80.H  | -2.192667 | -9.383953 | 1.681082  |
| 81.H  | -2.309330 | -7.130655 | 2.748245  |
| 82.H  | -1.589700 | -5.120441 | 1.488192  |

|      |           |           |           |
|------|-----------|-----------|-----------|
| 83.O | -0.533953 | 0.777441  | -3.134451 |
| 84.C | -1.320592 | 1.221363  | -4.043435 |
| 85.O | -1.865406 | 0.068955  | -4.859622 |
| 86.C | -1.439515 | -1.097770 | -4.362198 |
| 87.N | -0.657011 | -1.187034 | -3.349330 |
| 88.O | -1.689463 | 2.329406  | -4.349982 |
| 89.C | -1.923626 | -2.343244 | -5.058390 |
| 90.H | -1.468601 | -3.224988 | -4.605219 |
| 91.H | -1.673213 | -2.281651 | -6.123216 |
| 92.H | -3.012057 | -2.398883 | -4.951385 |

D

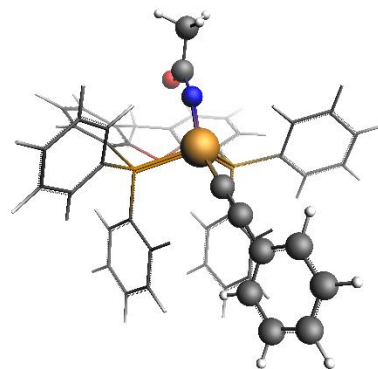

| Atom  | X         | Y         | Z (Angstrom) |
|-------|-----------|-----------|--------------|
| 1.O   | -0.502795 | 0.160069  | -0.167453    |
| 2.C   | -0.798581 | 2.891768  | 0.451938     |
| 3.C   | -1.982452 | 2.063804  | -0.015609    |
| 4.C   | -1.767496 | 0.721253  | -0.327879    |
| 5.C   | 2.823889  | 1.211834  | -1.246616    |
| 6.C   | 2.766716  | 2.582824  | -0.980446    |
| 7.C   | 1.608217  | 3.153046  | -0.437710    |
| 8.C   | 0.496633  | 2.361935  | -0.135345    |
| 9.C   | 0.578975  | 1.000049  | -0.420825    |
| 10.C  | 1.715935  | 0.396729  | -0.970826    |
| 11.C  | -3.268278 | 2.574927  | -0.204813    |
| 12.C  | -2.767677 | -0.119802 | -0.830136    |
| 13.H  | 3.716965  | 0.774198  | -1.681794    |
| 14.H  | 3.624413  | 3.211644  | -1.205864    |
| 15.H  | 1.565766  | 4.224595  | -0.252033    |
| 16.C  | -4.301484 | 1.755462  | -0.675674    |
| 17.C  | -4.053762 | 0.419592  | -0.996829    |
| 18.H  | -5.298463 | 2.166213  | -0.814405    |
| 19.H  | -4.848689 | -0.198498 | -1.401184    |
| 20.H  | -1.772068 | -1.260198 | 1.454470     |
| 21.H  | -3.460884 | 3.624824  | 0.007241     |
| 22.P  | -2.280982 | -1.780396 | -1.429693    |
| 23.P  | 1.588304  | -1.375529 | -1.394816    |
| 24.H  | 2.350849  | -1.230271 | -4.152615    |
| 25.H  | -0.738322 | 2.856029  | 1.552981     |
| 26.H  | 2.061334  | -0.476023 | 1.415068     |
| 27.H  | -0.940060 | 3.943439  | 0.178704     |
| 28.H  | -4.872841 | -3.071983 | -0.680131    |
| 29.Cu | -0.324594 | -1.886621 | -2.688425    |
| 30.C  | -5.925943 | -3.159147 | -3.919998    |
| 31.C  | -5.948674 | -3.332103 | -2.531292    |
| 32.C  | -4.855875 | -2.934472 | -1.757636    |
| 33.H  | -2.830676 | -1.761121 | -4.240053    |

|      |           |            |           |
|------|-----------|------------|-----------|
| 34.H | -4.783315 | -2.460223  | -5.615070 |
| 35.H | -6.777191 | -3.472588  | -4.520399 |
| 36.H | -6.816962 | -3.776778  | -2.050260 |
| 37.C | 1.674673  | -2.237569  | 0.223016  |
| 38.C | 1.485263  | -3.629695  | 0.247607  |
| 39.C | 1.550514  | -4.321853  | 1.456545  |
| 40.C | 1.791269  | -3.636852  | 2.651531  |
| 41.C | 1.970187  | -2.251106  | 2.632822  |
| 42.C | 1.914332  | -1.551728  | 1.423708  |
| 43.H | 1.265456  | -4.154772  | -0.676532 |
| 44.H | 1.398218  | -5.398226  | 1.468930  |
| 45.H | 1.830557  | -4.179512  | 3.593307  |
| 46.H | 2.156299  | -1.711170  | 3.558826  |
| 47.C | 3.169251  | -1.757586  | -2.225445 |
| 48.C | 4.297329  | -2.216743  | -1.528990 |
| 49.C | 5.483587  | -2.480704  | -2.218576 |
| 50.C | 5.549692  | -2.284699  | -3.601836 |
| 51.C | 4.424385  | -1.829250  | -4.298875 |
| 52.C | 3.233859  | -1.571380  | -3.616584 |
| 53.H | 4.244733  | -2.371356  | -0.454915 |
| 54.H | 6.355100  | -2.839929  | -1.675668 |
| 55.H | 6.473787  | -2.492945  | -4.136436 |
| 56.H | 4.471829  | -1.684271  | -5.375728 |
| 57.C | -2.183070 | -2.853704  | 0.049317  |
| 58.C | -2.305991 | -4.245790  | -0.109485 |
| 59.C | -2.157409 | -5.092927  | 0.988567  |
| 60.C | -1.865592 | -4.565144  | 2.250605  |
| 61.C | -1.728347 | -3.183930  | 2.410036  |
| 62.C | -1.887132 | -2.329351  | 1.317429  |
| 63.H | -2.506474 | -4.664206  | -1.089173 |
| 64.H | -2.257253 | -6.166543  | 0.850592  |
| 65.H | -1.737775 | -5.228131  | 3.103283  |
| 66.H | -1.488250 | -2.767127  | 3.385009  |
| 67.C | -3.730090 | -2.365015  | -2.373669 |
| 68.C | -3.708056 | -2.196196  | -3.767314 |
| 69.C | -4.806062 | -2.590480  | -4.535599 |
| 70.C | -0.260319 | -4.984959  | -2.585553 |
| 71.C | -0.311882 | -6.398777  | -2.450593 |
| 72.C | -0.015063 | -7.010633  | -1.209424 |
| 73.C | -0.080574 | -8.395453  | -1.062661 |
| 74.C | -0.444320 | -9.206046  | -2.144652 |
| 75.C | -0.741638 | -8.614687  | -3.378636 |
| 76.C | -0.678155 | -7.230458  | -3.534180 |
| 77.C | -0.232653 | -3.760672  | -2.655925 |
| 78.H | 0.255023  | -6.382319  | -0.366933 |
| 79.H | 0.152041  | -8.846353  | -0.099776 |
| 80.H | -0.494840 | -10.286062 | -2.027806 |
| 81.H | -1.025683 | -9.237506  | -4.224543 |
| 82.H | -0.909531 | -6.770326  | -4.491168 |
| 83.H | -0.386237 | 0.604043   | -6.026517 |
| 84.H | 0.232849  | 2.144817   | -5.357104 |
| 85.O | -0.837477 | 1.633919   | -2.881783 |
| 86.C | -0.610125 | 0.857610   | -3.858269 |
| 87.N | -0.389115 | -0.430165  | -3.733539 |
| 88.H | -1.521480 | 1.888910   | -5.507005 |
| 89.C | -0.565975 | 1.396148   | -5.290696 |

### TS2-1

Imaginary frequency: -38.02 cm<sup>-1</sup>

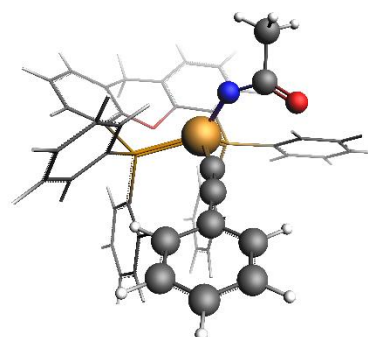

| Atom  | X         | Y         | Z (Angstrom) |
|-------|-----------|-----------|--------------|
| 1.O   | -0.447934 | 0.437821  | 0.809829     |
| 2.C   | -0.143555 | 3.219166  | 1.020808     |
| 3.C   | -1.484144 | 2.616064  | 0.635717     |
| 4.C   | -1.572461 | 1.226235  | 0.554612     |
| 5.C   | 2.955400  | 0.597448  | -0.507613    |
| 6.C   | 3.215123  | 1.966498  | -0.397075    |
| 7.C   | 2.233719  | 2.840664  | 0.084416     |
| 8.C   | 0.989991  | 2.352473  | 0.497826     |
| 9.C   | 0.770851  | 0.975047  | 0.404679     |
| 10.C  | 1.710777  | 0.075122  | -0.117173    |
| 11.C  | -2.637580 | 3.354751  | 0.345584     |
| 12.C  | -2.739857 | 0.539168  | 0.193696     |
| 13.H  | 3.706201  | -0.064541 | -0.926675    |
| 14.H  | 4.180594  | 2.356617  | -0.709338    |
| 15.H  | 2.432599  | 3.909278  | 0.137616     |
| 16.C  | -3.826240 | 2.704442  | -0.004974    |
| 17.C  | -3.880016 | 1.308265  | -0.083800    |
| 18.H  | -4.715408 | 3.288476  | -0.229104    |
| 19.H  | -4.800311 | 0.813995  | -0.378782    |
| 20.H  | -2.637608 | -0.151032 | 2.744132     |
| 21.H  | -2.602270 | 4.441501  | 0.392421     |
| 22.P  | -2.584892 | -1.271695 | -0.068058    |
| 23.P  | 1.161793  | -1.648078 | -0.474648    |
| 24.H  | 3.856042  | -2.799214 | 0.085579     |
| 25.H  | -0.075420 | 3.285034  | 2.119723     |
| 26.H  | 1.411080  | -0.882204 | 2.413507     |
| 27.H  | -0.054788 | 4.241798  | 0.637842     |
| 28.H  | -5.102171 | -1.157442 | 1.479270     |
| 29.Cu | -0.889036 | -1.970215 | -1.546663    |
| 30.C  | -6.878834 | -2.798495 | -0.918789    |
| 31.C  | -6.604088 | -2.129862 | 0.282129     |
| 32.C  | -5.316667 | -1.658623 | 0.538560     |
| 33.H  | -3.787029 | -2.728517 | -2.333197    |
| 34.H  | -6.057187 | -3.531828 | -2.781087    |
| 35.H  | -7.883027 | -3.168056 | -1.116078    |
| 36.H  | -7.390847 | -1.983398 | 1.019134     |
| 37.C  | 1.346026  | -2.586709 | 1.085542     |
| 38.C  | 1.355058  | -3.991920 | 1.003640     |
| 39.C  | 1.493204  | -4.756722 | 2.160685     |
| 40.C  | 1.596619  | -4.133173 | 3.409240     |

|      |           |           |           |
|------|-----------|-----------|-----------|
| 41.C | 1.554116  | -2.739419 | 3.495301  |
| 42.C | 1.433498  | -1.965107 | 2.338198  |
| 43.H | 1.250204  | -4.476734 | 0.037838  |
| 44.H | 1.511250  | -5.841687 | 2.086252  |
| 45.H | 1.697591  | -4.731701 | 4.311686  |
| 46.H | 1.615505  | -2.250458 | 4.464447  |
| 47.C | 2.509165  | -2.306341 | -1.532015 |
| 48.C | 2.315015  | -2.326804 | -2.922168 |
| 49.C | 3.312726  | -2.831308 | -3.759191 |
| 50.C | 4.505015  | -3.321705 | -3.216942 |
| 51.C | 4.702299  | -3.303263 | -1.831913 |
| 52.C | 3.707932  | -2.796998 | -0.990662 |
| 53.H | 1.373533  | -1.983851 | -3.342845 |
| 54.H | 3.147859  | -2.861972 | -4.833369 |
| 55.H | 5.273250  | -3.728839 | -3.870314 |
| 56.H | 5.625466  | -3.688850 | -1.405464 |
| 57.C | -2.295285 | -1.958894 | 1.612022  |
| 58.C | -1.980726 | -3.326589 | 1.685011  |
| 59.C | -1.796728 | -3.936834 | 2.925025  |
| 60.C | -1.905877 | -3.187744 | 4.100799  |
| 61.C | -2.202796 | -1.823790 | 4.031896  |
| 62.C | -2.400455 | -1.210262 | 2.791337  |
| 63.H | -1.873446 | -3.906057 | 0.770372  |
| 64.H | -1.548483 | -4.993426 | 2.972494  |
| 65.H | -1.749229 | -3.663998 | 5.065916  |
| 66.H | -2.282753 | -1.235364 | 4.943593  |
| 67.C | -4.293328 | -1.845767 | -0.409536 |
| 68.C | -4.565403 | -2.531568 | -1.601675 |
| 69.C | -5.860360 | -3.001672 | -1.852453 |
| 70.C | -0.031245 | -4.795491 | -2.411262 |
| 71.C | 0.580855  | -6.044851 | -2.689579 |
| 72.C | -0.161622 | -7.124525 | -3.221300 |
| 73.C | 0.458481  | -8.343664 | -3.490435 |
| 74.C | 1.824901  | -8.516393 | -3.234989 |
| 75.C | 2.571927  | -7.454039 | -2.711112 |
| 76.C | 1.962284  | -6.230028 | -2.440699 |
| 77.C | -0.505354 | -3.714597 | -2.082528 |
| 78.H | -1.219601 | -6.981036 | -3.422397 |
| 79.H | -0.124882 | -9.164233 | -3.903064 |
| 80.H | 2.303975  | -9.469937 | -3.445647 |
| 81.H | 3.634661  | -7.580888 | -2.514992 |
| 82.H | 2.542497  | -5.401843 | -2.044669 |
| 83.H | -1.870704 | -0.039898 | -5.037899 |
| 84.H | -3.499153 | -0.734711 | -5.328178 |
| 85.O | -2.909472 | -3.162066 | -4.328358 |
| 86.C | -2.283399 | -2.093897 | -4.169741 |
| 87.N | -1.490148 | -1.616786 | -3.246430 |
| 88.H | -2.076994 | -1.389830 | -6.199544 |
| 89.C | -2.428679 | -0.952703 | -5.259275 |

### TS2-2

Imaginary frequency: -203.75 cm<sup>-1</sup>

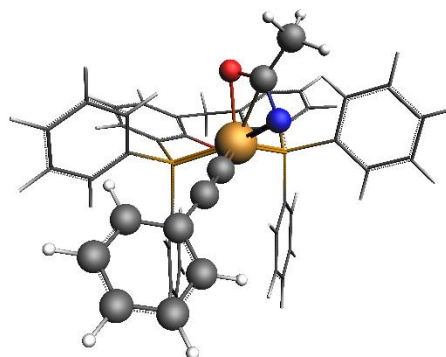

| Atom  | X         | Y         | Z (Angstrom) |
|-------|-----------|-----------|--------------|
| 1.O   | -0.507595 | 0.310141  | 0.960418     |
| 2.C   | -0.075237 | 3.011181  | 1.564516     |
| 3.C   | -1.424648 | 2.544043  | 1.047043     |
| 4.C   | -1.571583 | 1.186524  | 0.756574     |
| 5.C   | 2.947945  | 0.458742  | -0.210705    |
| 6.C   | 3.265220  | 1.789005  | 0.077524     |
| 7.C   | 2.312102  | 2.643280  | 0.644447     |
| 8.C   | 1.033945  | 2.169596  | 0.955662     |
| 9.C   | 0.754085  | 0.830016  | 0.671962     |
| 10.C  | 1.668544  | -0.045776 | 0.077241     |
| 11.C  | -2.528612 | 3.375148  | 0.825491     |
| 12.C  | -2.740859 | 0.626165  | 0.230652     |
| 13.H  | 3.683710  | -0.183112 | -0.683652    |
| 14.H  | 4.256986  | 2.166620  | -0.158322    |
| 15.H  | 2.560551  | 3.683794  | 0.843994     |
| 16.C  | -3.732033 | 2.842111  | 0.348051     |
| 17.C  | -3.840702 | 1.479412  | 0.049629     |
| 18.H  | -4.587386 | 3.494858  | 0.192773     |
| 19.H  | -4.768570 | 1.081165  | -0.347398    |
| 20.H  | -3.363416 | -0.484936 | 2.538603     |
| 21.H  | -2.446248 | 4.440786  | 1.030247     |
| 22.P  | -2.659959 | -1.133871 | -0.298483    |
| 23.P  | 1.079016  | -1.716738 | -0.441303    |
| 24.H  | 3.697519  | -3.079473 | 0.059285     |
| 25.H  | -0.050299 | 2.906724  | 2.662108     |
| 26.H  | 0.952033  | -1.128099 | 2.479044     |
| 27.H  | 0.078669  | 4.073208  | 1.344412     |
| 28.H  | -5.079888 | -2.704511 | 0.500060     |
| 29.Cu | -0.938374 | -2.011805 | -1.566380    |
| 30.C  | -6.742407 | -1.860673 | -2.351839    |
| 31.C  | -6.489675 | -2.458460 | -1.114217    |
| 32.C  | -5.273451 | -2.235299 | -0.460037    |
| 33.H  | -3.793672 | -0.206798 | -2.766706    |
| 34.H  | -5.960056 | -0.582009 | -3.909850    |
| 35.H  | -7.687409 | -2.038789 | -2.860023    |
| 36.H  | -7.237743 | -3.101337 | -0.655498    |
| 37.C  | 1.168481  | -2.753755 | 1.066718     |
| 38.C  | 1.264627  | -4.150220 | 0.923357     |
| 39.C  | 1.253378  | -4.972444 | 2.050309     |

|      |           |           |           |
|------|-----------|-----------|-----------|
| 40.C | 1.129666  | -4.416820 | 3.327940  |
| 41.C | 1.018872  | -3.031600 | 3.473094  |
| 42.C | 1.040048  | -2.201391 | 2.350463  |
| 43.H | 1.344184  | -4.588677 | -0.064254 |
| 44.H | 1.337872  | -6.049548 | 1.924719  |
| 45.H | 1.115808  | -5.060074 | 4.204929  |
| 46.H | 0.913273  | -2.592765 | 4.462456  |
| 47.C | 2.450178  | -2.282670 | -1.516195 |
| 48.C | 2.333138  | -2.043389 | -2.895577 |
| 49.C | 3.374553  | -2.408488 | -3.751218 |
| 50.C | 4.528425  | -3.016458 | -3.242616 |
| 51.C | 4.642433  | -3.258399 | -1.870028 |
| 52.C | 3.607945  | -2.887717 | -1.006021 |
| 53.H | 1.424636  | -1.594227 | -3.293202 |
| 54.H | 3.277606  | -2.229791 | -4.819476 |
| 55.H | 5.331833  | -3.309406 | -3.914915 |
| 56.H | 5.532646  | -3.738934 | -1.470797 |
| 57.C | -2.664619 | -2.086358 | 1.267762  |
| 58.C | -2.246942 | -3.427393 | 1.217993  |
| 59.C | -2.222457 | -4.194538 | 2.382960  |
| 60.C | -2.598853 | -3.628840 | 3.604936  |
| 61.C | -3.007345 | -2.292934 | 3.659601  |
| 62.C | -3.045107 | -1.523098 | 2.493961  |
| 63.H | -1.928194 | -3.861516 | 0.272754  |
| 64.H | -1.885637 | -5.226424 | 2.338298  |
| 65.H | -2.563260 | -4.224567 | 4.514164  |
| 66.H | -3.296680 | -1.848303 | 4.609489  |
| 67.C | -4.303030 | -1.413177 | -1.046494 |
| 68.C | -4.553971 | -0.826906 | -2.299486 |
| 69.C | -5.772880 | -1.040271 | -2.941468 |
| 70.C | 0.098803  | -4.818548 | -2.276072 |
| 71.C | 0.817508  | -6.038381 | -2.325014 |
| 72.C | 0.230851  | -7.256601 | -1.905579 |
| 73.C | 0.966667  | -8.441051 | -1.919532 |
| 74.C | 2.299379  | -8.444038 | -2.349926 |
| 75.C | 2.891529  | -7.245903 | -2.769094 |
| 76.C | 2.166647  | -6.055625 | -2.756630 |
| 77.C | -0.397007 | -3.708725 | -2.115551 |
| 78.H | -0.804450 | -7.252322 | -1.574398 |
| 79.H | 0.498361  | -9.368438 | -1.595465 |
| 80.H | 2.869457  | -9.370141 | -2.360114 |
| 81.H | 3.926962  | -7.239295 | -3.104209 |
| 82.H | 2.627406  | -5.125385 | -3.072825 |
| 83.H | -3.293064 | -2.261512 | -5.265010 |
| 84.H | -1.752290 | -1.732223 | -5.998096 |
| 85.O | -0.790307 | -0.869751 | -3.532435 |
| 86.C | -1.720157 | -1.711495 | -3.856688 |
| 87.N | -2.125010 | -2.706012 | -3.092810 |
| 88.H | -2.833709 | -0.526503 | -5.265189 |
| 89.C | -2.462711 | -1.554790 | -5.180841 |

### TS2-Curtius

Imaginary frequency: -398.34 cm<sup>-1</sup>

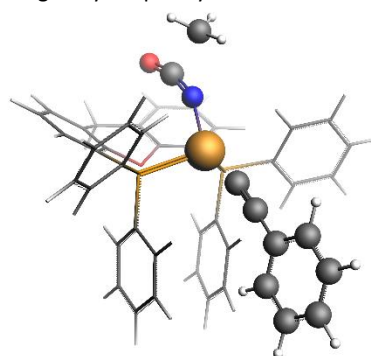

| Atom  | X         | Y         | Z (Angstrom) |
|-------|-----------|-----------|--------------|
| 1.O   | 0.302873  | 0.248059  | 0.035757     |
| 2.C   | 0.916995  | 2.992288  | -0.004490    |
| 3.C   | -0.517684 | 2.516135  | -0.141696    |
| 4.C   | -0.757403 | 1.143036  | -0.116438    |
| 5.C   | 3.503969  | -0.040887 | -1.707588    |
| 6.C   | 3.901408  | 1.298158  | -1.749526    |
| 7.C   | 3.086757  | 2.298874  | -1.209236    |
| 8.C   | 1.875034  | 1.972169  | -0.593545    |
| 9.C   | 1.512867  | 0.624984  | -0.549657    |
| 10.C  | 2.284877  | -0.402865 | -1.111294    |
| 11.C  | -1.617100 | 3.362266  | -0.322334    |
| 12.C  | -2.029395 | 0.576821  | -0.278574    |
| 13.H  | 4.124768  | -0.804312 | -2.165271    |
| 14.H  | 4.842566  | 1.564296  | -2.224381    |
| 15.H  | 3.388724  | 3.342549  | -1.273385    |
| 16.C  | -2.906000 | 2.835062  | -0.456739    |
| 17.C  | -3.114198 | 1.452186  | -0.437715    |
| 18.H  | -3.751817 | 3.504397  | -0.592900    |
| 19.H  | -4.113367 | 1.048064  | -0.569774    |
| 20.H  | -1.707531 | -3.911093 | 0.568828     |
| 21.H  | -1.460955 | 4.438446  | -0.364352    |
| 22.P  | -2.119600 | -1.249042 | -0.444479    |
| 23.P  | 1.528197  | -2.076265 | -1.238229    |
| 24.H  | 4.228576  | -3.272756 | -0.780861    |
| 25.H  | 1.151825  | 3.141532  | 1.062815     |
| 26.H  | 1.990126  | -1.022673 | 1.534074     |
| 27.H  | 1.046226  | 3.963049  | -0.495388    |
| 28.H  | -4.571493 | -1.634317 | 1.233471     |
| 29.Cu | -0.671890 | -2.209230 | -1.975478    |
| 30.C  | -6.557373 | -2.041811 | -1.507314    |
| 31.C  | -6.190197 | -1.943807 | -0.160608    |
| 32.C  | -4.858314 | -1.702490 | 0.187477     |
| 33.H  | -3.493583 | -1.589460 | -2.934825    |
| 34.H  | -5.870418 | -1.991909 | -3.555000    |
| 35.H  | -7.593383 | -2.235413 | -1.775801    |
| 36.H  | -6.940138 | -2.059929 | 0.618803     |
| 37.C  | 1.724781  | -2.851178 | 0.410906     |
| 38.C  | 1.606326  | -4.250570 | 0.495168     |
| 39.C  | 1.705365  | -4.886996 | 1.732181     |
| 40.C  | 1.895462  | -4.138050 | 2.898129     |

|      |           |            |           |
|------|-----------|------------|-----------|
| 41.C | 1.988631  | -2.746383  | 2.820686  |
| 42.C | 1.909163  | -2.103495  | 1.582537  |
| 43.H | 1.424305  | -4.832598  | -0.402847 |
| 44.H | 1.623385  | -5.970122  | 1.784109  |
| 45.H | 1.960418  | -4.636213  | 3.862616  |
| 46.H | 2.122341  | -2.156364  | 3.724353  |
| 47.C | 2.702677  | -3.010461  | -2.289082 |
| 48.C | 2.330450  | -3.279413  | -3.614438 |
| 49.C | 3.196356  | -3.979787  | -4.459090 |
| 50.C | 4.434239  | -4.421953  | -3.982493 |
| 51.C | 4.806681  | -4.163645  | -2.657663 |
| 52.C | 3.944679  | -3.462159  | -1.812680 |
| 53.H | 1.356123  | -2.954826  | -3.970667 |
| 54.H | 2.898580  | -4.191691  | -5.483377 |
| 55.H | 5.104163  | -4.974526  | -4.637364 |
| 56.H | 5.765912  | -4.513498  | -2.282466 |
| 57.C | -1.884758 | -1.874072  | 1.262830  |
| 58.C | -1.861445 | -1.025557  | 2.379452  |
| 59.C | -1.682532 | -1.557782  | 3.659571  |
| 60.C | -1.531851 | -2.936362  | 3.831768  |
| 61.C | -1.552766 | -3.783176  | 2.718878  |
| 62.C | -1.721032 | -3.258564  | 1.437710  |
| 63.H | -1.982573 | 0.046173   | 2.250721  |
| 64.H | -1.662468 | -0.893471  | 4.520986  |
| 65.H | -1.388598 | -3.348422  | 4.828301  |
| 66.H | -1.421436 | -4.854600  | 2.845783  |
| 67.C | -3.885672 | -1.561287  | -0.813364 |
| 68.C | -4.255927 | -1.672190  | -2.163607 |
| 69.C | -5.589131 | -1.904033  | -2.507966 |
| 70.C | -1.107969 | -5.270493  | -1.593996 |
| 71.C | -1.232208 | -6.635586  | -1.218977 |
| 72.C | -1.627227 | -7.630577  | -2.143694 |
| 73.C | -1.738908 | -8.964716  | -1.752513 |
| 74.C | -1.461086 | -9.345338  | -0.433649 |
| 75.C | -1.070805 | -8.372344  | 0.494307  |
| 76.C | -0.958652 | -7.036135  | 0.112017  |
| 77.C | -0.984362 | -4.076798  | -1.863250 |
| 78.H | -1.844179 | -7.335808  | -3.167052 |
| 79.H | -2.046024 | -9.713378  | -2.480172 |
| 80.H | -1.548054 | -10.386934 | -0.133012 |
| 81.H | -0.853257 | -8.657988  | 1.521836  |
| 82.H | -0.654973 | -6.282076  | 0.831941  |
| 83.H | -1.143594 | -1.096497  | -5.508079 |
| 84.H | 0.123437  | 0.207143   | -5.712801 |
| 85.O | -0.058570 | 1.569812   | -3.273244 |
| 86.C | -0.382454 | 0.421558   | -3.449860 |
| 87.N | -0.644737 | -0.773911  | -3.214459 |
| 88.H | -1.632795 | 0.663587   | -5.401899 |
| 89.C | -0.841786 | -0.076322  | -5.298275 |

E

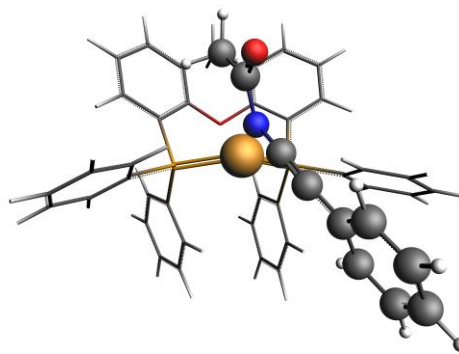

| Atom  | X         | Y         | Z (Angstrom) |
|-------|-----------|-----------|--------------|
| 1.O   | -0.620637 | -0.000348 | -0.201112    |
| 2.C   | -1.258318 | 2.697825  | 0.204949     |
| 3.C   | -2.280871 | 1.742794  | -0.388188    |
| 4.C   | -1.903671 | 0.409717  | -0.569118    |
| 5.C   | 2.678333  | 1.343703  | -1.019850    |
| 6.C   | 2.459961  | 2.710946  | -0.820627    |
| 7.C   | 1.200816  | 3.182779  | -0.432651    |
| 8.C   | 0.146218  | 2.290199  | -0.206854    |
| 9.C   | 0.400872  | 0.930973  | -0.393766    |
| 10.C  | 1.636666  | 0.424923  | -0.821730    |
| 11.C  | -3.572221 | 2.110969  | -0.780008    |
| 12.C  | -2.737532 | -0.561630 | -1.144268    |
| 13.H  | 3.646435  | 0.989296  | -1.360690    |
| 14.H  | 3.271433  | 3.414497  | -0.988360    |
| 15.H  | 1.033454  | 4.250735  | -0.307642    |
| 16.C  | -4.445138 | 1.162424  | -1.323434    |
| 17.C  | -4.032001 | -0.159938 | -1.511894    |
| 18.H  | -5.447346 | 1.458582  | -1.622469    |
| 19.H  | -4.703453 | -0.875573 | -1.975249    |
| 20.H  | -1.950878 | -1.506116 | 1.335359     |
| 21.H  | -3.893081 | 3.144243  | -0.661993    |
| 22.P  | -2.002349 | -2.192931 | -1.602738    |
| 23.P  | 1.701788  | -1.353307 | -1.294445    |
| 24.H  | 2.582816  | -1.350366 | -4.028368    |
| 25.H  | -1.336259 | 2.675895  | 1.304808     |
| 26.H  | 2.209153  | -0.523264 | 1.546804     |
| 27.H  | -1.467728 | 3.727364  | -0.105403    |
| 28.H  | -4.593718 | -3.449247 | -0.803311    |
| 29.Cu | -0.061845 | -1.742144 | -2.615009    |
| 30.C  | -5.320893 | -4.361577 | -4.006151    |
| 31.C  | -5.470166 | -4.206439 | -2.621247    |
| 32.C  | -4.484686 | -3.553332 | -1.879861    |
| 33.H  | -2.310798 | -2.827771 | -4.412608    |
| 34.H  | -4.050534 | -3.994512 | -5.717467    |
| 35.H  | -6.085526 | -4.881494 | -4.579051    |
| 36.H  | -6.351394 | -4.600459 | -2.119699    |
| 37.C  | 1.802307  | -2.242291 | 0.304686     |
| 38.C  | 1.603079  | -3.632404 | 0.286333     |
| 39.C  | 1.689869  | -4.370792 | 1.465497     |
| 40.C  | 1.953834  | -3.726511 | 2.678888     |
| 41.C  | 2.134250  | -2.340990 | 2.706580     |

|      |           |           |           |
|------|-----------|-----------|-----------|
| 42.C | 2.062761  | -1.599709 | 1.523231  |
| 43.H | 1.370739  | -4.130984 | -0.652215 |
| 44.H | 1.529743  | -5.445259 | 1.441762  |
| 45.H | 2.007996  | -4.302091 | 3.599964  |
| 46.H | 2.333657  | -1.835098 | 3.648895  |
| 47.C | 3.371479  | -1.547575 | -2.025052 |
| 48.C | 4.522345  | -1.752208 | -1.247453 |
| 49.C | 5.770215  | -1.869324 | -1.864507 |
| 50.C | 5.875585  | -1.782802 | -3.257691 |
| 51.C | 4.730066  | -1.587372 | -4.035767 |
| 52.C | 3.478227  | -1.477047 | -3.424564 |
| 53.H | 4.440096  | -1.825677 | -0.166117 |
| 54.H | 6.659559  | -2.030946 | -1.259267 |
| 55.H | 6.847942  | -1.876994 | -3.735666 |
| 56.H | 4.805571  | -1.531892 | -5.119081 |
| 57.C | -1.912006 | -3.168478 | -0.046215 |
| 58.C | -1.794787 | -4.565398 | -0.160864 |
| 59.C | -1.668197 | -5.360233 | 0.977761  |
| 60.C | -1.636350 | -4.769853 | 2.245806  |
| 61.C | -1.731485 | -3.381680 | 2.364463  |
| 62.C | -1.872435 | -2.582526 | 1.226419  |
| 63.H | -1.819211 | -5.031036 | -1.143313 |
| 64.H | -1.590880 | -6.440424 | 0.874698  |
| 65.H | -1.530164 | -5.388154 | 3.133892  |
| 66.H | -1.696930 | -2.915165 | 3.346062  |
| 67.C | -3.342026 | -3.043752 | -2.522900 |
| 68.C | -3.198854 | -3.197897 | -3.909545 |
| 69.C | -4.185228 | -3.860627 | -4.647386 |
| 70.N | 0.060518  | -1.342331 | -4.544623 |
| 71.H | 1.233463  | 1.079375  | -3.623453 |
| 72.H | -0.064424 | -4.113228 | -8.457350 |
| 73.O | 0.340795  | 0.092883  | -6.354754 |
| 74.C | 0.225377  | -0.095713 | -5.141271 |
| 75.H | -0.692750 | -6.264089 | -9.523344 |
| 76.C | 0.264262  | 1.056391  | -4.136197 |
| 77.H | -0.511048 | 0.946283  | -3.368680 |
| 78.H | 0.127293  | 2.000850  | -4.667106 |
| 79.C | -0.799881 | -6.144004 | -8.446924 |
| 80.C | -0.443392 | -4.933893 | -7.854048 |
| 81.C | -0.061311 | -2.435258 | -5.298021 |
| 82.H | -1.184511 | -5.696254 | -4.612013 |
| 83.H | -1.808676 | -7.846957 | -5.675205 |
| 84.H | -1.569456 | -8.143898 | -8.140271 |
| 85.C | -0.244501 | -3.515059 | -5.840255 |
| 86.C | -0.573533 | -4.746234 | -6.455747 |
| 87.C | -1.071816 | -5.827298 | -5.685099 |
| 88.C | -1.425106 | -7.033153 | -6.288080 |
| 89.C | -1.293136 | -7.201943 | -7.672126 |

F

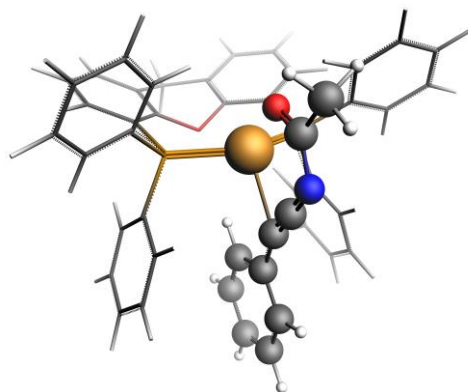

| Atom  | X         | Y         | Z (Angstrom) |
|-------|-----------|-----------|--------------|
| 1.O   | -0.698798 | 0.290894  | -0.776895    |
| 2.C   | -0.418294 | 3.033359  | -1.124324    |
| 3.C   | -1.617260 | 2.484473  | -0.375069    |
| 4.C   | -1.699909 | 1.094096  | -0.221556    |
| 5.C   | 2.932989  | 0.443140  | -0.266670    |
| 6.C   | 3.162037  | 1.811790  | -0.423049    |
| 7.C   | 2.098079  | 2.678906  | -0.695264    |
| 8.C   | 0.799152  | 2.181138  | -0.823973    |
| 9.C   | 0.596666  | 0.805005  | -0.661026    |
| 10.C  | 1.637614  | -0.089852 | -0.375760    |
| 11.C  | -2.626602 | 3.273270  | 0.181522     |
| 12.C  | -2.736564 | 0.467774  | 0.484124     |
| 13.H  | 3.762436  | -0.218553 | -0.039655    |
| 14.H  | 4.171438  | 2.204035  | -0.326154    |
| 15.H  | 2.275324  | 3.746574  | -0.810245    |
| 16.C  | -3.692124 | 2.678004  | 0.866203     |
| 17.C  | -3.743132 | 1.291261  | 1.017988     |
| 18.H  | -4.477011 | 3.297223  | 1.293441     |
| 19.H  | -4.558057 | 0.839486  | 1.574892     |
| 20.H  | -1.906667 | -1.464741 | 3.490770     |
| 21.H  | -2.576779 | 4.355695  | 0.078306     |
| 22.P  | -2.711074 | -1.365461 | 0.731306     |
| 23.P  | 1.255279  | -1.883923 | -0.138184    |
| 24.H  | 1.540389  | -4.597867 | -1.091071    |
| 25.H  | -0.238293 | 4.080642  | -0.859629    |
| 26.H  | 4.015375  | -2.776924 | -0.923953    |
| 27.H  | -0.621497 | 3.006396  | -2.208205    |
| 28.H  | -3.963244 | -3.935901 | 0.298182     |
| 29.CU | -0.733305 | -2.460449 | 0.756408     |
| 30.C  | -5.383116 | -3.046721 | -2.664748    |
| 31.C  | -5.027312 | -3.840832 | -1.569435    |
| 32.C  | -4.265333 | -3.304780 | -0.532200    |
| 33.H  | -3.916146 | -0.125186 | -1.715545    |
| 34.H  | -5.262426 | -1.084412 | -3.556705    |
| 35.H  | -5.959035 | -3.473110 | -3.482520    |
| 36.H  | -5.323173 | -4.886403 | -1.533865    |
| 37.C  | 2.729621  | -2.480991 | 0.789163     |
| 38.C  | 2.630799  | -2.571724 | 2.187130     |
| 39.C  | 3.729315  | -2.993296 | 2.941531     |



|      |           |           |           |
|------|-----------|-----------|-----------|
| 40.C | 4.929691  | -3.333471 | 2.309901  |
| 41.C | 5.029597  | -3.253921 | 0.916488  |
| 42.C | 3.935658  | -2.829772 | 0.158231  |
| 43.H | 1.686475  | -2.347228 | 2.675303  |
| 44.H | 3.642041  | -3.067236 | 4.023450  |
| 45.H | 5.781244  | -3.668073 | 2.898602  |
| 46.H | 5.958918  | -3.523594 | 0.419194  |
| 47.C | 1.530326  | -2.563979 | -1.824052 |
| 48.C | 1.570244  | -1.753821 | -2.967245 |
| 49.C | 1.659738  | -2.332198 | -4.236625 |
| 50.C | 1.713185  | -3.721151 | -4.374912 |
| 51.C | 1.688598  | -4.533455 | -3.236720 |
| 52.C | 1.593804  | -3.960826 | -1.969254 |
| 53.H | 1.525542  | -0.673103 | -2.870955 |
| 54.H | 1.680456  | -1.694726 | -5.117985 |
| 55.H | 1.764494  | -4.170011 | -5.363743 |
| 56.H | 1.716680  | -5.615432 | -3.337340 |
| 57.C | -3.691584 | -1.553408 | 2.277996  |
| 58.C | -5.087770 | -1.705619 | 2.289302  |
| 59.C | -5.771912 | -1.832278 | 3.501396  |
| 60.C | -5.070213 | -1.803282 | 4.711538  |
| 61.C | -3.679124 | -1.652840 | 4.704948  |
| 62.C | -2.990292 | -1.534445 | 3.495553  |
| 63.H | -5.637047 | -1.733039 | 1.352714  |
| 64.H | -6.852964 | -1.954599 | 3.499907  |
| 65.H | -5.603963 | -1.905945 | 5.653771  |
| 66.H | -3.126740 | -1.642048 | 5.641990  |
| 67.C | -3.854329 | -1.960861 | -0.576046 |
| 68.C | -4.226487 | -1.165031 | -1.669273 |
| 69.C | -4.987303 | -1.707671 | -2.708552 |
| 70.H | -2.340974 | -4.514187 | -5.647448 |
| 71.H | -1.366563 | -2.333256 | -2.066903 |
| 72.O | -0.439322 | -3.169752 | 2.710726  |
| 73.C | -0.602265 | -4.424467 | 2.915463  |
| 74.N | -0.929554 | -5.316698 | 1.966361  |
| 75.H | -1.864158 | -2.359019 | -4.485733 |
| 76.C | -0.408972 | -4.943166 | 4.322716  |
| 77.H | -0.583876 | -6.019890 | 4.375873  |
| 78.H | -1.095786 | -4.420620 | 5.000067  |
| 79.C | -1.857508 | -3.292825 | -3.928541 |
| 80.C | -1.577588 | -3.271892 | -2.566329 |
| 81.C | -1.102256 | -4.899023 | 0.739154  |
| 82.H | -1.820122 | -6.606568 | -1.913627 |
| 83.H | -2.318670 | -6.640110 | -4.343886 |
| 84.H | 0.611922  | -4.717746 | 4.655956  |
| 85.C | -1.267443 | -4.467944 | -0.415337 |
| 86.C | -1.556363 | -4.464603 | -1.812394 |
| 87.C | -1.831746 | -5.680474 | -2.482621 |
| 88.C | -2.110809 | -5.693669 | -3.848073 |
| 89.C | -2.124985 | -4.500808 | -4.581728 |

### TS3

Imaginary frequency: -67.37 cm<sup>-1</sup>

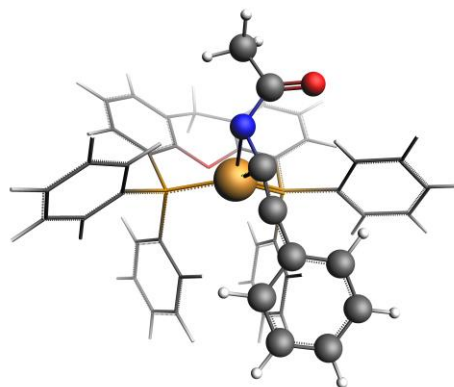

| Atom  | X         | Y         | Z (Angstrom) |
|-------|-----------|-----------|--------------|
| 1.O   | -0.601811 | -0.205674 | -0.324793    |
| 2.C   | -1.198208 | 2.358505  | 0.634209     |
| 3.C   | -2.236060 | 1.563107  | -0.139548    |
| 4.C   | -1.875647 | 0.294870  | -0.602227    |
| 5.C   | 2.723872  | 1.227258  | -0.835787    |
| 6.C   | 2.521864  | 2.530498  | -0.368009    |
| 7.C   | 1.266654  | 2.930520  | 0.104156     |
| 8.C   | 0.198209  | 2.026652  | 0.136425     |
| 9.C   | 0.432461  | 0.730014  | -0.326971    |
| 10.C  | 1.669248  | 0.301895  | -0.832558    |
| 11.C  | -3.525559 | 2.020339  | -0.432495    |
| 12.C  | -2.722963 | -0.515846 | -1.372402    |
| 13.H  | 3.693260  | 0.930670  | -1.224840    |
| 14.H  | 3.344770  | 3.240769  | -0.383198    |
| 15.H  | 1.113598  | 3.950826  | 0.451016     |
| 16.C  | -4.414100 | 1.219654  | -1.159067    |
| 17.C  | -4.015952 | -0.033800 | -1.632993    |
| 18.H  | -5.415917 | 1.582251  | -1.375241    |
| 19.H  | -4.696218 | -0.629877 | -2.232990    |
| 20.H  | -2.221163 | -1.981012 | 0.838600     |
| 21.H  | -3.833182 | 3.006743  | -0.090464    |
| 22.P  | -2.021596 | -2.023312 | -2.167439    |
| 23.P  | 1.747778  | -1.376892 | -1.581168    |
| 24.H  | 2.786649  | -0.883523 | -4.207347    |
| 25.H  | -1.270808 | 2.106719  | 1.705644     |
| 26.H  | 2.220786  | -1.041694 | 1.369017     |
| 27.H  | -1.393879 | 3.433078  | 0.549342     |
| 28.H  | -4.465920 | -3.706261 | -1.807945    |
| 29.Cu | 0.035367  | -1.723704 | -2.939876    |
| 30.C  | -5.329222 | -3.430177 | -5.091130    |
| 31.C  | -5.396334 | -3.817553 | -3.746920    |
| 32.C  | -4.414902 | -3.397270 | -2.848110    |
| 33.H  | -2.467748 | -1.596221 | -5.014443    |
| 34.H  | -4.213229 | -2.314844 | -6.573370    |
| 35.H  | -6.092562 | -3.763805 | -5.790913    |
| 36.H  | -6.211459 | -4.448969 | -3.399663    |
| 37.C  | 1.739007  | -2.510373 | -0.139865    |
| 38.C  | 1.449464  | -3.862230 | -0.386332    |

|      |           |           |           |
|------|-----------|-----------|-----------|
| 39.C | 1.457324  | -4.783060 | 0.660372  |
| 40.C | 1.730311  | -4.360302 | 1.965666  |
| 41.C | 1.999237  | -3.012186 | 2.219627  |
| 42.C | 2.008380  | -2.088593 | 1.169790  |
| 43.H | 1.201325  | -4.188055 | -1.393146 |
| 44.H | 1.224712  | -5.824796 | 0.460188  |
| 45.H | 1.720877  | -5.077232 | 2.783581  |
| 46.H | 2.202772  | -2.677911 | 3.234709  |
| 47.C | 3.452726  | -1.486245 | -2.239231 |
| 48.C | 4.545458  | -1.884878 | -1.452900 |
| 49.C | 5.822297  | -1.950352 | -2.016008 |
| 50.C | 6.013864  | -1.617681 | -3.361982 |
| 51.C | 4.924163  | -1.227437 | -4.148327 |
| 52.C | 3.642714  | -1.164825 | -3.594616 |
| 53.H | 4.395952  | -2.151108 | -0.409904 |
| 54.H | 6.666832  | -2.263633 | -1.405818 |
| 55.H | 7.008637  | -1.672697 | -3.798307 |
| 56.H | 5.068171  | -0.982394 | -5.198172 |
| 57.C | -1.997513 | -3.309472 | -0.853069 |
| 58.C | -1.820319 | -4.646228 | -1.253433 |
| 59.C | -1.773099 | -5.664359 | -0.302659 |
| 60.C | -1.875304 | -5.360470 | 1.059688  |
| 61.C | -2.025200 | -4.031232 | 1.463249  |
| 62.C | -2.091455 | -3.008120 | 0.512572  |
| 63.H | -1.733778 | -4.893290 | -2.306407 |
| 64.H | -1.644774 | -6.692572 | -0.632284 |
| 65.H | -1.829244 | -6.153820 | 1.802318  |
| 66.H | -2.093805 | -3.786527 | 2.520725  |
| 67.C | -3.352988 | -2.590126 | -3.291149 |
| 68.C | -3.287884 | -2.202501 | -4.638612 |
| 69.C | -4.279339 | -2.618670 | -5.531519 |
| 70.N | 0.557275  | -0.928433 | -5.051004 |
| 71.H | 0.864132  | 1.535497  | -4.766286 |
| 72.H | -2.056417 | -4.673640 | -5.434146 |
| 73.O | -1.256249 | -0.385141 | -6.425695 |
| 74.C | -0.305941 | -0.055757 | -5.700461 |
| 75.H | -2.722936 | -6.973973 | -4.796709 |
| 76.C | 0.012793  | 1.413689  | -5.441024 |
| 77.H | -0.872099 | 1.898032  | -5.010681 |
| 78.H | 0.222072  | 1.910936  | -6.395640 |
| 79.C | -1.742694 | -6.598365 | -4.510507 |
| 80.C | -1.371606 | -5.306795 | -4.879305 |
| 81.C | 0.326579  | -2.233207 | -5.062167 |
| 82.H | 1.743930  | -5.233786 | -3.489347 |
| 83.H | 1.071755  | -7.529847 | -2.833932 |
| 84.H | -1.170391 | -8.411682 | -3.476573 |
| 85.C | 0.230613  | -3.434887 | -4.788953 |
| 86.C | -0.108694 | -4.782321 | -4.505358 |
| 87.C | 0.767577  | -5.619536 | -3.771131 |
| 88.C | 0.385013  | -6.908296 | -3.405013 |
| 89.C | -0.873555 | -7.406424 | -3.765964 |

2a

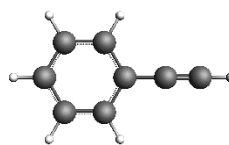

| Atom | X         | Y         | Z (Angstrom) |
|------|-----------|-----------|--------------|
| 1.C  | 2.001503  | -0.000002 | 0.000381     |
| 2.C  | 0.575201  | -0.000008 | 0.000148     |
| 3.C  | -0.141956 | -1.215878 | -0.000010    |
| 4.C  | -1.536754 | -1.210816 | -0.000237    |
| 5.C  | -2.239052 | 0.000005  | -0.000312    |
| 6.C  | -1.536762 | 1.210834  | -0.000157    |
| 7.C  | -0.141961 | 1.215860  | 0.000071     |
| 8.C  | 3.212203  | 0.000005  | 0.000579     |
| 9.H  | 0.407103  | -2.153372 | 0.000049     |
| 10.H | -2.077742 | -2.154281 | -0.000357    |
| 11.H | -3.326492 | -0.000003 | -0.000490    |
| 12.H | -2.077734 | 2.154308  | -0.000214    |
| 13.H | 0.407111  | 2.153347  | 0.000192     |
| 14.H | 4.278233  | 0.000004  | 0.000753     |

Dioxazolone

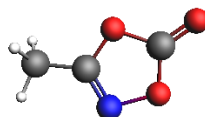

| Atom | X         | Y         | Z (Angstrom) |
|------|-----------|-----------|--------------|
| 1.O  | -0.423706 | -0.062479 | 0.683514     |
| 2.C  | -0.623719 | 0.978937  | -0.187368    |
| 3.O  | -1.935234 | 0.826699  | -0.699641    |
| 4.C  | -2.435179 | -0.301192 | -0.097898    |
| 5.N  | -1.629916 | -0.885546 | 0.722544     |
| 6.O  | 0.137581  | 1.852693  | -0.473576    |
| 7.C  | -3.815660 | -0.741922 | -0.426305    |
| 8.H  | -4.047743 | -1.651007 | 0.133577     |
| 9.H  | -3.902005 | -0.939550 | -1.501034    |
| 10.H | -4.534016 | 0.043987  | -0.165392    |

CO<sub>2</sub>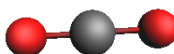

| Atom | X         | Y         | Z (Angstrom) |
|------|-----------|-----------|--------------|
| 1.C  | 0.000000  | 0.000000  | 0.000000     |
| 2.O  | -0.000001 | -0.000005 | -1.172533    |
| 3.O  | 0.000001  | 0.000005  | 1.172533     |

iPr<sub>2</sub>NH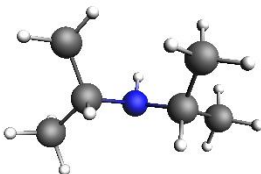

| Atom | X         | Y         | Z (Angstrom) |
|------|-----------|-----------|--------------|
| 1.C  | -2.520089 | -0.768093 | 0.288224     |
| 2.C  | -1.291944 | -0.101443 | -0.349173    |
| 3.C  | 1.229335  | -0.184438 | -0.225156    |
| 4.C  | 2.163052  | -1.408384 | -0.278574    |
| 5.C  | -1.460704 | 1.435329  | -0.391209    |
| 6.C  | 1.894470  | 0.978164  | 0.539403     |
| 7.N  | -0.081004 | -0.580615 | 0.344390     |
| 8.H  | -2.629616 | -0.450985 | 1.335055     |
| 9.H  | -2.416929 | -1.857824 | 0.271011     |
| 10.H | -3.437979 | -0.487457 | -0.241541    |
| 11.H | -1.208689 | -0.461716 | -1.385609    |
| 12.H | -0.126198 | -0.330837 | 1.333887     |
| 13.H | 1.043619  | 0.143014  | -1.258009    |
| 14.H | 3.123133  | -1.156993 | -0.748054    |
| 15.H | 1.693128  | -2.219654 | -0.844352    |
| 16.H | 2.362760  | -1.777232 | 0.735935     |
| 17.H | -2.369341 | 1.713967  | -0.940724    |
| 18.H | -0.611036 | 1.920308  | -0.884236    |
| 19.H | -1.541439 | 1.839043  | 0.627135     |
| 20.H | 1.255698  | 1.867318  | 0.553726     |
| 21.H | 2.856553  | 1.251363  | 0.087924     |
| 22.H | 2.090122  | 0.681397  | 1.579348     |

[AcOH][HNiPr<sub>2</sub>]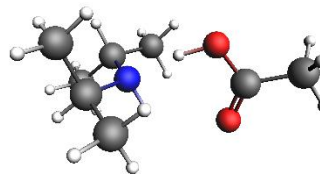

| Atom | X         | Y         | Z (Angstrom) |
|------|-----------|-----------|--------------|
| 1.H  | -3.579096 | 1.079082  | 1.375234     |
| 2.C  | -3.926844 | -0.938664 | 0.727025     |
| 3.O  | -2.729221 | -1.166972 | 0.152408     |
| 4.O  | -4.641059 | -1.821086 | 1.196390     |
| 5.C  | -4.290890 | 0.535060  | 0.742173     |
| 6.H  | -4.214039 | 0.954011  | -0.267292    |
| 7.H  | -5.302534 | 0.663425  | 1.131536     |
| 8.H  | -1.277156 | -2.310229 | 2.305287     |
| 9.H  | -0.773424 | -3.638529 | 3.374464     |
| 10.H | -0.493985 | -4.225838 | 0.948502     |
| 11.H | -3.401949 | -3.817223 | 0.865745     |
| 12.H | -2.750625 | -5.661283 | -0.652316    |
| 13.H | -1.381239 | -4.967925 | -2.628481    |
| 14.H | -0.421437 | -4.918503 | -1.144220    |
| 15.H | -1.041903 | -3.407605 | -1.844949    |
| 16.H | -0.933948 | -6.041082 | 2.615280     |
| 17.H | -1.637305 | -6.460893 | 1.047380     |
| 18.H | -2.681150 | -5.864632 | 2.355833     |
| 19.H | -4.696993 | -4.113376 | -1.056293    |
| 20.H | -3.917757 | -4.642192 | -2.562695    |
| 21.H | -2.537071 | -2.191426 | 0.207105     |
| 22.H | -3.619031 | -3.007836 | -1.927834    |
| 23.H | -2.498503 | -3.328494 | 3.090492     |
| 24.C | -1.507102 | -3.332762 | 2.620244     |
| 25.C | -1.478790 | -4.299092 | 1.425871     |
| 26.C | -2.573407 | -4.592682 | -0.856776    |
| 27.C | -1.273080 | -4.464019 | -1.661532    |
| 28.C | -1.696880 | -5.754299 | 1.881831     |
| 29.C | -3.775880 | -4.055968 | -1.647982    |
| 30.N | -2.476869 | -3.832498 | 0.420945     |

## REFERENCES IN THE SI

- (1) (a) M. R. Rodríguez, Á. Beltrán, Á. L. Mudarra, E. Álvarez, F. Maseras, M. M. Díaz-Requejo, P. J. Pérez, *Angew. Chemie - Int. Ed.* **2017**, *56*, 12842–12847, (b) C. Martín, M. Sierra, E. Alvarez, T. R. Belderrain, P. J. Pérez, *Dalt. Trans.* **2012**, *41*, 5319–5325, (c) I. Rivilla, W. M. C. Sameera, E. Alvarez, M. M. Díaz-Requejo, F. Maseras, P. J. Pérez, *Dalt. Trans.* **2013**, *42*, 4132.
- (2) J. Huang, J. Chan, Y. Chen, C. J. Borths, K. D. Baucom, R. D. Larsen, M. M. Faul, *J. Am. Chem. Soc.* **2010**, *132*, 3674–3675.
- (3) K. Semba, T. Fujihara, T. Xu, J. Terao, Y. Tsuji, *Adv. Synth. Catal.* **2012**, *354*, 1542–1550.
- (4) A. Jakob, Y. Shen, T. Wächtler, S. E. Schulz, T. Gessner, R. Riedel, C. Fasel, H. Lang, *Zeitschrift für Anorg. und Allg. Chemie* **2008**, *634*, 2226–2234.

- 
- (5) Purification of laboratory chemicals
- (6) S. Gonell, X. Caumes, N. Orth, I. Ivanović-Burmasović, J. N. H. Reek, *Chem. Sci.* **2019**, *10*, 1316–1321.
- (7) G. N. Papadopoulos, C. G. Kokotos, *Chem. - A Eur. J.* **2016**, *22*, 6964–6967.
- (8) S. Y. Hong, Y. Park, Y. Hwang, Y. B. Kim, M. H. Baik, S. Chang, *Science* **2018**, *359*, 1016–1021.
- (9) H. Wang, Y. Park, Z. Bai, S. Chang, G. He, G. Chen, *J. Am. Chem. Soc.* **2019**, *141*, 7194–7201.
- (10) H. Lei, T. Rovis, *J. Am. Chem. Soc.* **2019**, *141*, 2268–2273.
- (11) V. Bizet, C. Bolm, *European J. Org. Chem.* **2015**, *2015*, 2854–2860.
- (12) J. I. Yamaguchi, Y. Murayama, T. Suyama, *Bull. Chem. Soc. Jpn.* **2002**, *75*, 329–333.
- (13) (a) A. Chirila, M. B. Brands, B. de Bruin, *J. Catal.* **2018**, *361*, 347–360. (b) L. Luconi, E. S. Osipova, G. Giambastiani, M. Peruzzini, A. Rossin, N. V. Belkova, O. A. Filippov, E. M. Titova, A. A. Pavlov, E. S. Shubina, *Organometallics* **2018**, *37*, 3153.
- (14) Bruker, *APEX2* software, Madison WI, USA, **2016**
- (15) G. M. Sheldrick, *SADABS*, Universität Göttingen, Germany, **2008**.
- (16) G. M. Sheldrick, *Acta Cryst. A* **2015**, *71*, 3–8.
- (17) G. M. Sheldrick, *SHELXL2014*, University of Göttingen, Germany, **2014**.
- (18) (a) ADF2017, SCM, Theoretical Chemistry, Vrije Universiteit, Amsterdam, The Netherlands, <http://www.scm.com>, (b) G. te Velde, F. M. Bickelhaupt, E. J. Baerends, C. Fonseca Guerra, S. J. A. van Gisbergen, J. G. Snijders, T. Ziegler, *J. Comput. Chem.* **2001**, *22*, 931–967. (c) C. Fonseca Guerra, J. G. Snijders, G. te Velde, E. J. Baerends, *Theor. Chem. Acc.* **1998**, *99*, 391.
- (19) W. Kohn, L. J. Sham, *Phys. Rev.* **1965**, *140*, A1133–A1138.
- (20) (a) A. D. Becke, *Phys. Rev. A* **1988**, *38*, 3098–3100. (b) C. Lee, W. Yang, R. G. Parr, *Phys. Rev. B* **1988**, *37*, 785–789. (c) S. Grimme, S. Ehrlich, L. Goerigk, *J. Comput. Chem.* **2011**, *32*, 1456–1465.
- (21) Wolff, S. K. Analytical Second Derivatives in the Amsterdam Density Functional Package. *Int. J. Quantum Chem.* **2005**, *104*, 645–659.
- (22) Stephens, P. J.; Devlin, F. J.; Chabalowski, C. F.; Frisch, M. J. Ab Initio Calculation of Vibrational Absorption and Circular Dichroism Spectra Using Density Functional Force Fields. *J. Phys. Chem.* **1994**, *98*, 11623–11627.
- (23) (a) A. Klamt, G. Schüürmann, *J. Chem. Soc. Perkin Trans. 2* **1993**, 799–805. (b) A. Klamt, *J. Phys. Chem.* **1995**, *99*, 2224–2235. (c) A. Klamt, V. Jonas, *J. Chem. Phys.* **1996**, *105*, 9972–9981.
- (24) van Lenthe, E.; Ehlers, A.; Baerends, E.-J. Geometry Optimizations in the Zero Order Regular Approximation for Relativistic Effects. *J. Chem. Phys.* **1999**, *110*, 8943–8953.
- (25) H. Li, M. B. Hall, *J. Am. Chem. Soc.* **2015**, *137*, 12330–12342.
